# Supplementary material for: Sterile Insects to Enhance Agricultural Development: The Case of Sustainable Tsetse Eradication on Unguja Island, Zanzibar, Using an Area-Wide Integrated Pest Management Approach
Source: PubMed Central journal article supplement (PMC4038469; doi:10.1371/journal.pntd.0002857), 2014-05-29
Supplement: pntd.0002857.s003.pdf [file pntd.0002857.s003.pdf]

**LIVESTOCK AND AGRICULTURE DEVELOPMENT IN  
ZANZIBAR, PRE- AND POST-TSETSE ERADICATION**

**PROJECT: RAF 5 040**

**Report prepared for IAEA by:**

**Tambi, N. Emmanuel,<sup>1</sup> Maina, W. Onesmus<sup>1</sup> and Mdoe, S.Y. Ntengua<sup>2</sup>**

<sup>1</sup> OAU/IBAR-ILRI, P.O. Box 30709 Nairobi, Kenya.

<sup>2</sup> Department of Agricultural Economics, Sokoine University, Morogoro, Tanzania.

**December, 1999**

## Table of contents

|                                                                                              | Page |
|----------------------------------------------------------------------------------------------|------|
| <b>Table of contents</b>                                                                     | 2    |
| <b>List of Tables</b>                                                                        | 6    |
| <b>List of Figures</b>                                                                       | 9    |
| <b>Summary</b>                                                                               | 10   |
| <b>1.0 Introduction</b>                                                                      | 12   |
| 1.1 Objectives                                                                               | 13   |
| <b>2.0 Methodology</b>                                                                       | 14   |
| 2.1 Study Area                                                                               | 14   |
| 2.2 Field Visit                                                                              | 15   |
| 2.3 Sample Design                                                                            | 15   |
| 2.4 Development of the questionnaire                                                         | 15   |
| 2.5 Questionnaire administration                                                             | 16   |
| 2.6 Data compilation and analysis                                                            | 17   |
| <b>3.0 Results</b>                                                                           | 18   |
| 3.1 Household socio-economic characteristics                                                 | 18   |
| 3.1.1 Age and sex distribution                                                               | 18   |
| 3.1.2 Education and religious affiliation                                                    | 19   |
| 3.1.3 Household size and structure                                                           | 20   |
| 3.1.4 Occupational distribution                                                              | 20   |
| 3.1.5 Household income                                                                       | 21   |
| 3.2 Livestock and agriculture development in Ugunja, pre-tsetse control/eradication, 1985/86 | 22   |
| 3.2.1 Livestock production                                                                   | 22   |
| 3.2.1.1 Livestock production systems                                                         | 22   |
| 3.2.1.2 Livestock numbers                                                                    | 22   |
| 3.2.1.3 Livestock farms                                                                      | 23   |
| 3.2.1.4 Livestock species raised and their production and reproduction parameters            | 25   |
| 3.2.1.4.1 Cattle                                                                             | 25   |

|             |                                                                                    |    |
|-------------|------------------------------------------------------------------------------------|----|
| 3.2.1.4.1   | Cattle herd structure                                                              | 26 |
| 3.2.1.4.2   | Small ruminants                                                                    | 26 |
| 3.2.1.4.3   | Poultry                                                                            | 27 |
| 3.2.1.4.4   | Donkeys                                                                            | 27 |
| 3.2.1.5     | Dairy production, processing and marketing                                         | 27 |
| 3.2.1.6     | Livestock disease situation                                                        | 28 |
| 3.2.1.6.1   | Tsetse and Trypanosomosis in Unguja                                                | 28 |
| 3.2.1.6.2   | Tsetse and typanosomosis control measures                                          | 30 |
| 3.2.1.6     | Tsetse and trypanosomosis eradication using<br>the SIT in Unguja                   | 32 |
| 3.2.1.6.4   | Farmer awareness of typanosomosis                                                  | 33 |
| 3.2.1.6.4.1 | Impact on cattle production                                                        | 34 |
| 3.2.1.6.4.2 | Impact on milk production                                                          | 36 |
| 3.2.2       | Crop production                                                                    | 38 |
| 3.2.2.1     | Crop production systems                                                            | 38 |
| 3.2.2.1.1   | Tree crop production                                                               | 38 |
| 3.2.2.1.2.  | Food crop production                                                               | 38 |
| 3.3.3.      | Exports and imports of livestock and agricultural<br>products                      | 41 |
| 3.2         | Livestock and agriculture development in Ugunja,<br>post-tsetse eradication, 1999. | 43 |
| 3.3.1       | Livestock production                                                               | 43 |
| 3.3.1.1     | Livestock production systems                                                       | 43 |
| 3.3.1.2     | Livestock species raised                                                           | 44 |
| 3.3.1.2.1   | Cattle                                                                             | 44 |
| 3.3.1.2.2   | Sheep and goats - <del>na</del>                                                    | 45 |
| 3.3.1.2.3   | Chickens                                                                           | 45 |
| 3.3.1.2.4   | Donkeys and rabbits                                                                | 46 |
| 3.3.1.3     | Dairy Production                                                                   | 46 |
| 3.3.1.3.1   | Dairy production with indigenous cattle                                            | 46 |
| 3.3.1.3.2   | Dairy production with improved cattle                                              | 47 |
| 3.3.2       | Crop production                                                                    | 48 |
| 3.3.2.1     | Types of crops produced                                                            | 48 |
| 3.3.2.2     | Acreage cultivated                                                                 | 49 |
| 3.3.2.3     | Quantities of crops harvested and yields                                           | 50 |
| 3.3.3       | Implications for agricultural development and marketing                            | 51 |

|            |                                                                                             |           |
|------------|---------------------------------------------------------------------------------------------|-----------|
| 3.3.3.1.   | Intensification of livestock and crop production                                            | 53        |
| 3.3.3.1.1. | Adoption of improved livestock breeds and crop varieties                                    | 54        |
| 3.3.3.1.2  | Access to land resources                                                                    | 56        |
| 3.3.3.1.3  | Integration of crops and livestock                                                          | 57        |
| 3.3.3.1.4  | Adoption of animal power                                                                    | 58        |
| 3.3.3.1.5  | Dairy intensification                                                                       | 59        |
| 3.3.3.1.6. | Processing and marketing of milk and dairy products                                         | 61        |
| 3.3.4      | Predictive scenarios for livestock and agricultural development through 2005, 2010 and 2015 | 63        |
| 3.3.4.1    | Meat                                                                                        | 63        |
| 3.3.4.2    | Milk                                                                                        | 65        |
| 3.3.4.3    | Eggs                                                                                        | 66        |
| 3.3.4.4    | Projections for livestock production systems                                                | 67        |
| 3.3.4.5    | Implications of the projections in livestock products                                       | 67        |
| 3.3.4.6    | Crop production projections, 1999 to 2015                                                   | 67        |
| 3.3.       | Issues requiring attention by the Zanzibar authorities and other parties                    | 69        |
| <b>4.0</b> | <b>Framework for economic impact assessment of tsetse control/eradication</b>               | <b>73</b> |
| 4.1.       | Why a framework for impact assessment                                                       | 73        |
| 4.2.       | Previous work                                                                               | 73        |
| 4.3.       | Important considerations for developing a framework                                         | 77        |
| 4.3.1.     | Direct losses                                                                               | 77        |
| 4.3.2.     | Indirect losses                                                                             | 77        |
| 4.3.3.     | Direct benefits                                                                             | 78        |
| 4.3.3.1.   | Mortality losses avoided                                                                    | 78        |
| 4.3.3.2.   | Morbidity losses avoided                                                                    | 78        |
| 4.3.3.3.   | Control and treatment costs saved                                                           | 78        |
| 4.3.4.     | Indirect benefits                                                                           | 79        |
| 4.3.4.1.   | Constraints on livestock production eliminated                                              | 79        |
| 4.3.4.2.   | Constraints on agricultural production eliminated                                           | 79        |
| 4.3.4.3.   | Constraints on livestock-crop integration                                                   | 80        |
| 4.4.       | Application of the framework to economic analysis                                           | 80        |
| 4.4.1.     | Data needs for estimating mortality losses                                                  | 81        |
| 4.4.2.     | Data needs for estimating morbidity losses                                                  | 81        |
| 4.4.3.     | Data needs for estimating control/eradication costs                                         | 82        |
| 4.4.4.     | Data needs for estimating indirect losses on livestock and                                  |           |

|                                                                                                       |           |
|-------------------------------------------------------------------------------------------------------|-----------|
| agricultural production.                                                                              | 82        |
| 4.4.5. Other data needs                                                                               | 83        |
| 4.4.6. Calculations required                                                                          | 83        |
| 4.4.6.1. Mortality and morbidity losses                                                               | 83        |
| 4.4.6.2. Economic value of livestock and agriculture<br>production under conditions of trypanosomosis | 85        |
| 4.4.6.3. Decision criteria                                                                            | 86        |
| <b>5.0. Summary and conclusion</b>                                                                    | <b>87</b> |
| <b>References</b>                                                                                     | <b>89</b> |
| <b>Annexes</b>                                                                                        | <b>92</b> |

**List of Tables**

|                                                                                                                                                 | <b>Page</b> |
|-------------------------------------------------------------------------------------------------------------------------------------------------|-------------|
| Table 1. Sex and Age distribution of household heads                                                                                            | 19          |
| Table 2. Educational level and religious affiliation of household heads                                                                         | 19          |
| Table 3. Household structure by age and sex category                                                                                            | 20          |
| Table 4. Distribution of household heads by occupation                                                                                          | 21          |
| Table 5. Average household income and frequency distribution of household income                                                                | 21          |
| Table 6. Results of the cattle census Unguja Island in 1993                                                                                     | 23          |
| Table 7. Total number of cattle by type and district in Unguja 1993                                                                             | 23          |
| Table 8. Farmers raising livestock in Unguja, Zanzibar, before tsetse intervention in 1985/86                                                   | 24          |
| Table 9. Average herd and flock sizes for cattle, sheep, goats and poultry on Unguja Island 1985/86                                             | 24          |
| Table 10. Calving and mortality rates at the Bambi dairy farms, 1977-1985                                                                       | 25          |
| Table 11. Milk production at farm level in Unguja, 1985/86                                                                                      | 26          |
| Table 12. Milk and milk products produced by the Zanzibar Dairy Corporation, 1977-1985                                                          | 27          |
| Table 13. Milk sales from indigenous cattle in Unguja 1985/86                                                                                   | 28          |
| Table 14. Prevalence of cattle typanosomosis in Unguja Island, Zanzibar, March 1987 before the initiation of the Animal Disease Control Project | 30          |
| Table 15. Prevalence of cattle typanosomosis in Unguja, Zanzibar, 1982 to 1984                                                                  | 31          |
| Table 16. Farmer awareness of tsetse and trypanosomosis and methods used to prevent and/or treat trypanosomosis                                 |             |

|           |                                                                                                       |    |
|-----------|-------------------------------------------------------------------------------------------------------|----|
|           | prior to eradication in Unguja, Zanzibar.                                                             | 34 |
| Table 17. | Farms, plots affected by tsetse prior to eradication in Unguja, Zanzibar                              | 35 |
| Table 18. | Effect of typanosomosis on cattle production before tsetse control/eradication in Unguja, Zanzibar    | 36 |
| Table 19. | Effect of trypanosomosis on farms producing milk from indigenous cattle in Unguja, Zanzibar           | 37 |
| Table 20. | Effect of trypanosomosis on farms producing milk from improved dairy cattle in Unguja, Zanzibar       | 37 |
| Table 21. | Changes in crop production in Unguja, 1975/76 to 1996/97                                              | 39 |
| Table 22. | Land area cultivated and quantities of crops harvested and yields/acre in 1985/86 in Unguja, Zanzibar | 40 |
| Table 23. | Value of hides and skins exported to Mainland Tanzania, 1994-1999                                     | 41 |
| Table 24. | Slaughter cattle imported from Mainland Tanzania, 1978-1995                                           | 42 |
| Table 25. | Value of imported milk and milk products 1992-1998                                                    | 43 |
| Table 26. | Cattle production systems practised in Unguja, Zanzibar                                               | 43 |
| Table 27. | Proportion (%) of farms with livestock in Unguja, 1999                                                | 44 |
| Table 28. | Cattle herd structure by age and sex category in Unguja, Zanzibar, 1999                               | 45 |
| Table 29. | Average herd/flock sizes for cattle, chickens, sheep and goats in Unguja, 1999                        | 46 |
| Table 30. | Milk production within the traditional sector in Unguja, Zanzibar, 1999                               | 47 |
| Table 31. | Calving and mortality rates for dairy cattle at the Bambi Research Station, 1986-1992                 | 48 |
| Table 32. | Food crops considered as important by farmers                                                         | 48 |

|           |                                                                                                             |    |
|-----------|-------------------------------------------------------------------------------------------------------------|----|
| Table 33. | Cash crops considered as important by farmers                                                               | 49 |
| Table 34. | Changes in land area cultivated before and after tsetse in Unguja, Zanzibar                                 | 49 |
| Table 35. | Changes in food and cash crop quantities harvested before and after tsetse intervention in Unguja, Zanzibar | 50 |
| Table 36. | Changes in food and cash crop yields obtained before and after tsetse intervention in Unguja, Zanzibar      | 51 |
| Table 37. | Average herd/flock sizes for cattle, chickens, sheep and goats in Unguja, pre and post tsetse intervention  | 52 |
| Table 38. | Farmers' ranking of the importance of other animal diseases                                                 | 52 |
| Table 39. | Farmer awareness of the availability of improved livestock species in Unguja, Zanzibar                      | 54 |
| Table 40. | Farmers' preference for improved livestock breeds and reasons                                               | 54 |
| Table 41. | Sources of improved livestock species in Unguja, Zanzibar                                                   | 55 |
| Table 42. | Important constraints to the acquisition of improved livestock breeds in Unguja, Zanzibar                   | 55 |
| Table 43. | Average prices paid by farmers for improved livestock breeds in Unguja, Zanzibar                            | 56 |
| Table 44. | Access to land in tsetse cleared areas in Unguja, Zanzibar                                                  | 57 |
| Table 45. | Feed stuffs fed to livestock in Unguja, Zanzibar, 1999                                                      | 58 |
| Table 46. | Use of animal manure for crop production                                                                    | 58 |
| Table 47. | Use of farm animals for traction and transport                                                              | 59 |
| Table 48. | Production and reproduction parameters for dairy cattle in Unguja, Zanzibar, 1999                           | 60 |
| Table 49. | Feeding systems and feed stuffs fed to dairy cattle in Unguja, Zanzibar 1999                                | 60 |
| Table 50. | Breeding methods for dairy cattle and sources of breeding                                                   |    |



|           |                                                                                                                            |    |
|-----------|----------------------------------------------------------------------------------------------------------------------------|----|
|           | materials in Unguja, Zanzibar, post-tsetse eradication                                                                     | 61 |
| Table 51. | Milk and milk products produced by the Zanzibar Dairy Corporation, 1986-1995                                               | 62 |
| Table 52. | Projections for beef, poultry, lamb and mutton production in Unguja, Zanzibar, 1986-2015 (Low performance scenario)        | 63 |
| Table 53. | Projections for beef, poultry, lamb and mutton productions in Unguja, Zanzibar, 1986-2015 (Medium performance scenario)    | 64 |
| Table 54. | Projections for beef, poultry, lamb and mutton production in Unguja, Zanzibar, 1986-2015 (Medium performance scenario)     | 65 |
| Table 55. | Projections for milk production per capita in Unguja, Zanzibar, 1986-2015                                                  | 66 |
| Table 56. | Projections of total and per capita eggs production in Unguja, Zanzibar, 1986-2015                                         | 67 |
| Table 57. | Projections of total and per capita production of food and cash crops in Zanzibar, 1999-2015 (Low performance scenario)    | 68 |
| Table 58. | Projections of total and per capita production of food and cash crops in Zanzibar, 1999-2015 (Medium performance scenario) | 69 |
| Table 59. | Projections of total and per capita production of food and crops in Zanzibar, 1999-2015 (High performance scenario)        | 69 |

### List of figures

|           |                                                                         |    |
|-----------|-------------------------------------------------------------------------|----|
| Figure 1. | Map of Unguja Island, Zanzibar                                          | 14 |
| Figure 2. | Framework for economic impact assessment of tsetse control/eradication. | 76 |

## SUMMARY

The purpose of this assignment was to collect baseline data on the livestock and agriculture situation in Unguja, Zanzibar before the initiation of tsetse/trypanosomosis control/eradication in 1985/86 and the current situation in 1999. While serving as inputs for a future economic impact assessment of tsetse/trypanosomosis control/eradication, the data were to be used to (i) describe the developments in livestock and agriculture that have occurred since the initiation of the intervention in 1985/86 and (ii) predict future developments in livestock and agriculture production. To enable the economic impact assessment to be carried out, a framework of analysis was to be developed.

The approach adopted consisted of a review of the relevant documents on tsetse/trypanosomosis in Zanzibar, collection of data on relevant parameters from these secondary sources; field visits involving informal discussions with key informants and other stake holders; design of a field survey using a formal questionnaire; and data compilation, analysis and report writing.

Based on the informal discussions, the secondary and primary data gathered, there is the general conclusion that the livestock and agriculture situation in Unguja, Zanzibar in 1999 has changed significantly from what it was before the initiation of tsetse/trypanosomosis control/eradication in 1985/86. The overall change is evidenced by increased growth in the livestock sub-sector relative to the crops sub-sector. Livestock contribution to GDP for example, increased from 12% in 1986 to 34% in 1997 whereas the share of crops in GDP dropped from 81% in 1986 to 59% in 1997.

Whereas areas cultivated for crops such as cassava, sweet potatoes, tania (cocoyams), maize and plantain increased or remained the same after 1985/86, yields obtained for these crops declined, suggesting a decline in productivity of land used to produce these crops. Improvements have however, been observed for some crops. Areas cultivated for cloves, yams and coconuts declined after 1985/86, but the yields obtained increased, suggesting that productivity of these crops has improved. This is not surprising especially for cloves as there has been deliberate efforts by the government to revive cloves production in Zanzibar. With regard to livestock, not only has the relative proportion of farms raising cattle and small ruminants increased in 1999 compared to 1985/86, the number of farms with improved cattle breeds has also increased, making it possible for improved cattle to supply 35% of the total milk production compared to about 10% before the intervention. Evidence for intensification of livestock and agricultural activities in Unguja is provided by the increased crop-livestock integration through more farmers using manure for their crop production while in turn using crop by-products to feed their animals. The use of animal power for ploughing and transport activities is also increasing. While several factors may have contributed to the achievement of these results, there is general consensus among people in Zanzibar that the eradication of tsetse and trypanosomosis in 1997 has resulted in significant gains in the livestock sub-sector. Zanzibar's Agricultural Sector Review of 1999 indicates that the International Atomic Energy Agency (IAEA) sponsored tsetse-

eradication project produced some of the best successful results of donor funded projects in East Africa. The information in this report provides some support to this claim.

Although the total production of livestock and agriculture has been projected to increase in the near future, per capita consumption of major livestock and crop products generally fall short of the planned targets. Current production trends indicate that the domestic consumption needs may not be met. Imports will continue to be needed to fill the deficit. However, continued reliance on food imports cannot be sustained and could impact negatively on domestic livestock and agricultural production. Deliberate efforts must be made by Zanzibar authorities in collaboration with private sector and other stakeholders to tackle constraints which are affecting the livestock and agricultural sector. These constraints include poor livestock and crop extension services, processing and marketing of crop and livestock products, diseases and low usage of inputs and improved livestock and crop varieties. Provision of affordable and smallscale oriented credit facilities could greatly improve livestock and crop production.

This report does not purport to have assessed the economic impact of tsetse eradication in Unguja, Zanzibar. Rather, it only provides data on some key parameters and proposes a framework that could be used to carry out an economic impact assessment.

## 1.0 INTRODUCTION

Agriculture is the most important sector of the economy of Zanzibar. In 1997, it contributed 38% (37,997 Million TShs) (US\$ 62.3 million) to the GDP (99,208 Million TShs) (US\$ 162.6 million) measured at current market prices, 75% of foreign exchange earnings and employed about 60% of labor force (FAO, 1999; Zanzibar, URT, Department of Statistics, 1999). The relative contribution of agriculture to GDP has been declining in recent years, from an average of 46% between 1980 and 1986 to 39% between 1987 and 1997. The relative decline in agricultural sector contribution to GDP is due to a decline in crop production and an increase in the contribution of other sectors to the economy. In 1986 for example, the share of crops in total agricultural production was 81%. In 1990 crops contributed 77% to total agricultural production whereas in 1997 the contribution was only 59%. On the other hand, the livestock sub-sector's contribution to agricultural GDP has been steadily rising over the last decade. Before 1986 livestock contributed an average of 12% to agricultural GDP. From 1987 to 1997, the contribution of livestock to agricultural GDP averaged 24%, rising from 22% in 1988 to 34% in 1997 (Annex 1). This reflects the important role that livestock has assumed in the economy of Zanzibar and the efforts being made to improve and intensify livestock production.

Efforts to improve and intensify livestock production in Zanzibar have continued to be hampered by a number of constraints, livestock disease being the most important. Up to 1996/97 trypanosomosis was the most important disease constraining livestock production. To control and eradicate the disease, a joint effort between the Food and Agriculture Organisation, United Nations Development Programme (FAO/UNDP) and the Government of Zanzibar (GoZ) was initiated from 1985/86 to 1993. This effort succeeded to a large extent in controlling fly populations and in reducing the incidence of trypanosomosis, but never managed to eradicate the disease. Long-term use of prophylactic or curative drugs for trypanosome suppression was not practicable or economical. Rather, interruption of transmission by vector eradication was considered the most viable long-term solution. In 1994 the International Atomic Energy Agency (IAEA) introduced the Sterile Insect Technique (SIT) under project URT/5/016 - Tsetse Fly Eradication on Zanzibar. In 1997, as a result of a special team effort by the Tsetse and Trypanosomosis Research Institute (TTRI) at Tanga, the Department of Livestock Development-Zanzibar, and the IAEA, tsetse and trypanosomosis were eradicated from Zanzibar.

Following eradication in 1997 there has been a need to assess the economic impact of the intervention on livestock and agriculture development. Unfortunately, the baseline data needed for such an assessment were not available at the start of the tsetse control/eradication interventions i.e. in 1985/86. This study is an attempt to retrospectively collect some information and define a framework for a future economic impact assessment of the tsetse control/eradication intervention. The study reports information collected from secondary sources and from a sample survey conducted in July-August, 1999.

### 1.1. Objectives

The main objectives of this study are to (i) retrospectively obtain baseline data on the livestock situation and related agricultural and other relevant economic parameters on Unguja Island of Zanzibar before initiation of tsetse/trypanosomosis intervention operations in 1985/86 and the current situation in 1999; and (ii) establish a framework for economic impact assessment of tsetse eradication and related investment into livestock and agricultural development in Unguja. Based on the information collected, the following specific objectives are to be accomplished:

- (i) Summarise the status of livestock and agricultural systems in 1985/86, highlighting indicative key parameters for livestock productivity and performance and stressing the respective implications for agricultural systems and for marketing of agricultural products;
- (ii) summarise the status of livestock and agriculture development in 1999, highlighting indicative key parameters that show changes in livestock numbers, productivity and performance; quantifying and qualifying the changes and assessing whether they are related to or due to the tsetse fly eradication operations that were implemented in late 1997;
- (iii) prepare some predictive scenarios for the livestock and agricultural development through 2005, 2010 and 2015, taking into consideration the livestock and agricultural development over the past 15 years (1985 - 1999) and the assessed potential of livestock and agricultural development of Zanzibar and the respective development plans of Zanzibar; and
- (iv) advise on issues that require attention by the Zanzibar authorities and other partners involved in livestock and agriculture development in Zanzibar.

## 2.0. METHODOLOGY

### 2.1. Study area

As part of the United Republic of Tanzania, Zanzibar is located 35 km off the eastern coast of Tanzania in the Indian Ocean (Figure 1). It comprises of two sister islands - Unguja and Pemba. Zanzibar has a total land area of 2,332 km<sup>2</sup> and a human population of 840,000 inhabitants. Unguja has a land area of 1,664 km<sup>2</sup> and a population of 493,000 inhabitants. The annual population growth rate is 2.7%.

Unguja has a warm and humid equatorial climate with the main rainy seasons occurring during the months of March to May (Masika) and from October to November (Vuli). The cold season is from June to August while the hot season (Kaskazi) is from December to February. Zanzibar has an average annual rainfall of 114 mm (1996) with a minimum of 5 mm in September and a maximum of 545 mm in May. The annual average temperature is 31°C with a low of 29°C and a high of 33°C.

Figure 1. Map of Unguja Island, Zanzibar

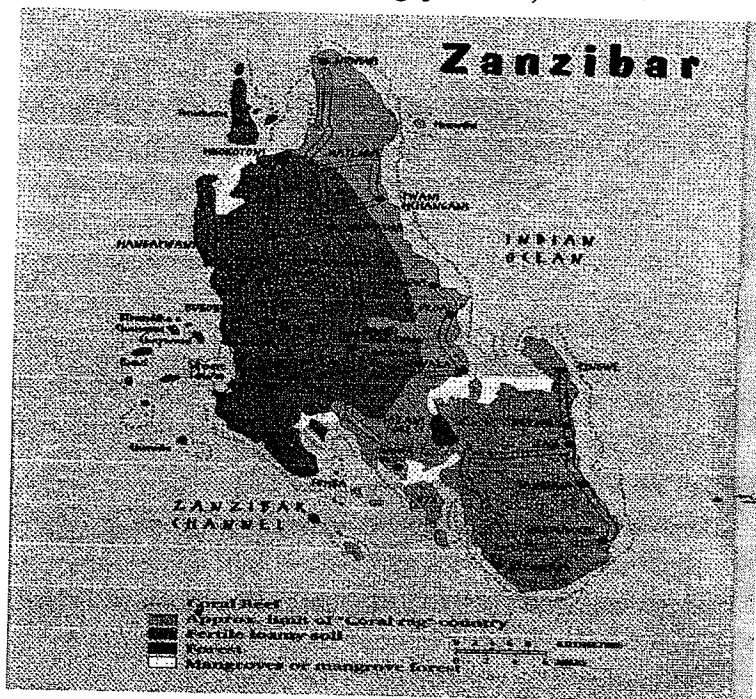

## **2.2. Field visit**

The attempt to collect information for assessment of the economic impact of tsetse control/eradication in Zanzibar began in May 1999 when the team of three persons (agricultural economists) made the first three-week mission to Unguja, Zanzibar. Upon arriving in Unguja, the team met with the senior staff of the Commission of Agriculture and Livestock (CAL) to discuss the logistics and facilitation of the data collection exercise. Following a series of meetings, visits were made to the Ministry of Agriculture, the Agricultural Research and Training Center at Kizimbani, the Department of Statistics, Ministry of State Planning and Investment, and the Ministry of Trade, Industries and Marketing. During these visits, the team examined a wide range of documents and studies related to tsetse and trypanosomosis, the livestock and agricultural situation in Zanzibar, the general economy of Zanzibar and the institutional and policy environment governing livestock and agricultural production in Zanzibar.

The field visits were nevertheless not without problems. The first mission visit coincided with the time when most government officials were busy with annual budget preparations for presentation to Parliament. It was difficult to organize meetings with some of them. Secondary data sources available had inadequate time series data on crop production, livestock numbers and productivity as well as livestock trade. The problem of inadequate data was further compounded by the lack of baseline studies before the tsetse intervention. Where possible, for example in case of livestock numbers, growth rates estimated from available data were used for projections of their numbers and products.

## **2.3. Sample design**

No recent livestock census was available as a sample frame from which the sample farmers could be drawn. However, a list of all the villages in each District of Unguja was available from the Commission for Agriculture and Livestock. A two stage sampling procedure was used. Prior to selecting the sample villages, the cattle population of each district was established based on the 1993 livestock census. The human population and number of households in each District were also established based on the 1995 population estimate. Of the 125 villages, 51% (64) were found to have been infested with tsetse flies before the start of intervention in 1985/86. Taking into consideration the location of each village, the levels of infestation by tsetse flies and the logistics, 50 villages (40%) were identified (Annex 2). A random sample of 1,200 farms was selected taking into account the number of infested villages, households, cattle and human populations (Annex 3). The sample size represented 1.6% of the total number of households in Unguja.

## **2.4. Development of the questionnaire**

A preferred survey tool for establishing parameter values for economic impact assessment would have been to trace over time, the households surveyed before the intervention. This was not possible because no baseline survey was undertaken before the start of tsetse

control/eradication in 1985/86. Since farmers also did not keep records of their farm activities, it was thus necessary to rely on respondent recall of events to obtain data for the before-and-after periods. In developing the questionnaire, a number of steps were taken to handle the well-known problems associated with recall data. The questionnaire and the interview methods were designed to facilitate recall. For example, questions seeking information on events before the start of intervention in 1985/86 were followed by cross check questions and general enquiries to freshen memories, and respondents were invited to refer to particular events at a given time. Enumerators were asked to mention events of past livestock projects, particularly those which had a tsetse control component, of which there was a direct contact between an extension officer and the farmer (Annex 4). Given that farmers are more apt to recall events at the time they initiate an activity (e.g. starting a livestock or crop production enterprise) than during a specific year (e.g. 1985/86), cross check questions were also added for information at the time they started. The rationale of having a large sample size was thus to enable a greater number of those who started in 1985/86 to be interviewed.

The questionnaire contained a total of 66 closed and open ended questions to enable respondents report freely and give reasons for certain answers. It covered the general socio-economic characteristics of the respondents; the status and evolution of livestock and agricultural development at the farm level; livestock and crop production systems; land use practices; crop-livestock interactions; the animal disease situation, feeding, breeding and management practices; the pre- and post-tsetse eradication livestock and crop productivity parameters; and the future potential of livestock and agricultural development. Questions were also included to establish changes in livestock and crop production. Because dairy offers more possibilities for increased intensification, a section of the questionnaire was devoted to the dairy enterprise. The specific questions covered the pre- and post-tsetse eradication productivity parameters for dairy.

## **2.5. Questionnaire administration**

The questionnaire was administered by 18 enumerators (Annex 5) and two supervisors. The enumerators, who were all employees of the Ministry of Agriculture and Livestock were recruited and trained by the team members during the first mission with the assistance of the Tsetse Monitoring Project URT/5/018 staff. During field implementation, the enumerators were organized into four groups and each was assigned a group leader. Interviews began on July 29 and ended on August 15, 1999. In each village, farmers were informed through the *Shehas* (village leaders) one or two days before the proposed date of interviews. Most interviews took place in the morning period to enable farmers attend to their farm duties. Other interviews took place in the evenings, upon the farmer's return from the farm. On average, each questionnaire was completed within 2 hours. Farmers who had been raising livestock for a long time took longer to be interviewed as was the case with those who were growing crops in areas cleared of tsetse flies.

Farmers co-operated well and were willing to spend more time with the enumerators. Their hopes and expectations were quite high upon learning of the survey. The anticipated



difficulties with memory lapse appeared not to have been serious as most farmers were able to provide information for 1985/86 when the tsetse intervention started. Recall was facilitated by events of the time since the campaign against tsetse and trypanosomosis was a major event in Unguja at that time.

Administration of the questionnaire however, was not without a few snags. Unanticipated problems cropped up for certain categories of data. For example, some respondents who thrived on fishing as a major occupation considered it as farming whereas others considered it as another form of occupation. Following the supervisors' reports, the first few days of the survey were characterized by sloppy field work by some enumerators. This necessitated a field visit by one of the team members to monitor and stream line the field activities of the enumerators and supervisors. This intervention notwithstanding, some enumerators managed to turn in questionnaires with problems that the supervisors failed to catch. This necessitated proper screening of the questionnaire prior to data extraction. Approximately 5% of the sample size was discarded following the screening exercise.

## **2.6. Data compilation and analysis**

Prior to data extraction, questionnaires were coded by administrative district. Computer programs were prepared in the Excel software and each response was coded. During data extraction, an unanticipated problem arose from enumerator-introduced errors such as entering the value "zero" where "no response - not applicable" should have been entered. Problems associated with quantity measurements were resolved by converting them into a single unit. For example, milk reported in 750 cc bottles was converted into liters. Quantities of crops (e.g. cassava, rice, maize, tania, sweet potatoes, cloves) reported in bags, *polos* or *gunias* were multiplied by 50 kg. Quantities reported in *pakachas* (local basket made of palm leaves) were multiplied by 15 kgs while quantities of crops (e.g. tomatoes and other vegetables) reported in *susus* (local container made of palm leaves) were multiplied by 5 kg. For coconuts, two pieces were assumed to be equivalent to one kg. Crop yields were estimated by converting quantities harvested into kilograms per acre. The data were analyzed using the Excel software.

### **3.0. RESULTS**

This section reports the information obtained from secondary sources and from interviews conducted during the survey. The survey results are combined with the secondary information to describe the livestock and agriculture situation in Unguja before the tsetse intervention in 1985/86 and the post-tsetse eradication situation in 1999. The first part presents the household socio-economic characteristics of the sample farmers. The second part describes the status of livestock and agriculture development before tsetse intervention in 1985/86, using the key parameters for livestock productivity and performance and discusses the implications for the agricultural production and marketing systems. Part three presents the current (1999) status of livestock and agriculture development, using the key parameters that show changes in livestock productivity and performance and discusses their relationships with the tsetse eradication intervention. In the fourth part, the future livestock and agriculture situation of Unguja is predicted through 2005, 2010 and 2015 under a number of scenarios taking into account the developments over the period from 1985/86 to 1999. Issues that require attention by the Zanzibar authorities and other partners involved in livestock and agriculture development in Zanzibar are discussed in the fifth part. Finally, the conclusions and recommendations are presented.

#### **3.1. Household socio-economic characteristics**

##### **3.1.1. Age and sex distribution**

About 96% of the sample households were headed by males while only 4% were headed by females (Table 1). North-A and South Districts had all male headed households while the rest of the districts had a small percentage of female household heads. The average age was 41 years with a maximum of 85 years and a minimum of 13 years.<sup>1</sup> Average age varied from 37 years in North-A to 46 years in North-B. Four percent of the households fell within the age category of less than 21 years while 42% fell within the category of 21 to 35 years. About one fifth of the household heads were older than 55 years. These estimates indicate that household heads in Zanzibar are generally of middle age with 79% falling within the 21 to 55 age bracket.

---

<sup>1</sup> This person lost both parents

Table 1. Sex and age distribution of household heads.

| Sex and age category    | District |         |         |       |      | All districts |
|-------------------------|----------|---------|---------|-------|------|---------------|
|                         | Central  | North-A | North-B | South | West |               |
| Sex (%): Male           | 98.0     | 100.0   | 93.7    | 100.0 | 86.7 | 95.7          |
| Female                  | 2.0      | 0.0     | 6.3     | 0.0   | 13.3 | 4.3           |
| Total number            | 392      | 65      | 255     | 186   | 240  | 1,138         |
| Average age (Years)     | 38.2     | 37.4    | 46.1    | 38.1  | 44.5 | 40.8          |
| Std. de.                | 13.1     | 14.4    | 15.5    | 12.5  | 14.5 | 10.9          |
| Maximum                 | 75.0     | 70.0    | 85.0    | 85.0  | 85.0 | 85.0          |
| Minimum                 | 16.0     | 13.0    | 18.0    | 19.0  | 19.0 | 13.0          |
| % within this age group |          |         |         |       |      |               |
| Less than 21 years      | 3.6      | 9.2     | 1.6     | 2.7   | 0.8  | 3.6           |
| 21 to 35 years          | 49.0     | 50.8    | 30.3    | 48.4  | 31.3 | 42.0          |
| 36 to 55 years          | 34.4     | 26.2    | 39.0    | 38.7  | 44.2 | 36.5          |
| Greater than 55 years   | 13.0     | 13.9    | 29.1    | 10.2  | 23.7 | 18.0          |
| Total number            | 392      | 65      | 255     | 186   | 240  | 1,138         |

Source: Economic Assessment of Livestock Development on Zanzibar Survey, 1999.

### 3.1.2. Education and religious affiliation

Regarding formal education, the results in Table 2 suggest that about 99% of the household heads never went beyond high school level. About 18% had no formal education, 7% had acquired some form of adult education. Household heads with primary level education made up 42% while one third had secondary level education. These results suggest that in general, the level of education in Zanzibar is low, with about two thirds having at best, primary level education. The household heads are predominantly Muslims (95%) with only 4% as Christians and 1% being of other religious affiliations.

Table 2. Educational level and religious affiliation of household heads.

| % households within this level of education | District |         |         |       |      | All districts |
|---------------------------------------------|----------|---------|---------|-------|------|---------------|
|                                             | Central  | North-A | North-B | South | West |               |
| No formal education                         | 13.8     | 16.9    | 27.5    | 9.2   | 20.8 | 17.6          |
| Adult education                             | 6.6      | 6.2     | 9.2     | 4.3   | 7.3  | 6.7           |
| Primary                                     | 44.6     | 46.2    | 39.8    | 39.5  | 41.7 | 42.4          |
| Secondary                                   | 32.4     | 30.8    | 23.1    | 47.0  | 30.2 | 32.7          |
| High School                                 | 2.0      | 0.0     | 0.4     | 0.0   | 0.0  | 0.5           |
| University                                  | 0.5      | 0.0     | 0.0     | 0.0   | 0.0  | 0.1           |
| Total number                                | 392      | 65      | 251     | 186   | 240  | 1,134         |
| Religious affiliation (%)                   |          |         |         |       |      |               |
| Muslim                                      | 94.4     | 100.0   | 98.0    | 96.2  | 87.5 | 95.2          |
| Christian                                   | 3.6      | 0.0     | 2.0     | 1.6   | 12.1 | 3.9           |
| Others                                      | 2.0      | 0.0     | 0.0     | 2.2   | 0.4  | 0.9           |
| Total number                                | 392      | 65      | 255     | 186   | 240  | 1,138         |

Source: Economic Assessment of Livestock Development on Zanzibar Survey, 1999.

### 3.1.3. Household size and structure

Table 3 shows the household structure by age and sex category. The average household size was 8.5 persons with a maximum of 37 persons and a minimum of one person. North-A District had the largest average household size of 9.3 persons while South District had the smallest size of 7.5 persons. Each household had an average of 3 adults and 5 children.

Table 3. Household structure by age and sex category.

| Household Size (Number) | District |         |         |       |      | All districts |
|-------------------------|----------|---------|---------|-------|------|---------------|
|                         | Central  | North-A | North-B | South | West |               |
| Average                 | 8.0      | 9.3     | 8.9     | 7.5   | 8.6  | 8.5           |
| Std.dev.                | 3.5      | 3.9     | 3.7     | 3.1   | 3.9  | 3.6           |
| Max.                    | 20.0     | 22.0    | 27.0    | 7.0   | 37.0 | 37.0          |
| Min.                    | 1.0      | 1.0     | 1.0     | 1.0   | 1.0  | 1.0           |
| Less than 12 years      | 3.0      | 3.4     | 3.2     | 2.8   | 3.4  | 3.2           |
| 12 to 18 years          | 2.4      | 2.8     | 2.5     | 2.1   | 2.2  | 2.4           |
| Adult Males             | 1.3      | 1.5     | 1.5     | 1.3   | 1.4  | 1.4           |
| Adult Females           | 1.3      | 1.6     | 1.7     | 1.3   | 1.6  | 1.5           |

Source: Economic Assessment of Livestock Development on Zanzibar Survey, 1999.

### 3.1.4. Occupational distribution

Farming is the major occupation of the people of Unguja Island. About 88% of the sample household heads reported farming as their major occupation (Table 4). By definition, farming includes livestock keeping and crop agriculture. Wage employment in the public service was an occupation for only 8% of the household heads with 4% of them involved in business and other income earning activities. Among the secondary occupations, farming was reported by about 10% of the household heads followed by 9% in business and 4% in the public service. For those who reported other occupations, fishing ranked first according to 15% of the household heads. Fishing is an important part-time activity (usually carried out during the night) for most people as Unguja is surrounded by the Indian Ocean. Fishing contributes to the household nutritional needs as well as being an income generating activity.

Table 4. Distribution of household heads by occupation.

| Major occupation: (%)     | District |         |         |       |      | All districts |
|---------------------------|----------|---------|---------|-------|------|---------------|
|                           | Central  | North-A | North-B | South | West |               |
| Farming                   | 87.8     | 93.9    | 89.0    | 84.4  | 87.5 | 88.5          |
| Business                  | 1.5      | 1.5     | 2.8     | 1.1   | 2.1  | 1.8           |
| Public service            | 8.9      | 1.5     | 6.7     | 11.8  | 9.6  | 7.7           |
| Other                     | 1.8      | 4.6     | 0.8     | 2.7   | 0.4  | 2.1           |
| Total number              | 392      | 65      | 255     | 186   | 240  | 1,138         |
| Secondary occupation: (%) |          |         |         |       |      |               |
| Farming                   | 12.2     | 6.0     | 9.4     | 10.7  | 10.8 | 9.8           |
| Business                  | 7.4      | 13.9    | 5.9     | 6.5   | 8.8  | 8.5           |
| Public service            | 1.0      | 3.1     | 2.4     | 7.5   | 7.9  | 4.4           |
| Other                     | 24.8     | 16.9    | 8.6     | 23.1  | 3.3  | 15.4          |
| Total number              | 392      | 65      | 255     | 186   | 240  | 1,138         |

Source: Economic Assessment of Livestock Development on Zanzibar Survey, 1999.

### 3.1.5. Household income

Household income averaged TShs 41,232 (US\$ 52) per month with a maximum monthly income of TShs 850,000 (US\$ 1,063) and a minimum of only TShs 2,000 (US\$ 2.5) (Table 5). Income is highest in West District despite the widest variation in income distribution. Approximately 97% the households reported an average monthly income of less than TShs 100,000 (US\$ 125), a reflection of the generally low income level of farm households in Zanzibar.

Table 5. Average household income and frequency distribution of household income.

| Household income (TSHS/Month)             | District           |                   |                  |                  |                     | All districts       |
|-------------------------------------------|--------------------|-------------------|------------------|------------------|---------------------|---------------------|
|                                           | Central            | North-A           | North-B          | South            | West                |                     |
| Average                                   | 40,425<br>(50.5)   | 29,078<br>(36.3)  | 33,214<br>(41.5) | 48,508<br>(60.6) | 54,933<br>(68.6)    | 41,232<br>(51.5)    |
| Standard deviation                        | 34,460<br>(43.1)   | 17,856<br>(22.3)  | 22,938<br>(28.7) | 37,372<br>(46.7) | 68,456<br>(85.6)    | 36,216<br>(45.3)    |
| Maximum                                   | 350,000<br>(437.5) | 90,000<br>(112.5) | 160,000<br>(200) | 400,000<br>(500) | 850,000<br>(1062.5) | 850,000<br>(1062.5) |
| Minimum                                   | 2,000<br>(2.5)     | 3,000<br>(3.7)    | 5,000<br>(6.3)   | 10,000<br>(12.5) | 3,000<br>(3.8)      | 2,000<br>(2.5)      |
| % within this income group:               |                    |                   |                  |                  |                     |                     |
| Less than 25,000 TSHS (31.3)              | 24.0               | 50.0              | 46.3             | 11.4             | 20.4                | 30.4                |
| 25,000 to 50,000 TSHS<br>(31.3) to (62.5) | 57.4               | 40.6              | 39.2             | 57.8             | 42.9                | 47.6                |
| 50,001 to 100,000 TSHS<br>(62.5) to (125) | 15.3               | 9.4               | 13.3             | 27.0             | 29.2                | 18.8                |
| 100,001 to 200,000 TSHS<br>(125) to (250) | 2.6                | 0.0               | 1.2              | 2.7              | 4.6                 | 2.2                 |
| Greater than 200,000 TSHS<br>(250)        | 0.8                | 0.0               | 0.0              | 1.0              | 2.9                 | 0.9                 |
| Total number                              | 392                | 65                | 255              | 186              | 240                 | 1,138               |

Remarks: Numbers in parentheses are values in US\$ (1 US\$ = 800 TSHS)

Source: Economic Assessment of Livestock Development on Zanzibar Survey, 1999.

From the preceding estimates, farm households in Unguja can be characterized as being predominantly headed by middle-age Muslim males with less than secondary level education. The households are relatively large with more children than adults and derive a very meagre wage from farming activities. These characteristics have important implications for livestock and agriculture development on the Island, particularly for the adoption of production systems that require human, financial and other physical resources necessary for increasing productivity.

### **3.2. Livestock and agriculture development in Unguja, pre-tsetse control and eradication, 1985/86.**

#### **3.2.1. Livestock production**

##### **3.2.1.1. Livestock production systems**

Three main livestock production systems could be distinguished in Unguja before the tsetse intervention in 1985/86. These were the extensive, semi-intensive and intensive production systems. The extensive system was characterized by free grazing of cattle, goats and sheep on communal range lands, in fields from which crops have been harvested and in coconut and clove plantations. The cattle grazing system varied according to soil type. In areas with deep soils most cattle were tethered whereas in coral rag areas, free grazing was common. Tethering was mostly done during the planting season to prevent crop damage by animals. In coral rag areas smallholders kept cattle in larger numbers than in deep soil areas where fewer numbers were raised due to the pressure on land. Goats were allowed to scavenge around the homestead and in fields after crop harvests, feeding on a variety of grasses, herbs and shrubs. Monogastric livestock such as chickens, ducks and Guinea fowls scavenged around the homestead and were occasionally supplemented with kitchen waste.

The semi-intensive system was practised by very few farmers and involved crossbred as well as highly productive local stock. The animals (mostly cattle) were grazed as in the extensive system, but were supplemented with crop by-products and crop residues. The intensive system was common with commercial dairy and poultry keeping and the breeds involved were mostly exotic and crossbred. For dairy production, the cut-and-carry (zero-grazing) system was commonly practised. Crop by-products, concentrates and mineral supplements were provided. Two intensive poultry keeping systems were operational namely battery caging and deep litter.

##### **3.2.1.2. Livestock numbers**

For the two decades preceding 1985/86, only one official livestock census was conducted in 1978 in Zanzibar. At the time Unguja had a livestock population of 28,225 cattle, 13,659 goats, 351 sheep and 319 donkeys (MALNR, 1978). During the next livestock census in 1993 the cattle population was estimated at 45,750 heads (Table 6), implying

that it had increased by 62% or 4% per year. Based on this inter-census growth rate, Unguja's cattle population was estimated at 37,142 cattle in 1986. Indigenous cattle comprised of 94.3% of the total cattle population while exotic and crossbred cattle made up 1% and 4.7% respectively (Table 7). Together, West and Central Districts had 57% of all cattle in Unguja (Table 7). Only 2.5% were available in or around the urban area.

The total population of small ruminants was estimated at 14,010 in 1978. In 1993 it was estimated at 26,847 with sheep comprising an insignificant 1.4%. The annual inter-census growth rate was estimated at 6%, meaning that in 1986 there was an estimated 22,330 small ruminants in Unguja. In 1993 the poultry population in Unguja were at 324,657 chickens, 24,921 ducks and 1,334 Guinea fowls. There were 494 donkeys, having increased by 55% from 319 in 1978. Rabbits and pigs were estimated at 335 and 66 respectively in 1993.

Table 6: Results of the cattle census Unguja Island in 1993

| District | Cattle | Goats  | Sheep | Chickens | Ducks  | Donkeys | Guinea Fowls | Rabbits | Pigs |
|----------|--------|--------|-------|----------|--------|---------|--------------|---------|------|
| North A  | 8,465  | 6,823  | 63    | 50,971   | 1,606  | 104     | 125          | 18      | -    |
| North B  | 6,849  | 3,248  | 40    | 45,009   | 2,346  | 141     | 123          | 14      | -    |
| Central  | 12,743 | 5,714  | 169   | 67,963   | 4,309  | 148     | 293          | 35      | 43   |
| South    | 3,406  | 3,967  | -     | 8,246    | 1,466  | -       | 64           | -       | -    |
| Urban    | 1,164  | 1,376  | 13    | 57,672   | 7,107  | 32      | 318          | 129     | -    |
| West     | 13,132 | 5,344  | 90    | 94,796   | 8,086  | 69      | 411          | 139     | 23   |
| Total    | 45,750 | 26,472 | 375   | 324,657  | 24,921 | 494     | 1,334        | 335     |      |

Source: Commission for Livestock, Ministry of Agriculture, Livestock and Natural Resources, Zanzibar.

Table 7. Total number of cattle by type and district in Unguja, 1993.

| District     | Exotic | Crossbreeds | Local  | Total  | %     |
|--------------|--------|-------------|--------|--------|-------|
| North-A      | -      | 20          | 8,456  | 8,456  | 18.5  |
| North-B      | 15     | 123         | 6,711  | 6,849  | 15.0  |
| Central      | 189    | 811         | 11,743 | 12,743 | 27.8  |
| South        | -      | 109         | 3,297  | 3,406  | 7.4   |
| Urban        | -      | 191         | 973    | 1,164  | 2.5   |
| West         | 252    | 895         | 11,985 | 13,132 | 28.7  |
| Total Unguja | 456    | 2,149       | 43,145 | 45,750 | 100.0 |
| %            | 1.0    | 4.7         | 94.3   | 100.0  |       |

Source: Commission for Livestock, Ministry of Agriculture, Livestock and Natural Resources, Zanzibar.

### 3.2.1.3. Livestock farms

Apart from the 1978 livestock census, there is no other source known to us that contains farm level data on the livestock situation in Unguja before the tsetse intervention in 1985/86. The most appropriate means of obtaining this information therefore, was through farmer recall of events at that time. The results indicate that 31% of the 1,138 farmers surveyed in 1999 raised indigenous cattle while 2.4% raised crossbred cattle in 1985/86. About 22% raised chickens and 6% raised sheep and goats (Table 8) in 1985/86. Only 1%

had donkeys. The proportion of farms with indigenous cattle varied from 20% in South District to 44% in North-B District. Farms with crossbred cattle were mostly in North-B (17%), West (5%) and Central (3%) Districts. No farm in North-A District had crossbred cattle. Most of the farms with small ruminants were located in North-B and West Districts while those with local chickens were mostly in North-B (49%), North-A (32%) and West (25%) Districts. Over 60% of the farms with improved poultry were in South District. None was present in North-A District.

Table 8. Farmers raising livestock in Unguja, Zanzibar, before tsetse intervention in 1985/86.

| % farms with:     | Central<br>(n=392) | North A<br>(n=65) | North B<br>(n=255) | South<br>(n=186) | West<br>(n=240) | All Districts<br>(n=1,138) |
|-------------------|--------------------|-------------------|--------------------|------------------|-----------------|----------------------------|
| Indigenous cattle | 27.0               | 30.8              | 43.5               | 19.9             | 35.0            | 31.3                       |
| Crossbred cattle  | 2.8                | 0.0               | 16.7               | 1.1              | 5.0             | 2.4                        |
| Sheep and goats   | 2.8                | 1.5               | 13.4               | 1.6              | 7.9             | 5.6                        |
| Local chickens    | 12.5               | 32.3              | 48.9               | 9.1              | 24.6            | 20.6                       |
| Improved chickens | 0.3                | 0.0               | 0.5                | 2.2              | 0.4             | 1.1                        |
| Donkeys           | 1.5                | 0.0               | 0.0                | 0.0              | 0.8             | 1.1                        |

Source: Economic Assessment of Livestock Development on Zanzibar Survey, 1999.

Herd and flock sizes on the sample farms averaged 1.53 indigenous and 0.07 crossbred cattle per farm with standard deviations of 5.3 and 1.5 respectively (Table 9). Indigenous cattle averaged 1.7 per farm in Central, North-B and West Districts with no significant difference among the districts. Apart from West District which had the highest number of crossbred cattle ( $0.2 \pm 1.6$  sd), no significant difference existed among the other districts. Sheep and goats averaged 0.43 per farm with significant variation among districts. North-B had the highest (1.14 sheep/goats) while North-A had the lowest (0.03). Indigenous and improved chickens averaged 4.3 and 3.2 respectively, being highest in North-B District and lowest in South District.

Table 9. Average herd and flock sizes for cattle, sheep and goats, and poultry on Unguja Island, 1985/86.

| District        | Indigenous<br>cattle | Crossbred<br>cattle | Sheep and<br>Goats | Indigenous<br>poultry | Improved<br>poultry |
|-----------------|----------------------|---------------------|--------------------|-----------------------|---------------------|
| Central: Number | 1.73                 | 0.09                | 0.23               | 2.40                  | 0.26                |
| Std. de.        | 7.01                 | 3.03                | 3.22               | 13.48                 | n.a.                |
| North-A: Number | 1.28                 | 0.0                 | 0.03               | 6.51                  | 0.0                 |
| Std. de.        | 4.32                 | 0.0                 | n.a.               | 20.06                 | 0.0                 |
| North-B: Number | 1.74                 | 0.02                | 1.14               | 6.65                  | 6.71                |
| Std. de.        | 4.83                 | 0.71                | 8.96               | 31.93                 | 179.06              |
| South: Number   | 1.20                 | 0.02                | 0.08               | 1.45                  | 0.0                 |
| Std. de.        | 5.02                 | 0.70                | 1.00               | 8.44                  | 0.0                 |
| West: Number    | 1.71                 | 0.16                | 0.65               | 4.49                  | 4.17                |
| Std. de.        | 5.04                 | 1.64                | 6.02               | 14.03                 | n.a.                |
| Average: Number | 1.53                 | 0.07                | 0.43               | 4.30                  | 3.17                |
| Std. de.        | 5.26                 | 1.52                | 4.80               | 17.59                 | n.a.                |

Source: Economic Assessment of Livestock Development on Zanzibar Survey, 1999.



### 3.2.1.4. Livestock species raised and their production and reproduction parameters

The major livestock species raised by stock owners in Unguja, Zanzibar were cattle, goats and poultry (including ducks and Guinea fowls). Only a limited number of sheep (about 2.5% of all small ruminants), donkeys, rabbits and pigs were raised.

#### 3.2.1.4.1. Cattle

Cattle were the most important livestock species raised because of their meat and milk. The indigenous small-sized, small-humped East African short-horn zebu was the dominant breed, making up over 90% of the Island's total cattle population. In 1985/86 the zebu was estimated to produce about 90% of the total domestic milk with a daily yield ranging from 0.8 to 1.2 liters/cow (Grijpma *et al.*, 1982). The lactation length was estimated to be between 150 and 180 days. Data on other reproductive parameters are lacking for Unguja during the 1985/86 period but can well be assumed to be similar to those reported for mainland Tanzania. Calving intervals ranged from 24 to 26 months, age at first calving from 3 to 4 years. Calf mortality averaged 27% and the overall mortality was 7% (Kadigi, 1995). Mature weights for indigenous cattle ranged from 250 to 300 kg with a carcass weight that ranged from 100 to 110 kg.

Before the tsetse intervention in 1985/86 there were very few exotic and crossbred cattle in Unguja. Most of these were available on state farms located in Bambi, Kizimbani and Pangeni. Farm level data on their production and reproduction parameters are not available as the few farms that raised such animals did not keep any records. However, indicative estimates from the Bambi dairy farm which had a higher standard of management than the ordinary smallholder farm show that calving rates averaged 78.5% for the period 1977 to 1985 while calf mortality on average was 26% and cow mortality averaged 4.5% for the same period (Table 10).

Table 10. Calving and mortality rates at the Bambi dairy farm, 1977-1985.

| Year              | Calving rate (%) | Mortality rates (%) |        |
|-------------------|------------------|---------------------|--------|
|                   |                  | Cows                | Calves |
| 1977              | 82.7             | 0                   | 6.2    |
| 1978              | 61.2             | 0                   | 24.4   |
| 1979              | 51.9             | 2.3                 | 20.8   |
| 1980              | 77.9             | 3                   | 24.5   |
| 1981              | 73.7             | 5.4                 | 19.1   |
| 1982              | 88.3             | 4.2                 | 50.2   |
| 1983              | 83.6             | 8.4                 | 32.6   |
| 1984              | 98.2             | 11.5                | 30.9   |
| 1985              | 88.7             | 5.8                 | 25.8   |
| Average 1977-1985 | 78.5             | 4.5                 | 26.1   |

Source: Department of Livestock, MANLR, Zanzibar.

Farm level data on the number of farms producing milk and quantities produced before the tsetse intervention were also not available from secondary sources. Recall information for

1985/86 obtained during the 1999 survey from 166 (15%) livestock farmers who milked their cattle revealed that daily milk yield averaged only 1.0 liters per cow with a standard deviation of 5.4. Milk yield on farms in West and North-B Districts were higher, averaging 1.7 and 1.5 liters respectively compared to only 0.2 liters on farms in South District (Table 11). The large standard errors could have been due to a few farms with higher yields from crossbred and exotic cattle.

Table 11. Milk production at farm level in Unguja, 1985/86.

| District          | % farmers producing milk | Quantity of milk produced (liters/day) |          |
|-------------------|--------------------------|----------------------------------------|----------|
|                   |                          | Quantity                               | Std. de. |
| Central (n=392)   | 14.3                     | 0.8                                    | 5.4      |
| North-A (n=65)    | 10.8                     | 0.5                                    | 4.2      |
| North-B (n=255)   | 24.7                     | 1.5                                    | 4.7      |
| South (n=186)     | 7.0                      | 0.2                                    | 3.6      |
| West (n=240)      | 16.3                     | 1.7                                    | 8.9      |
| Total (n=1,138)   | 14.6                     | 1.0                                    | 5.4      |
| Number of farmers | 166                      |                                        |          |

Source: Economic Assessment of Livestock Development on Zanzibar Survey, 1999.

#### 3.2.1.4.1.1. Cattle herd structure

Reports of the Zanzibar Ministry of Agriculture, Livestock and Natural Resources indicate that in 1978 when the livestock census was conducted, the cattle herd was composed of 42% cows, 23% calves, 21% heifers and 14% bulls. Oxen comprised of an insignificant proportion and considerable variation by region and production system. Quantitative estimates on the dynamics of the cattle herd following the 1978 livestock census are not available. By how much the structure and composition of the cattle herd had changed in 1985/86 is largely unknown. However, according to the herd structure from the 1993 livestock census which comprised of 42% cows, 25% calves, 19% heifers and 14% bulls, it can reasonably be assumed that in 1985/86 no significant change had occurred in the herd structure except for a 2% decline in the proportion of heifers and a 2% increase in the proportion of calves. Calculated calf/cow ratios for the two periods were 0.55 and 0.59 respectively.

#### 3.2.1.4.2. Small ruminants

The small East African goat and the Black Head Persian sheep were the dominant breeds of small ruminants. The sheep are white in color with a black head and fat rump. They are very few and are available mostly on state farms. The goat has a variable body and short horn that curves backwards. Mature weights range from 25 to 30 kg. As good scavengers and tolerant of harsh conditions, they are very prolific, mature quickly and have 3 kiddings within 2 years. They reach slaughter weight in 8 to 12 months and produce a carcass yield of between 10 and 12 kg (MALNR, 1995).

### 3.2.1.4.3. Poultry

The people of Unguja raised mostly local chickens as well as other poultry species such as Guinea fowls and Muscovy ducks. The local chicken exhibits a lot of genetic variation with mature males weighing between 1.2 to 1.4 kg and females weighing 0.9 to 1.1 kg. Guinea fowls are grey in color and weigh about 1.5 kg at maturity. Muscovy ducks show considerable variation in color with males weighing 2-2.5 kg and females 1.3-1.7 kg at maturity (MALNR, 1995). Available breeds for broiler production are the Light Sussex while the Rhode Island Red is used for egg production.

### 3.2.1.4.4. Donkeys

Donkeys are of the common African grey type. They are hardy, resistant and tolerant of many common diseases and thrive on poor quality diet obtained by scavenging on local feed resources. They are mostly used for transportation of all kinds of items ranging from feeds, cash and food crops as well as water.

### 3.2.1.5. Dairy production, processing and marketing

At farm level, the productivity of dairy cattle in Unguja before and during the tsetse intervention in 1985/86 was quite low. According to estimates provided by Grijpma *et al.* (1982), total daily milk production was 48,000 liters in 1985 with only 7% being produced on state farms and the rest by traditional smallholders. In 1985 total milk available for processing by the dairy plant located at Mapinduzi was estimated at about 2 million liters, averaging 2.2 million liters per year between 1980 and 1985 (Table 12). Most of the milk did not come from local production, but as powder milk from the World Food Program (WFP). The milk was reconstituted and processed into dairy products for sale; the proceeds of which were intended for developing the local dairy industry. During 1985/86, about 4.8 million TShs were generated as sales from reconstituted milk powder. Since the plant relied heavily on milk powder and butter oil, and milk sourced from smallholders was low partly due to the fixed milk price and lack of an organized milk collection system, quantities of dairy products processed through this plant fluctuated significantly.

Table 12. Milk and milk products produced by the Zanzibar Dairy Corporation, 1977-1985.

| Year | Milk<br>(1,000 Litres) | Butter<br>(Kg) | Ghee<br>(Litres) | Yoghurt<br>(Litres) | Cream<br>(Litres) |
|------|------------------------|----------------|------------------|---------------------|-------------------|
| 1977 | 204                    | 475            | 5,040            | 10,232              | 34                |
| 1978 | 641                    | 2,370          | 17,035           | 13,885              | 981               |
| 1979 | 1,442                  | 7,766          | 9,247            | 29,161              | 434               |
| 1980 | 1,896                  | 7,969          | 8,020            | 41,501              | 16                |
| 1981 | 2,325                  | 8,978          | 141              | 45,580              | 29                |
| 1982 | 2,719                  | 8,789          | 7,830            | 11,900              | 177               |
| 1983 | 1,813                  | 8,442          | 1,510            | 8,905               | 3,022             |
| 1984 | 2,510                  | 8,545          | 1,951            | 67,698              | 49,234            |
| 1985 | 2,134                  | 8,465          | 697              | 81,885              | 26,865            |

Source: Department of Livestock, MALNR, 1995

In rural areas production and marketing of milk and dairy products was mostly by smallholders through informal channels. There was no processing of the milk produced by smallholders and no formal milk marketing channels existed despite the presence of the Mapinduzi Dairy Plant. According to results of the survey, 11% (121) of the sample farms reported selling milk during 1985/86 and the average quantity sold per farm was 0.7 liters (Table 13). North-B District had the largest proportion (20.4%) of farmers selling milk followed by West District (14.6%) and lastly by South District (1.1%). West and North-B Districts reported higher than average milk sales of 1.4 litres/farm and 1.1 litres/farm respectively. Farmers in these districts also produced more milk than those in the other districts. In addition, their relative proximity to the large urban market of Zanzibar town could have contributed to more milk being sold than for the rest of the districts.

Table 13. Milk sales from indigenous cattle in Unguja, 1985/86.

| District          | % farmers who sold milk | Quantity of milk sold (litres/day) |          |
|-------------------|-------------------------|------------------------------------|----------|
|                   |                         | Quantity                           | Std. de. |
| Central (n=392)   | 10.7                    | 0.6                                | 5.1      |
| North-A (n=65)    | 6.2                     | 0.3                                | 4.6      |
| North-B (n=255)   | 20.4                    | 1.1                                | 4.3      |
| South (n=186)     | 1.1                     | 0.1                                | 11.0     |
| West (n=240)      | 14.6                    | 1.4                                | 8.8      |
| Total (n=1,138)   | 10.6                    | 0.7                                | 6.8      |
| Number of farmers | 121                     |                                    |          |

Source: Economic Assessment of Livestock Development on Zanzibar Survey, 1999.

### 3.2.1.6. Livestock disease situation

Before and during the tsetse intervention in 1985/86, livestock in Unguja suffered from a variety of diseases. Trypanosomosis was the most important disease in terms of the losses it caused. Ticks and tick-borne diseases such as East Coast Fever (ECF), Babesiosis and Heartwater were of equal importance. Foot and Mouth Disease, Lumpy Skin Disease, Contagious Caprine Pleuropneumonia (CCPP), Newcastle Disease and African Swine Fever also caused important losses in livestock. Apart from trypanosomosis and ECF for which there exist some data on their impacts on cattle in Unguja, information on the effects of the other animal diseases is unavailable for 1985/86. Mortality from ECF was estimated to vary from 6% to 29% for zebu cattle while for crossbred cattle, mortality was as high as 31% (URT, 1987). Control of ECF and other tick borne diseases was hampered by lack of an effective dipping system and shortages of acaricides. The devastating effects of tsetse and trypanosomosis on cattle in Unguja before the intervention in 1985/86 warrants that the disease be examined more closely.

#### 3.2.1.6.1. Tsetse and Trypanosomosis in Unguja, Zanzibar.

The tsetse fly is a vector of a parasitic disease -- trypanosomosis. It belongs to the genus *Glossina*. The causative organism of trypanosomosis is a parasitic protozoa found in the

blood and tissues of its host. The thirty species or sub-species so far identified are specific to tropical Africa (covering some 11 million km<sup>2</sup>) and are classified under three major groups -- *fuscus* (forest), *palpalis* (riverine) and *morsitans* (savannah) (Jordan, 1986; Putt *et al.*, 1980). Fly species within each group are responsible for animal and/or human trypanosomosis (sleeping sickness). However, the rate of infection with trypanosomosis varies from one specie to another and from one locality to the other; the establishment of trypanosome infection being influenced by the ecology, the parasite and its host, and the fly itself (Molyneux, 1977). Overall, infection rates are lower in the *fuscus* and *palpalis* groups than in the *morsitans* group (Jordan, 1986).

Vast areas of the African continent that are inhabited by human and livestock populations are infested with the tsetse fly. Unguja island of Zanzibar was infested with the tsetse fly for over a century. The historical evidence indicates that the island was infested only with animal trypanosomosis caused by *Glossina austini* and not human trypanosomosis. Although first diagnosed in Unguja in 1908, animal trypanosomosis had existed as far back as 1880 (Turner, 1984). The incidence however, assumed greater significance due to the changing socio-economic circumstances that accompanied the abolition of slave trade in 1897.

Until the first tsetse fly *G. austeni* was caught in a diary herd at Chukwani in 1945, it was believed during the first half of the century that trypanosomosis in Unguja was caused by *Stomoxys*. The tsetse surveys conducted by the East African Trypanosomosis Research Organisation between 1945 and 1950 revealed that the tsetse fly was widely present in western Zanzibar, notably in Mwera, Mbusini, Donge, Mwangini, Mangapwani and Kizimbani. Of the 8,000 cattle surveyed for trypanosomosis at the time, 17% diagnosed positive with *T. congolense* or *T. vivax*. The comprehensive tsetse survey conducted between 1948 and 1951 and subsequent mapping of the areas showed an island-wide presence of *G. austeni* with major concentrations in the Jozani forest in the eastern part of the island (Figure 1 Annex 6). The incidence of trypanosomosis was greatest at that time in the wet season when flies were widely dispersed.

Other studies conducted between 1981 and 1983 showed that trypanosomosis was highly prevalent in known endemic areas and even in areas hitherto considered to be free from the disease. In Mangapwani, infection rates were as high as 60% and 43% in Kinyasini in the north and Muyuni in the south of the island (FAO, 1987, pp. 16-17). Surveys of cattle conducted between 1985 and 1987 revealed a peak prevalence rate of 39% in Jozani forest in November 1985 and 63% in Mgeni Haji in January 1987 (Figure 1 Annex 6). By March 1987, the distribution of tsetse was as shown in Table 14. Cases of trypanosomosis were identified in several villages in North-B, West and Central Districts. Prevalence rates in excess of 30% were also reported in several villages in North-B, Central and South Districts. Other trials conducted between 1985 and 1987 showed that goats, sheep and donkeys were affected as well. Goats, sheep and donkeys sampled in trypanosomosis endemic areas showed that 13%, 6% and 8% were trypanosomosis positive respectively (Hafidh *et al.*, 1987, p. 20). Although data are inadequate, it is highly believed by the

Zanzibar authorities that antelopes and bush pigs are possible reservoirs for trypanosomosis.

Table 14. Prevalence of cattle trypanosomosis in Unguja Island, Zanzibar, March 1987 before the initiation of the Animal Disease Control Project.

| District  | Prevalence rate             |                                        |                                    | Areas with identified cases of trypanosomosis |
|-----------|-----------------------------|----------------------------------------|------------------------------------|-----------------------------------------------|
|           | 1-10%                       | 11-30%                                 | > 30%                              |                                               |
| North "B" | Kitope<br>Mahonda           | Zingwasingwe<br>Kiomba-mvua<br>Mkadini | Misufini<br>Mangapwani<br>Fujoni   | Makoba<br>Mgambo<br>Pangeni                   |
| West      |                             |                                        |                                    | Mfenesini                                     |
| Central   | Tunguu<br>Jendele<br>Umbuji | Chwaka<br>Mgeni Hai<br>Unguja-Ukuu     | Mchangani<br>Tunduni               | Ukongoroni<br>Charawe<br>Donga Bweni          |
| South     |                             |                                        | Pete<br>Muugoni<br>Muyuni A, B & C |                                               |

Source: Compiled from Hafidh et al., 1987. Appendix 5.

### 3.2.1.6.2. Tsetse and trypanosomosis control measures

The first major public attempt to control tsetse and trypanosomosis in Unguja started in the 1950s. The control method focused on tsetse reclamation in the high risk areas of Mangapwani in western Zanzibar. However, as trypanosomosis remained a recurring problem of unknown magnitude and economic importance, the need for better understanding of the tsetse and trypanosomosis situation became imperative as a basis for determining the feasibility and desirability of putting in place an eradication program for *G. austeni*. Based on the recommendations of a number of consultancy missions by Jordan and USAID in 1978 and FAO in 1981 on the control and eradication of *G. austeni* from Zanzibar (Le Roux, 1981), a number of trypanosomosis surveys were commissioned between 1981 and 1983. In 1981 it was shown that the incidence of trypanosomosis on the island was 5%. The subsequent surveys of 1982 and 1983 revealed an overall trypanosomosis prevalence of 3.1% and 4.3% respectively with a prevalence of 10.6% in Mangapwani and 13.6% in Muungoni where small but long-standing foci of fly were present (Table 15). Late in 1982 personnel from the Tsetse and Trypanosomiasis Institute (TTRI) in Tanga, Tanzania thoroughly surveyed known areas of disease in Jozani forest with the view to setting up a herd trial for the use of the sterile insect technique. The puparia collected from Jozani forest were used to start a colony of *G. austeni* at Tanga for eventual mass production. Based on results of the trials and surveys conducted at Jozani forest and Mangapwani between March and October 1983, major decisions for launching an island-wide campaign for the eradication of trypanosomosis were arrived at.

Prior to a request by the Zanzibar Ministry of Agriculture and Livestock for external assistance, control efforts were made under Project URT/73/025 -- Livestock Production, Phase I-- from 1976 to 1978. This project focused mostly on tick control, training and general husbandry at smallholder level. Project URT/78/028 -- Livestock Production,

Phase II -- concentrated on veterinary assistance, breeding, forage production and pasture improvement from 1979 to 1981. Project DP/URT/81/017 -- Livestock Development Phase III -- which was implemented from 1982 to 1986 concentrated on the baseline activities established during Phases I and II, aiming, overall, at raising the productivity of smallholder farms through training in integrated crop and livestock farming (1982-83), training in artificial insemination (1984-85) and the development of disease diagnostic facilities (1985-86) (FAO, 1987).

Given the major challenge from trypanosomosis, the Zanzibar Ministry of Agriculture and Livestock in 1985 requested for assistance from FAO to collect background information on trypanosomosis that could be used to formulate a strategy for its eradication. Two years of data collection by FAO provided background information for the formulation of a pilot trial for the control of *G. austeni* (Bouvry, 1986). The trial was implemented under FAO TCP Project AG:TCP/URT/6758 on the Island of Unguja to test the feasibility and identify a method for the control and possible eradication of trypanosomosis. The technique, which was later to be applied to the entire island, involved the treatment of livestock, mainly cattle, with sequential application of the residual pour-on acaricide deltamethrin.

Following a Government of Tanzania (GoT) request for UNDP assistance in early 1987 to control animal diseases, notably ECF, tsetse and trypanosomosis and other animal diseases, the Animal Disease Control Project, Zanzibar (Project AG:DP/URT/86/022) was negotiated and became operational in March 1988. Phase I covered the period from March 1988 to September 1991. Phase II, which included the island of Pemba, began in October 1991 and ended in December 1993. Building on the results of the pilot trial for the control of *G. austeni*, the Animal Disease Control Project succeeded in reducing the apparent density of *G. austeni* to zero level after application of five, six or more insecticide treatments. Routine post treatment monitoring of both fly and disease in animals in the Jozani and Ufufuma forest areas using "sticky targets" and treatment of trypanosome infected animals showed that the feasibility of using insecticide-treated livestock for the control and possible eradication of *G. austeni* was not only effective but farmer friendly.

Table 15. Prevalence of cattle trypanosomosis in Unguja, Zanzibar, 1982 to 1984.

| District       | Cattle population | Cattle density (no./km <sup>2</sup> ) | Area surveyed | Prevalence of cattle trypanosomosis |
|----------------|-------------------|---------------------------------------|---------------|-------------------------------------|
| North A        | 6,330             | 27                                    | Mokotoni      | 0%                                  |
| North B        | 2,763             | 13                                    | Mangapwani    | 10.6%                               |
|                |                   |                                       | Pangeni       | 0%                                  |
| West and Urban | 10,152            | 34                                    | Mtoni         | 0%                                  |
|                |                   |                                       | Mbweni        | 0%                                  |
| Central        | 6,013             | 13                                    | Bambi         | 6.8%                                |
|                |                   |                                       | Tunguu        | 2.8%                                |
| South          | 2,013             | 6                                     | Muongoni      | 13.6%                               |
|                |                   |                                       | Makunduchi    | 0%                                  |

Source: Compiled from figures reported in Turner, 1984.

### 3.2.1.6.3. Tsetse and trypanosomosis eradication using the Sterile Insect Technique (SIT) in Unguja.

The SIT is an *auticide* genetic method of pest control which aims at suppressing the reproduction potential of the female pest such that its control or its total eradication is achieved within a given geographical area. The SIT is based on the release of sufficient males of the pest species, bred and sterilized in the laboratory, yet capable of copulating or inseminating, into a population of this species so that they compete with the fertile males for the females to be fertilized. The sterilized male population is increased at a rate such that the reproductive potential of the fertile females is severely impaired to permit an eradication of the pest within the area concerned. Once eradicated, efforts (e.g. creation of barrier systems) to sustain the achieved eradication must be put in place.

Initial application of the SIT was in the control and eradication of the screw-worm fly (Baumhover *et al.*, 1955; Knippling, 1960) and the Mediterranean fruit fly (Langley *et al.*, 1972; Spharim, 1974). The first application of the SIT to tsetse eradication in Africa was in 1981 when the technique was used in the Sideradougou area of Burkina Faso. Eradication of the tsetse fly by the SIT method is facilitated by the particular biological characteristics of the tsetse fly. For an insect, the tsetse's reproduction rate of one larva every ten days per reproductive female coupled with the female's ability to mate only once in the first days after hatching and to remain sterile for life following insemination by a sterile male is exceedingly good for eradication. Areas cleared of tsetse flies using the SIT need to either have effective natural barriers or be protected from renewed invasion through insecticide-impregnated traps placed at close intervals along the path of invasion. Unguja has been a very favorable site for the use of the SIT because of its unique status as an island and the presence of only one species of tsetse -- *G. austeni* -- which do not transmit human trypanosomosis.

Before the initiation of the tsetse eradication program using the sterile insect technique in 1994, recurrent measures were undertaken by UNDP/FAO to limit the number and distribution of tsetse and thus decrease the trypanosomosis challenge in the highly infested areas of Zanzibar. The measures typically involved the application of "pour-ons" -- pyrethroid and deltamethrin insecticides -- to eliminate flies from areas of intensive land use and the use of cloth screens impregnated with pyrethroid and deltamethrin insecticides, placed along transects at a density of 30 to 40 per km<sup>2</sup> to reduce the fly density. The use of "pour-ons" led to the reclamation of some 700 km<sup>2</sup> by the end of 1992 within the less infested areas. The method however, was less successful in eliminating flies from the forests and dense thickets in the south of the island. In an area of 8 km<sup>2</sup> of the Jozani forest the use of impregnated screens reduced the fly density by about 85-90%. In the northern part of the island, screens placed at 50 per km<sup>2</sup> succeeded in reducing the fly population by 90% and the fly density from 3 to 0.3 flies/trap/day by April 1993 (UNDP/FAO, 1998, p. 6). While these control methods were on-going, infected animals were treated by dipping with deltamethrin acaricide. In Unguja as a whole, the use of chemoprophylactic methods to reduce fly population and the treatment of animals using



chemotherapeutic drugs reduced the disease incidence and therefore led to an overall improvement to the livestock industry.

The drastic reduction in apparent fly density achieved under the UNDP/FAO Animal Disease Control Project by the end of 1993 provided a fertile ground for the application of the sterile insect technique (SIT) as a method for final eradication of *G. austeni*. In January 1994 the SIT was introduced under the International Atomic Energy Agency (IAEA) Project URT/5/016 which then officially took over from the UNDP/FAO Animal Disease Control Project URT/91/006 in January 1994.

#### **3.2.1.6.4. Farmer awareness of trypanosomosis and its impact.**

To determine the extent to which farmers were aware of tsetse and trypanosomosis and how well they co-operated in the fight against the disease, the 1999 survey found that 87% of the sample farmers knew something about tsetse and trypanosomosis before the intervention in 1985/86 (Table 16). About 11% know nothing about the disease while the rest failed to respond. There were no significant differences among the districts in the proportion of farmers who knew something about the disease. Forty eight percent of the farmers sought for measures to prevent and/or treat against trypanosomosis while 44% did nothing about the disease. For those who took measures to prevent the disease, insecticide application was the sole method of prevention while for those who treated their animals, use of trypanocidal drugs (32%) such as Berenil and Samorin was the common method of treatment. Less than 1% combined the use of ethnoveterinary drugs with other methods of treatment. It should be noted that although a few farmers made individual efforts to fight against the disease, prevention and treatment was largely carried out free of charge for farmers by the IAEA and FAO/UNDP tsetse control projects which eventually led to final eradication of tsetse and trypanosomosis from Zanzibar.

Table 16. Farmer awareness of tsetse and trypanosomosis and methods used to prevent and/or treat trypanosomosis prior to eradication in Unguja, Zanzibar.

|                                                        | District           |                   |                    |                  |                 | All districts<br>(n=1,138) |
|--------------------------------------------------------|--------------------|-------------------|--------------------|------------------|-----------------|----------------------------|
|                                                        | Central<br>(n=392) | North-A<br>(n=65) | North-B<br>(n=255) | South<br>(n=186) | West<br>(n=240) |                            |
| Farmers who are aware of tsetse and trypanosomosis (%) |                    |                   |                    |                  |                 |                            |
| Yes                                                    | 91.10              | 83.10             | 87.10              | 91.90            | 82.50           | 87.1                       |
| No.                                                    | 8.20               | 15.40             | 11.80              | 1.10             | 15.80           | 10.5                       |
| Non-responses                                          | 0.70               | 1.50              | 1.10               | 7.00             | 1.70            | 2.4                        |
| Farmers who prevent and/or treat Trypanosomosis: (%)   |                    |                   |                    |                  |                 |                            |
| Yes                                                    | 42.5               | 32.3              | 47.1               | 76.3             | 44.2            | 48.5                       |
| No.                                                    | 50.5               | 60.0              | 43.9               | 13.4             | 52.1            | 44.0                       |
| Non-responses                                          | 7.0                | 7.7               | 9.0                | 10.3             | 3.7             | 7.5                        |
| Farmers who use this method of prevention:             |                    |                   |                    |                  |                 |                            |
| Bush clearing                                          | 0.0                | 0.0               | 4.0                | 0.0              | 0.0             | 4.0                        |
| Use of traps                                           | 0.0                | 0.0               | 0.0                | 0.0              | 0.0             | 0.0                        |
| Use of insecticides                                    | 41.4               | 32.3              | 47.1               | 73.7             | 43.8            | 47.7                       |
| Avoidance of infested animals                          | 0.0                | 0.0               | 0.0                | 0.0              | 0.0             | 0.0                        |
| Use of trypanotolerant animals                         | 0.0                | 0.0               | 0.0                | 0.0              | 0.0             | 0.0                        |
| Raising other animals species                          | 0.0                | 0.0               | 0.0                | 0.0              | 0.0             | 0.0                        |
| Non-responses                                          | 58.6               | 63.7              | 48.9               | 26.3             | 56.2            | 50.7                       |
| Farmers who use this method of treatment:              |                    |                   |                    |                  |                 |                            |
| Use of trapanocidal drugs                              | 27.4               | 27.7              | 43.5               | 23.7             | 38.8            | 32.2                       |
| Use of Ethnoveterinary drugs                           | 0.0                | 0.0               | 0.0                | 0.0              | 0.4             | 0.4                        |
| Others                                                 | 0.0                | 0.0               | 0.0                | 0.5              | 0.4             | 0.5                        |
| Non-responses                                          | 72.6               | 72.3              | 56.5               | 75.8             | 60.4            | 67.5                       |

Source: Economic assessment of livestock development on Zanzibar survey, 1999.

### 3.2.1.6.4.1. Impact on cattle production

Although adequate information is available on the prevalence of trypanosomosis in each of the Island's districts, exactly how many farms were affected before the intervention is largely unknown. On average, 54% of the sample farmers reported their farm plots to have been infested by tsetse in 1985/86 (Table 17). The proportion of farms infested varied significantly among the districts, being quite high in South District (86%) and as low as 8% in North-A District. For the infested farms, only 2.3% reported to have abandoned their plots due to tsetse flies. For those who continued to use the infested plots, 51% used them to raise livestock whereas 49% used them for crop production.

Table 17. Farms plots affected by tsetse prior to eradication in Unguja, Zanzibar.

|                                                | District           |                   |                    |                  |                 | All districts<br>(n=1,138) |
|------------------------------------------------|--------------------|-------------------|--------------------|------------------|-----------------|----------------------------|
|                                                | Central<br>(n=392) | North-A<br>(n=65) | North-B<br>(n=255) | South<br>(n=186) | West<br>(n=240) |                            |
| Farm plots infested by trypanosomosis (%)      |                    |                   |                    |                  |                 |                            |
| Yes                                            | 66.30              | 7.70              | 45.50              | 85.50            | 63.80           | 53.8                       |
| No                                             | 30.10              | 90.80             | 43.10              | 7.50             | 34.20           | 41.1                       |
| Farm plots abandoned due to trypanosomosis (%) |                    |                   |                    |                  |                 |                            |
| Yes                                            | 1.8                | 0.0               | 1.6                | 3.2              | 2.5             | 2.3                        |
| No                                             | 92.3               | 90.8              | 89.4               | 76.9             | 85.4            | 87.0                       |
| Farm plots used for raising livestock (%)      |                    |                   |                    |                  |                 |                            |
| Yes                                            | 66.10              | 6.20              | 40.80              | 79.60            | 62.10           | 51.0                       |
| No.                                            | 14.00              | 24.60             | 16.50              | 5.40             | 0.80            | 12.3                       |
| Farm plots used for crop production (%)        |                    |                   |                    |                  |                 |                            |
| Yes                                            | 65.10              | 7.70              | 30.90              | 83.90            | 59.60           | 49.4                       |
| No.                                            | 15.10              | 12.30             | 13.30              | 1.60             | 0.00            | 10.6                       |

Source: Economic assessment of livestock development on Zanzibar survey, 1999.

The effect of tsetse infestation was the transmission of animal trypanosomosis to cattle which greatly reduced their productivity and eventually led to deaths when not treated. According to the survey results, 10.2% of the sample farmers reported their cattle to have been infected by trypanosomosis. Among the farms with infected cattle, 42% lost cattle (Table 18). Compared to the entire sample, 4.3% of the farms lost cattle due to trypanosomosis. The number of cattle infected with trypanosomosis was estimated at 0.48, which is 31% of the estimated average herd size of 1.53 cattle per farm. Of the infected cattle, about 76% were reported to have died as a result of trypanosomosis. When compared with the average herd size, it was estimated that 23.5% of the cattle died as a result of trypanosomosis. This estimate falls within the range of 17 to 25% reported by the GURT/FAO/IAEA (1994) Tsetse Fly Eradication on Zanzibar, URT/5/016 Project Document). The amount of weight loss incurred by the infected cattle could not be established as farmers did not weigh their animals. Of the 29 farms sampled with crossbred cattle, 21% reported having infected cattle. The number of crossbred cattle lost due to trypanosomosis could not also be established from the survey results.

Table 18. Effect of trypanosomosis on cattle production before tsetse control/eradication in Unguja, Zanzibar.

| Effect of trypanosomosis                           | District           |                   |                    |                  |                 | All districts<br>(n=1,138) |
|----------------------------------------------------|--------------------|-------------------|--------------------|------------------|-----------------|----------------------------|
|                                                    | Central<br>(n=392) | North-A<br>(n=65) | North-B<br>(n=255) | South<br>(n=186) | West<br>(n=240) |                            |
| Number of cattle farms affected                    | 30                 | 15                | 34                 | 8                | 29              | 116                        |
| % of cattle farms affected                         | 7.6                | 23.1              | 13.3               | 4.3              | 12.1            | 10.2                       |
| Number of affected farms losing cattle             | 20                 | 15                | 7                  | 3                | 4               | 49                         |
| Farms losing cattle as % of affected cattle farms  | 66.7               | 100.0             | 20.6               | 37.5             | 13.8            | 42.2                       |
| Farms losing cattle as % of total cattle farms     | 5.1                | 23.1              | 2.7                | 1.6              | 1.7             | 4.3                        |
| Average herd size                                  | 1.73               | 1.28              | 1.74               | 1.20             | 1.71            | 1.53                       |
| Number of cattle affected                          | 0.55               | 0.02              | 0.60               | 0.77             | 0.54            | 0.48                       |
| Cattle affected as % of herd size                  | 31.80              | 1.56              | 34.48              | 64.17            | 31.58           | 31.37                      |
| Number of cattle dead                              | 0.26               | 0.00              | 0.22               | 0.52             | 0.44            | 0.36                       |
| Dead cattle as % of affected cattle                | 48.00              | 0.00              | 36.80              | 67.50            | 81.00           | 76.20                      |
| Dead cattle as % of total cattle                   | 15.02              | 0.00              | 12.64              | 43.33            | 25.73           | 23.53                      |
| Number of farms with crossbred cattle              | 11                 | 0                 | 4                  | 2                | 12              | 29                         |
| Farms with crossbred cattle affected               | 4                  | 0                 | 1                  | 0                | 1               | 6                          |
| Affected farms as % of farms with crossbred cattle | 36.4               | 0.0               | 25.0               | 0                | 8.3             | 20.7                       |

Source: Economic assessment of livestock development on Zanzibar survey, 1999.

### 3.2.1.6.4.2. Impact on milk production

As far as the effect of trypanosomosis on milk production is concerned, 114 farms (10%) with milking cows (mostly indigenous) reported a reduction in milk production from the pre-infection to the post-infection period. Milk production dropped from an average of 1.0 liter per cow before infection to 0.44 liters per cow after infection, a reduction equivalent to 56% (Table 19). For the 10 farms that produced milk from crossbred dairy cattle, milk production was reported to have decreased from an average of 7.8 liters per cow before infection to 2.4 liters per cow post-infection, or a reduction equivalent to 69% (Table 20).

Table 19. Effect of trypanosomosis on farms producing milk from indigenous cattle in Unguja, Zanzibar.

| Cattle farms with lactating cows affected by trypanosomosis | District        |                |                 |               |              | All districts (n=1,138) |
|-------------------------------------------------------------|-----------------|----------------|-----------------|---------------|--------------|-------------------------|
|                                                             | Central (n=392) | North-A (n=65) | North-B (n=255) | South (n=186) | West (n=240) |                         |
| Yes                                                         | 8.9             | 4.6            | 14.1            | 6.5           | 15.8         | 10.0                    |
| No.                                                         | 76.3            | 67.7           | 62.4            | 80.6          | 75.0         | 72.4                    |
| Non-responses                                               | 14.8            | 27.7           | 23.5            | 12.9          | 9.2          | 17.6                    |
| Milk production:                                            |                 |                |                 |               |              |                         |
| Before infection (liters/cow)                               | 0.80            | 0.50           | 1.50            | 0.20          | 1.70         | 1.00                    |
| After infection (liters/cow)                                | 0.29            | 0.25           | 0.67            | 0.09          | 0.71         | 0.44                    |
| Change in production (liters/cow)                           | -0.51           | -0.25          | -0.83           | -0.10         | -0.99        | -0.56                   |
| % Change                                                    | -63.6           | -50.0          | -55.3           | -52.6         | -58.3        | -56.0                   |

Source: Economic assessment of livestock development on Zanzibar survey, 1999.

Table 20. Effect of trypanosomosis on farms producing milk from improved dairy cattle in Unguja, Zanzibar.

| Dairy farms with lactating cows affected by trypanosomosis | Dairy farmers responding |       |
|------------------------------------------------------------|--------------------------|-------|
|                                                            | Number                   | %     |
| Yes                                                        | 10                       | 18.5  |
| No.                                                        | 41                       | 76.0  |
| Non-responses                                              | 3                        | 5.5   |
| Milk production:                                           |                          |       |
| Before infection (liters/cow)                              |                          | 7.8   |
| After infection (liters/cow)                               |                          | 2.4   |
| Change in production (liters/cow)                          |                          | -5.4  |
| % Change                                                   |                          | -69.2 |

## 3.2.2. Crop production

### 3.2.2.1. Crop production systems

#### 3.2.2.1.1. Tree crop production

The main tree crops are cloves and coconuts. Minor tree crops are mangoes and citrus trees. Tree crops are normally intercropped with other trees and food crops. Time series data on tree crop production were only available for cloves. Cloves has been the major cash crop of Zanzibar. Its production has been declining during the last two decades (Annex 7 Tables 1 and 3). Average annual production for the ten year period before tsetse intervention in 1985/86 was 6,275 tons (Table 21). Average production for the period between 1985/86 and 1996/97 was 6,065 tons, a decline equivalent to 3% (Table 21). The decline in cloves production is attributed to ageing of clove trees, diseases, and low clove prices leading to replacement of cloves with other cash crops.

#### 3.2.2.1.2. Food crop production

Roots and tubers such as cassava, sweet potatoes, yams and tania (cocoyams) are the dominant food crops in Zanzibar. Other food crops are cereals (maize, rice and sorghum), banana, legumes (cowpeas, pigeon peas and green gram), and vegetables (Annex 7 Tables 1 to 4). Rice is normally grown in pure stand (monocropped). The other food crops can be grown as sole crops or intercropped.

Cassava is the main root crop in Zanzibar. The crop is normally intercropped and typical crop mix comprises of cassava intercropped with sweet potatoes. Estimated area under cassava and cassava output have been fluctuating. Average annual cassava production for ten years before 1985/86 season was 251,049 tons (Table 12). Average production for the period between 1985/86 and 1996/97 was 147,971 tons. Area under cassava production averaged 55,231 hectares and 36,565 hectares for the period before and after 1985/86, respectively. Pests and disease attack is the major constraint to cassava production in Zanzibar. The major pests are mites and cassava mealy bug and major diseases are brown streak, mosaic and cassava blight.

Sweet potatoes is the second most important root crop in Zanzibar. It is either grown as a sole crop or intercropped with other crops such as cassava. Area under sweet potatoes and output have been fluctuating especially for the period 1985/86 to 1996/97. Average area under sweet potatoes for ten years before 1985/86 season was 14,197 hectares per annum and 9,495 hectares per annum for the period 1985/86 to 1996/97. Annual sweet potato output averaged 38,717 tons for ten year period before 1985/86 and 23,121 tons for the period between 1985/86 and 1996/97 (Table 21). The major constraints to sweet potato production in Zanzibar are shortage of planting materials and poor storage facilities. Pest incidences are low and sweet potato weevil is the only common pest, which can be avoided through early planting.

Yams and cocoyams (other root crops) production has been fluctuating, showing a general declining trend in acreage and output over the period 1985/86 to 1996/96. Area under yams and cocoyams averaged 4,948 hectares per annum for ten years before 1985/86 and 2,635 hectares per annum between 1985/86 and 1996/97. Annual output averaged 19,404 tons for ten years before 1985/86 and 9,955 tons between 1985/86 and 1996/97. These crops are drought resistant and there are no major pests and diseases affecting them.

Table 21. Changes in crop production in Unguja, Zanzibar, 1975/76 to 1996/97.

| Type of crop                                                            | Before tsetse intervention<br>(Average annual for the<br>period 1975/76 to<br>1985/86) |         | During tsetse<br>control/eradication<br>(Average annual for the<br>period 1986/87 to<br>1996/97) |         | % change |        |
|-------------------------------------------------------------------------|----------------------------------------------------------------------------------------|---------|--------------------------------------------------------------------------------------------------|---------|----------|--------|
|                                                                         | Hectares                                                                               | Output  | Hectares                                                                                         | Output  | Hectares | Output |
| Cloves                                                                  | n.a.                                                                                   | 6,275   | n.a.                                                                                             | 6,065   | n.a.     | -3.3   |
| Cassava                                                                 | 55,231                                                                                 | 251,049 | 36,565                                                                                           | 147,971 | -33.8    | -41.1  |
| Maize                                                                   | 9,796                                                                                  | 3,561   | 5,823                                                                                            | 1,021   | -40.6    | -71.3  |
| Rice                                                                    | 28,372                                                                                 | 19,360  | 22,590                                                                                           | 15,826  | -20.4    | -18.3  |
| Banana                                                                  | 17,973                                                                                 | 81,695  | 8,191                                                                                            | 33,356  | -54.4    | -59.2  |
| Sorghum                                                                 | 7,075                                                                                  | 1,929   | 2,376                                                                                            | 333     | -66.4    | -82.7  |
| Legumes                                                                 | 10,231                                                                                 | 1,881   | 8,693                                                                                            | 1,308   | -15.0    | -30.5  |
| Sweet potato                                                            | 14,197                                                                                 | 38,717  | 9,495                                                                                            | 23,121  | -33.1    | -40.3  |
| Other roots and tubers                                                  | 4,948                                                                                  | 19,404  | 2,635                                                                                            | 9,955   | -46.7    | -48.7  |
| Total land area under<br>agricultural<br>production (Km <sup>2</sup> ): |                                                                                        |         |                                                                                                  |         |          |        |
| Unguja                                                                  | 63,770                                                                                 |         | 52,264                                                                                           |         | -18.0    |        |
| Zanzibar                                                                | 131,570                                                                                |         | 122,566                                                                                          |         | -6.8     |        |

Source: Averages and percentages are computed from Ministry of Agriculture statistics, Zanzibar.

Rice is one of the most important food items in Zanzibar. It is produced under rainfed and irrigation conditions with rainfed rice being more important than irrigated rice in terms of acreage and output. Total area under rice and rice output remained almost constant for five year period before 1985/86 and fluctuated slightly between 1985/86 and 1996/96. Area under rice production averaged 28,372 hectares for ten year period before 1985//86 and averaged 22,590 hectares per annum between 1985/86 and 1996/97. Output averaged 19,360 tons per annum for ten year period before 1985/86 and averaged 15,826 tons per annum between 1985/86 and 1996/97 (Table 21). Constraints to rice production include pests and diseases, and poor post harvest technologies which lead into substantial losses.

Maize is an important crop for roasting and for making thick porridge. Area under maize production averaged 9,796 hectares per annum for ten year period before 1985/86 and 5,823 for the period 1985/86 to 1996/97. Annual maize output averaged 3,561 tons for ten year period before 1985/86 and 1,021 tons between 1985/86 and 1996/97. The major constraint to maize production is insect and disease attack. Armyworms, stem borer are the major insects while major diseases are maize streak and white leaf blight.

Sorghum is a drought resistant food crop commonly grown in coral and sub-coral rag areas. Area under sorghum averaged 7,075 hectares per annum for ten year period before 1985/86 and 2,376 hectares per annum between 1985/86 and 1996/7. Output averaged 1,929 tons per annum for ten year period before 1985/86 and 333 tons between 1985/86 and 1996/97.

Banana and plantains are widely grown in Zanzibar. Production of banana and plantains is largely affected by diseases, the major disease being Black Sigatoka. Both area under banana production and output have been fluctuating. Area under banana and plantains averaged 17,739 hectares per annum for ten year period before 1985/86 and averaged 8,191 between 1985/86 and 1996/97. Annual output averaged 81,695 tons and 33,356 tons for ten year period before 1985/86 and for the period 1985/86 to 1996/97.

Legumes such as cowpeas, pigeon peas and green gram are grown as sole crops or intercropped. They are susceptible to pests and diseases both in the field and in storage conditions. Area under legume production averaged 10,231 hectares per annum for ten year period before 1985/86 and averaged 8,693 hectares per annum for the period 1985/86 to 1996/97. Output averaged 1,881 tons per annum for ten years period before 1985/86 and 1,308 between 1985/86 and 1996/97.

Farm level data on land area cultivated for food and cash crops and quantities harvested were obtained from a sample of farmers for the period before tsetse intervention in 1985/86. In general, the total land area cultivated by each household was small as most crops were intercropped with two or more other crops on the same piece of land. The average size of land cultivated before tsetse intervention ranged from 0.3 acres for plantains to 2.0 acres for coconuts (Table 22 and Annex 8 Tables 1 and 3). Annual quantities of crops harvested are summarised in Table 22. For 44% and 26% of the sample farmers for example, the average quantities of cassava and sweet potatoes were 826 kg and 900 kg respectively.

Table 22. Land area cultivated and quantities of crops harvested and yields/acre in 1985/86 in Unguja, Zanzibar.

| Type of crop   | Land area cultivated * | Quantities harvested (kg) | Yield (kg/acre) | % of farmers responding (1,138) |
|----------------|------------------------|---------------------------|-----------------|---------------------------------|
| Cassava        | 1.4                    | 826                       | 597             | 43.5                            |
| Rice           | 1.1                    | 538                       | 492             | 24.7                            |
| Maize          | 0.9                    | 429                       | 477             | 9.0                             |
| Banana         | 1.0                    | 44                        | 44              | 31.0                            |
| Plantain       | 0.3                    | 13                        | 44              | 1.3                             |
| Sweet potatoes | 1.0                    | 899                       | 885             | 26.1                            |
| Yams           | 0.8                    | 420                       | 545             | 5.5                             |
| Cloves         | 1.3                    | 224                       | 170             | 4.0                             |
| Coconut        | 2.0                    | 1,134                     | 580             | 15.5                            |
| Tania          | 1.0                    | 365                       | 370             | 5.0                             |
| Vegetables     | 0.5                    | 134                       | 260             | 4.1                             |

Source: Averages and percentages are computed from Ministry of Agriculture statistics, Zanzibar.



To estimate the productivity of crops, yields obtained per acre were calculated from the quantities harvested from areas cultivated and are also summarised in Table 22. Crop yields before tsetse intervention were generally low, averaging about 0.6 metric tonnes per hectare for cassava, 0.9 metric tonnes for sweet potatoes and 0.5 metric tonnes for rice, maize and yams. These yields are significantly lower than the yields estimated from aggregate level data (see Table 21) and could be due to the inability of farmers to accurately estimate quantities of crop harvested since no records were being kept.

### 3.2.3. Exports and imports of livestock and agricultural products

Agricultural exports of Zanzibar comprise mainly of crop products. The main export crops have been the traditional crops such as cloves and copra. Following trade liberalization policy in the mid 1980s, agricultural exports have been diversified to include non-traditional crops such as chillies, citrus fruits, mangoes and spices such as ginger, turmeric, black pepper and cinnamon. Except for exportation of hides and skins to mainland Tanzania (Table 23), Zanzibar is a net importer of livestock products. Zanzibar imports various livestock products from Tanzania and abroad. Main livestock products imported into Zanzibar are live animals, meat, and milk and milk products. However, information on these imports is very scanty, probably due to changes in the ministry/department with mandate to keep such data. In the past, all trade statistics used to pass through the Ministry of Trade, Marketing and Industry. Following trade liberalization policy, most export and import transactions are handled by the customs department.

The problem of availability of data on livestock trade is compounded by the fact that statistical abstracts prepared by the Ministry of Statistics of the Ministry of Planning and Investment lump livestock products such as meat and milk together with other food products into one commodity class "food". Thus, the discussion on imports of live animals and milk and milk products is based on scanty information obtained from the Department of Livestock, Ministry of Agriculture and Natural Resources, and the Ministry of Trade, Marketing and Industry.

Table 23. Value of hides and skins exported to Mainland Tanzania 1994-1999

| Year | Value in (1,000TShs) | Value in US\$ |
|------|----------------------|---------------|
| 1994 | 6,270                | 12,058        |
| 1995 | 7,950                | 12,885        |
| 1996 | 8,400                | 13,816        |
| 1997 | 5,400                | 8,852         |
| 1998 | 5,265                | 8,100         |
| 1999 | 2,950                | 3,686         |

Source: Ministry of Trade, Marketing and Industry.

Table 24 presents the number of slaughter cattle imported from Mainland Tanzania and total cattle slaughtered in Zanzibar for the period before tsetse intervention in 1985/86 and for the period prior to final eradication in 1997. There is a general declining trend in the number of slaughter cattle imported from Mainland Tanzania. On average, Zanzibar

imported more slaughter cattle during the pre-tsetse control period (1978-1985) than during the tsetse control period (1986-1995). Imported slaughter cattle during the tsetse control period contributed about 34% of the total cattle slaughtered compared 71% of the cattle slaughtered in Zanzibar during the pre-tsetse control period (Table 24), suggesting an increase in slaughter cattle obtained from the domestic herd during the tsetse control periods. Despite the absence of slaughter cattle data for the post-tsetse control and eradication period (after 1997) one would expect more slaughter cattle from the domestic herd and eventually achieve the government policy objective of reducing dependency on slaughter animals from mainland Tanzania.

Table 24. Slaughter cattle imported from Mainland Tanzania, 1978-1995.

| Year            | Cattle from mainland | Total cattle slaughtered | Imported cattle as % of total cattle slaughtered |
|-----------------|----------------------|--------------------------|--------------------------------------------------|
| 1978            | 7,722                | 8,707                    | 88.7%                                            |
| 1979            | 4,780                | 7,624                    | 62.7%                                            |
| 1980            | 5,608                | 7,793                    | 71.9%                                            |
| 1981            | 4,809                | 6,741                    | 71.3%                                            |
| 1982            | 3,632                | 5,968                    | 60.8%                                            |
| 1983            | 4,514                | 6,677                    | 67.6%                                            |
| 1984            | 8,132                | 9,781                    | 83.1%                                            |
| 1985            | 4,266                | 7,531                    | 56.6%                                            |
| 1986            | 3,611                | 6,979                    | 51.7%                                            |
| 1987            | 530                  | 5,186                    | 10.2%                                            |
| 1988            | 440                  | 5,828                    | 7.5%                                             |
| 1989            | 953                  | 4,275                    | 22.3%                                            |
| 1990            | 598                  | 4,998                    | 11.9%                                            |
| 1991            | 1,168                | 5,433                    | 21.5%                                            |
| 1992            | 3,429                | 7,250                    | 47.3%                                            |
| 1993            | 4,557                | 8,331                    | 54.7%                                            |
| 1994            | 4,028                | 8,560                    | 47.1%                                            |
| 1995            | 2,729                | 8,385                    | 32.5%                                            |
| Average 1978-85 | 5,433                | 7,603                    | 71.5%                                            |
| Average 1986-95 | 2,204                | 6,523                    | 33.8%                                            |

Source: Department of Livestock, Ministry of Agriculture, Livestock and Natural Resources (MALNR), various issues.

Apart from beef production, the government of Zanzibar has the objective of achieving self-sufficiency in the production of milk and milk products. Self-sufficiency in milk and milk products is yet to be achieved despite recent increases in domestic milk production (Survey results show that milk production in Zanzibar has increased by 167% between pre-tsetse control/eradication (1985/86) and post-tsetse eradication in 1999. Available data indicate that Zanzibar is still importing milk and milk products to bridge the gap between domestic milk production and demand (Table 25).

Table 25 Value of imported milk and milk products 1992-1998

| Year | Value of milk (1,000 TShs) | Value in US\$ |
|------|----------------------------|---------------|
| 1992 | 16,633                     | 55,443        |
| 1993 | 16,633                     | 41,376        |
| 1994 | 98,555                     | 189,529       |
| 1995 | 103,959                    | 168,491       |
| 1996 | 135,383                    | 222,669       |
| 1997 | 267,946                    | 439,256       |

Source: Ministry of Trade, Marketing and Industry

### 3.3. Livestock and agriculture development in Unguja, post-tsetse eradication, 1999.

This section examines the current (1999) status of livestock and agriculture development in Unguja taking into account the key parameters that show changes in livestock productivity and performance. It also examines how these changes are related to the tsetse eradication intervention.

#### 3.3.1. Livestock production

##### 3.3.1.1. Livestock production systems

According to the recent description of the livestock production systems provided in the recent Agriculture Sector Review (1999), no major change appears to have occurred in the production systems practised before the tsetse intervention in 1985/86. The dominant livestock production system in Unguja is still the extensive system as indicated by 86% of the sample farmers (Table 26). Under this system, ruminant livestock still depend on low quality indigenous pastures and post-harvest crop residues left in the fields. Poultry rely on grass, insects, grains and kitchen leftovers under this system. About 14% of the sample farmers raise livestock under more intensive systems with more of them found in West and South Districts. Those who practise the semi-intensive system feed a variety of crop by-products and crop residues such as maize stovers, rice husks, bean and groundnut haulms, cassava and banana peels. Livestock under the intensive system are fed improved fodder, crop residues, concentrates and mineral supplements under a zero-grazing system.

Table 26. Cattle production systems practised in Unguja, Zanzibar, 1999.

| % farmers practising this feeding system: | District        |                |                 |               |              | All districts (n=1,138) |
|-------------------------------------------|-----------------|----------------|-----------------|---------------|--------------|-------------------------|
|                                           | Central (n=392) | North-A (n=65) | North-B (n=255) | South (n=186) | West (n=240) |                         |
| Extensive free range                      | 92.3            | 98.5           | 87.5            | 74.7          | 75.4         | 85.7                    |
| Intensive (zero-grazing)                  | 5.1             | 0.0            | 2.4             | 0.0           | 14.6         | 7.4                     |
| Semi-intensive                            | 1.8             | 0.0            | 5.5             | 16.1          | 7.5          | 6.2                     |

Source: Economic Assessment of Livestock Development on Zanzibar Survey, 1999.

### 3.3.1.2. Livestock species raised

Currently, livestock producers in Zanzibar raise cattle, goats, sheep, chickens, ducks, Guinea fowls, donkeys, rabbits and pigs. As was the case before tsetse intervention in 1985/86, cattle, goats and chickens are the most important species in terms of numbers and the proportion of farms raising them.

#### 3.3.1.2.1. Cattle

In the recent survey, 77% of the sample farmers reported raising indigenous cattle, with proportions varying from just 20% in North-A to 95% in Central and South Districts (Table 27). Farms with crossbred cattle make up 18% of the sample, with proportions ranging from 1% in North-A District to 31% in West District. In 1993 the proportion of farms raising cattle was estimated at about 50%. When compared to the current estimate, it can be said that more farmers have become involved in cattle production.

The average number of cattle per farm is estimated at 2.28 ( $\pm 4.36$  sd) indigenous cattle and 0.59 ( $\pm 2.51$  sd) crossbred cattle (Table 29). Farms in North-B District have more indigenous cattle (2.6 cattle per farm) compared to farms in South District (1.9 cattle per farm) even though the proportion of farms with cattle is greater in the South than in the North. On average, farms in West and Central Districts have three to four times the number of crossbred cattle in North-B and South Districts.

Table 27. Proportion (%) of farms with livestock in Unguja, 1999.

| Livestock species: | Central<br>(n=392) | North-A<br>(n=65) | North-B<br>(n=255) | South<br>(n=186) | West<br>(n=240) | All Districts<br>(n=1,138) |
|--------------------|--------------------|-------------------|--------------------|------------------|-----------------|----------------------------|
| Indigenous cattle  | 94.6               | 19.9              | 35.0               | 95.2             | 89.2            | 77.2                       |
| Crossbred cattle   | 21.9               | 1.1               | 5.0                | 16.7             | 31.2            | 18.1                       |
| Sheep and goats    | 14.3               | 1.6               | 7.9                | 13.4             | 19.6            | 13.1                       |
| Local poultry      | 55.1               | 9.1               | 24.6               | 48.9             | 69.2            | 47.6                       |
| Improved poultry   | 3.8                | 2.2               | 0.4                | 0.5              | 2.5             | 2.1                        |
| Donkeys            | 2.8                | 0.0               | 0.8                | 0.0              | 3.7             | 1.9                        |
| Rabbits            | 2.3                | 0.0               | 0.0                | 0.0              | 1.3             | 1.1                        |

Source: Economic Assessment of Livestock Development on Zanzibar Survey, 1999.

Given the current number of 2.28 cattle per farm and assuming that there are 26,500 livestock farms in Unguja (MALNR, 1998), the 1999 cattle population is estimated at 60,420 cattle. This compares higher than the 57,888 cattle projected for 1999 using an inter-census growth rate of 4%. With an estimated number of 0.59 crossbred cattle per farm, and assuming that 18% of the 26,500 livestock farms keep improved cattle, the total number of improved cattle in 1999 is estimated at 2,814 cattle. According to the 1993 livestock census, exotic and crossbred cattle made up 5.7% (2,605 cattle) of the 45,750 cattle available in Unguja. Assuming an annual growth rate of 4% (estimated from the inter-census populations), the number of improved cattle would be estimated at 3,296 in 1999, which is about 15% greater than the estimate from the survey.

### 3.3.1.2.1.1. Cattle herd structure

Presently, the cattle herd structure consists of 41% cows, 22% calves, 15% heifers, 9% bulls while steers and oxen account for the remaining 13% (Table 28). Compared to the herd structure in 1993, there appears to be no major change in the proportion of cows. Since the 1993 census did not provide separate classes for mature males, it may well be assumed that bulls included steers and oxen. If that is the case, then there has been a significant change in the proportion of mature males between the two periods. There has also been a decline in the proportion of calves and heifers. As well, the calf/cow ratio has declined from 0.59 in 1993 to 0.53 in 1999.

Table 28. Cattle herd structure by age and sex category in Unguja, Zanzibar, 1999.

| Age and sex category | Livestock census,<br>1993<br>(% of herd size) | Economic assessment of livestock<br>development survey, 1999 |                        |
|----------------------|-----------------------------------------------|--------------------------------------------------------------|------------------------|
|                      |                                               | Number of cattle per<br>category                             | % of average herd size |
| Cows                 | 42.0                                          | 0.94                                                         | 41.23                  |
| Calves               | 25.0                                          | 0.50                                                         | 21.93                  |
| Heifers              | 19.0                                          | 0.35                                                         | 15.40                  |
| Bulls                | 14.0*                                         | 0.21                                                         | 9.21                   |
| Steers               |                                               | 0.17                                                         | 7.46                   |
| Oxen                 |                                               | 0.11                                                         | 4.82                   |
| Total                | 100.0                                         | 2.28                                                         | 100.0                  |

\* Assumed to include steers and oxen.

Source: Economic Assessment of Livestock Development on Zanzibar Survey, 1999.

### 3.3.1.2.2. Sheep and goats

The proportion of farms with goats is estimated at 13%, which is close to 11% estimated during the 1993 livestock census (RGZ, Agricultural Sector Review, 1999). Most of the farms with goats are in West (20%), Central (14%) and South (13%) Districts (Table 27). The average number of goats and sheep per farm is 0.80 ( $\pm 3.69$  sd) with farms in North-A District having fewer numbers (0.51) than farms in North-B District (1.13). The estimated number of 0.8 would give a total population of 21,200 sheep and goats.

### 3.3.1.2.3. Chickens

About 48% of the sample farmers raise indigenous chickens while 2% raise improved chickens (Table 27). Each farm has an average of 9 ( $\pm 12$  sd) and 7 ( $\pm 198$  sd) indigenous and improved chickens respectively. The number of improved chickens vary significantly among the farms because of the existence of a few large-scale commercial poultry producers. Based on these estimates, the number of chickens in Unguja are estimated at 435,130 chickens.

### 3.3.1.2.4. Donkeys and rabbits

Only 2% of the sample farmers reported having donkeys and 1% having rabbits.

Table 29. Average herd /flock sizes for cattle, chickens, sheep and goats in Unguja, 1999.

| District | Average number of animals per farm |                  |                 |                     |                   |
|----------|------------------------------------|------------------|-----------------|---------------------|-------------------|
|          | Indigenous cattle                  | Crossbred cattle | Goats and sheep | Indigenous chickens | Improved chickens |
| Central  | 2.29 (6.54)*                       | 0.96 (3.51)      | 0.75 (3.65)     | 8.91 (11.82)        | 8.87 (206.24)     |
| North-A  | 2.38 (3.07)                        | 0.0 (0.0)        | 0.51 (4.77)     | 9.18 (9.74)         | 7.69 (2.00)       |
| North-B  | 2.64 (4.57)                        | 0.26 (3.34)      | 1.13 (4.30)     | 10.95 (12.07)       | 13.03 (349.90)    |
| South    | 1.91 (4.09)                        | 0.34 (1.30)      | 0.68 (3.11)     | 5.61 (7.93)         | 0.67 (45.86)      |
| West     | 2.16 (3.53)                        | 1.38 (4.38)      | 0.92 (2.61)     | 11.75 (19.75)       | 5.42 (190.86)     |
| Average  | 2.28 (4.36)                        | 0.59 (2.51)      | 0.80 (3.69)     | 9.28 (12.26)        | 7.14 (198.20)     |

Source: Economic Assessment of Livestock Development on Zanzibar Survey, 1999.

\* Standard deviations in parentheses.

### 3.3.1.3. Dairy production

Currently, the dairy sub-sector in Unguja is still largely based on indigenous cattle producing about 65% of total production while the remaining 35% comes from improved cattle breeds raised under more intensive conditions (RGZ, Agricultural Sector Review, 1999). This represents a major change given that in 1986 indigenous cattle were estimated to produce about 90% of the total domestic milk in Unguja.

#### 3.3.1.3.1. Dairy production with indigenous cattle

Recent estimates by the Zanzibar Commission for Agriculture and Livestock (1998) indicate that milk yield by the local zebus raised under the extensive system ranges between 1.5 and 2.5 liters/cow/day. Total annual milk production per cow varies from 200 to 400 liters per lactation with a lactation length ranging from 150 to 180 days and a calving interval of 24 to 26 months. According to the recent survey, 58% of the sample farmers are currently milking indigenous cattle and produce an average of 2.4 liters/cow/day with a standard deviation of 2.5 liters (Table 30).

When compared with estimates provided for the period 1985/86, the current estimates indicate that major changes have, in fact, occurred in the performance of the traditional dairy sector in Unguja. First, the relative proportion of farms milking indigenous cattle increased from 15% to 58% (Table 30), suggesting that over time, more farmers have become involved in traditional dairy production. Secondly, milk production within this sector has also increased, from 1.0 liters/farm to 2.4 liters/farm, an increase equivalent to 167%. This is a reflection of two things. One, whereas other factors may have contributed, the absence of tsetse and trypanosomosis is largely responsible. Before the start of control in 1985/86, an estimated 10.2% of the farms were affected by trypanosomosis with 4.3% of them losing an average of 24% of their cattle and lactating cows losing 56% of their milk. The other fact is an increasing proportion of farms (16%) now having access to new

grazing land (released from tsetse eradication) and an increasing proportion of farms (13%) now feeding crop residues and by-products to cattle.

Table 30. Milk production within the traditional sector in Unguja, Zanzibar, 1999

| District          | % of farms producing milk           |                                | Quantity of milk produced (liters/farm) |           |                             |
|-------------------|-------------------------------------|--------------------------------|-----------------------------------------|-----------|-----------------------------|
|                   | Before tsetse intervention, 1985/86 | After tsetse eradication, 1999 | Pre-tsetse eradication, 1985/86         |           | % change in milk production |
| Central (n=392)   | 14.3                                | 50.8                           | 0.8 (5.4)*                              | 2.5 (3.0) | 213.0                       |
| North-A (n=65)    | 10.8                                | 65.5                           | 0.5 (4.2)                               | 1.9 (1.5) | 460.0                       |
| North-B (n=255)   | 24.7                                | 61.1                           | 1.5 (4.7)                               | 2.8 (2.6) | 26.7                        |
| South (n=186)     | 7.0                                 | 56.7                           | 0.2 (3.6)                               | 2.9 (3.2) | 1350.0                      |
| West (n=240)      | 16.3                                | 64.5                           | 1.7 (8.9)                               | 2.0 (2.1) | 17.6                        |
| Total (n=1,138)   | 14.6                                | 58.2                           | 1.0 (5.4)                               | 2.4 (2.5) | 166.7                       |
| Number of farmers | 166                                 | 662                            |                                         |           | 298.8                       |

Source: Economic Assessment of Livestock Development on Zanzibar Survey, 1999.

\* Standard deviations in parentheses

### 3.3.1.3.2. Dairy production with improved cattle

Recently, the Zanzibar Agricultural Sector Review (1999) estimated that there are about 2,077 smallholder dairy farmers who raise some 6,000 improved cattle under semi-intensive and intensive (zero-grazing) production systems. Taking into consideration the estimate of 2,605 improved cattle from the 1993 livestock census, the current estimate represents a more than two fold increase in the number of improved cattle in Unguja. Based on research results obtained at the State farms in Bambi and Kizimbani on improved dairy cattle, the Commission for Agriculture and Livestock (1998) estimates that crossbred dairy cattle provide an average of 7 liters/cow/day with a potential of 14 liters whereas for exotic dairy cattle, daily production averages 12 liters with a potential of 27 liters. The lactation length for crossbred cattle is estimated at between 280 and 300 days while the calving rate averages 73%. Calf and cow mortality are estimated at 19.6% and 8.6% respectively (Table 31). Compared to the period before tsetse intervention, the calving rate has decreased by about 6%. Calf mortality has also declined by about half, suggesting an improvement in performance due to reduced disease incidence. While the decline in calving rate could have been due to a drop in the management standards on state farms, the general reduction in the incidence of disease apparent with the control of trypanosomosis could have accounted for the improvement in calf mortality rate.

Table 31. Calving and mortality rates for dairy cattle at the Bambi Research Station, 1986 - 1992.

| Year               | Calving rate (%) | Mortality rate (%) |        |
|--------------------|------------------|--------------------|--------|
|                    |                  | Cows               | Calves |
| 1986               | 69               | 7.2                | 15.0   |
| 1987               | 73               | 7.3                | 17.0   |
| 1988               | 77               | 6.7                | 35.9   |
| 1989               | 67               | 14.5               | 31.3   |
| 1990               | 72               | 8.5                | 15.0   |
| 1991               | 75               | 8.0                | 10.0   |
| 1992               | 76               | 8.3                | 13.0   |
| Average, 1986-1992 | 73               | 8.6                | 19.6   |
| Average, 1977-1985 | 78.5             | 4.5                | 26.1   |

Source: MALNR, Department of Livestock, 1995.

### 3.3.2. CROP PRODUCTION

#### 3.3.2.1. Types of crops produced and their importance

In spite of slight differences across the five districts in the ranking of the major food crops, most farmers interviewed reported cassava, banana/plantain, sweet potatoes, rice, yams, maize and vegetables as important food crops (in declining order of importance) (Table 31). Important cash crops (in declining order of importance) as considered by the farmers are cassava, banana/plantain, sweet potatoes, coconut, vegetables, yams, cloves, maize, fruits and rice (Table 32). Almost all the food crops considered as important by the farmers are important sources of cash income. Cassava and banana/plantain appear to be the most important crops not only as food crops but also as the major cash crops in the household economy of Zanzibar. Cloves which is traditionally the major export and cash crop of Zanzibar is one of the cash crops considered important by farmers but ranked below cassava, banana, sweet potatoes, coconut, vegetables and yams (Table 33).

Table 32. Food crops considered as important by farmers.

| Farmers who consider these as important (%) | District        |                |                 |               |              | All districts (n=1,138) |
|---------------------------------------------|-----------------|----------------|-----------------|---------------|--------------|-------------------------|
|                                             | Central (n=392) | North-A (n=65) | North-B (n=255) | South (n=186) | West (n=240) |                         |
| Cassava                                     | 90.8            | 95.4           | 97.3            | 79.0          | 90.8         | 90.7                    |
| Banana/plantain                             | 80.6            | 80.0           | 64.3            | 57.0          | 72.1         | 70.8                    |
| Sweet potatoes                              | 58.2            | 66.2           | 49              | 18.3          | 40.4         | 46.4                    |
| Rice                                        | 24.7            | 73.9           | 77.7            | 6.5           | 43.8         | 45.3                    |
| Yams                                        | 25.0            | 1.5            | 4.3             | 45.7          | 12.1         | 17.7                    |
| Maize                                       | 18.6            | 10.8           | 5.9             | 13.4          | 9.2          | 11.6                    |
| Vegetables                                  | 5.1             | 1.5            | 0.8             | 15.0          | 3.8          | 5.2                     |
| Other food crops                            | 11.2            | 4.6            | 4.7             | 10.2          | 3.8          | 6.9                     |

Source: Economic Assessment of Livestock Development on Zanzibar Survey, 1999.



Table 33. Cash crops considered as important by farmers.

| Farmers who consider these as important (%) | District        |                |                 |               |              | All districts (n=1,138) |
|---------------------------------------------|-----------------|----------------|-----------------|---------------|--------------|-------------------------|
|                                             | Central (n=392) | North-A (n=65) | North-B (n=255) | South (n=186) | West (n=240) |                         |
| Cassava                                     | 33.4            | 33.9           | 34.9            | 22            | 50.8         | 35.0                    |
| Banana/plantain                             | 30.8            | 26.2           | 22.8            | 19.4          | 37.1         | 27.3                    |
| Sweet potatoes                              | 24.7            | 41.5           | 34.1            | 4.3           | 19.6         | 24.8                    |
| Coconut                                     | 15.3            | 9.2            | 38              | 11.3          | 29.6         | 20.7                    |
| Vegetables                                  | 36.7            | 15.4           | 3.5             | 19.4          | 4.6          | 15.9                    |
| Yams                                        | 14.8            | 1.5            | 3.9             | 20.4          | 10.4         | 10.2                    |
| Cloves                                      | 1.5             | 4.6            | 16.1            | 0             | 8.7          | 6.2                     |
| Maize                                       | 9.4             | 6.2            | 1.6             | 3.8           | 4.2          | 5.0                     |
| Fruits                                      | 13.8            | 0              | 1.6             | 6.4           | 1.3          | 4.6                     |
| Rice                                        | 1.8             | 4.6            | 1.6             | 0.5           | 4.6          | 2.6                     |

Source: Economic Assessment of Livestock Development on Zanzibar Survey, 1999.

### 3.3.2.2. Acreage cultivated

Land area cultivated in 1999 varied from 0.7 acres for yams and vegetables to 1.9 acres for coconuts (Table 34) with West District having the largest amount of land (2.8 acres) devoted to coconuts (Annex 8 Tables 4 to 6). The land areas cultivated per household before tsetse intervention in 1985/86 and after tsetse intervention in 1999 do not vary significantly between most crops. However, relatively more land in 1999 is allocated to the crops given top priority as cash crops and food crops. Comparing the areas cultivated in 1985/86 and in 1999, land areas cultivated for coconut, cloves, rice and yams declined, with area under cloves declining more than the other crops (Table 34). Land areas cultivated for cassava, sweet potatoes, tania (cocoyams) and maize increased slightly or remained the same while land areas cultivated for vegetables and plantain/banana increased substantially (Table 34).

Table 34. Changes in land area cultivated before and after tsetse intervention in Unguja, Zanzibar.

| Type of crop   | Acreage cultivated (acres)            |                                   | % change |
|----------------|---------------------------------------|-----------------------------------|----------|
|                | Before tsetse intervention in 1985/86 | After tsetse intervention in 1999 |          |
| Coconut        | 2.0                                   | 1.9                               | 5.0      |
| Cassava        | 1.4                                   | 1.4                               | 0.0      |
| Cloves         | 1.3                                   | 1.0                               | -23.0    |
| Rice           | 1.1                                   | 1.0                               | -9.0     |
| Banana         | 1.0                                   | 1.0                               | 0.0      |
| Sweet potatoes | 1.0                                   | 1.1                               | 10.0     |
| Tania          | 1.0                                   | 1.1                               | 10.0     |
| Maize          | 0.9                                   | 0.9                               | 0.0      |
| Yams           | 0.8                                   | 0.7                               | -12.5    |
| Vegetables     | 0.5                                   | 0.7                               | 40.0     |
| Plantain       | 0.3                                   | 1.1                               | 267.0    |

Source: Economic Assessment of Livestock Development on Zanzibar Survey, 1999.

Although the increase in land areas cultivated for some of the crops may be attributed to factors other than influence of tsetse eradication, tsetse eradication appears to have increased access to land for crop production. A large proportion (70%) of the sample farmers who acquired new land after tsetse eradication did so in tsetse cleared areas. The Central district has the largest proportion of farmers who grow crops on land acquired in tsetse cleared areas. Moreover, some farmers (46% of total sample) intend to acquire new crop land in tsetse cleared areas in future. Again, most of the farmers who intend to acquire crop land in tsetse cleared areas are in the Central District.

Comparison of national level data for the period before and after tsetse intervention is not possible because aggregate (national level) time series data on land areas cultivated for major crops in Unguja-Zanzibar were not available for the period after tsetse eradication. National level data were only available for the period before tsetse intervention in 1985/86 and tsetse control/eradication period 1986/87-1996/97 (Annex 7 Tables 2 and 4).

### 3.3.2.3. Quantities of crops harvested and crop yields

Tables 35 and 36 provide information on quantities of crops harvested and crop yields obtained before tsetse intervention in 1985/86 and after tsetse eradication in 1999 respectively. Except for banana, plantain, yams, cloves and vegetables, quantities harvested during the post-tsetse eradication period of the other crops declined from their pre-tsetse eradication levels. In terms of yields, post-tsetse eradication yields for cassava, rice, maize, plantain, sweet potatoes and tania declined from their pre-tsetse eradication levels.

Table 35. Changes in food and cash crop quantities harvested before and after tsetse intervention in Unguja, Zanzibar.

| Type of crop   | Quantities harvested (Kg)             |                                   | % change |
|----------------|---------------------------------------|-----------------------------------|----------|
|                | Before tsetse intervention in 1985/86 | After tsetse intervention in 1999 |          |
| Cassava        | 826                                   | 790                               | -4.4     |
| Rice           | 538                                   | 443                               | -17.6    |
| Maize          | 429                                   | 392                               | -8.6     |
| Banana*        | 44                                    | 52                                | 18.2     |
| Plantain*      | 13                                    | 21                                | 61.6     |
| Sweet potatoes | 899                                   | 837                               | -6.9     |
| Yams           | 420                                   | 471                               | 12.1     |
| Cloves         | 224                                   | 249                               | 11.2     |
| Coconut        | 1,134                                 | 1,124                             | -1.0     |
| Tania          | 365                                   | 355                               | -2.7     |
| Vegetables     | 134                                   | 197                               | 47.0     |

\* Bunches

Source: 1999 survey results.

Table 36. Changes in food and cash crop yields obtained before and after tsetse intervention in Unguja, Zanzibar.

| Type of crop   | Crop yields (Kg/acre)                 |                                   | % change |
|----------------|---------------------------------------|-----------------------------------|----------|
|                | Before tsetse intervention in 1985/86 | After tsetse intervention in 1999 |          |
| Cassava        | 597                                   | 559                               | -6.4     |
| Rice           | 492                                   | 443                               | -10.0    |
| Maize          | 477                                   | 457                               | -4.2     |
| Banana*        | 44                                    | 53                                | 20.5     |
| Plantain*      | 44                                    | 19                                | -56.8    |
| Sweet potatoes | 885                                   | 756                               | -14.6    |
| Yams           | 545                                   | 687                               | 26.0     |
| Cloves         | 170                                   | 252                               | 48.2     |
| Coconut        | 580                                   | 608                               | 4.8      |
| Tania          | 370                                   | 324                               | -12.4    |
| Vegetables     | 260                                   | 285                               | 9.6      |

\* Bunches

Source: 1999 survey results.

### 3.3.3. Implications for agricultural development and marketing

A closer look at the farm level data on livestock and crop production during the pre- and post-tsetse control/eradication periods reveals a number of important changes that have occurred in the light of tsetse eradication in Zanzibar. These changes have important implications for the future development of agricultural systems and the marketing of agricultural products in Zanzibar.

With regard to the livestock sub-sector, when livestock farms and the number of animals per farm in 1999 are compared with those reported before the tsetse intervention in 1985/86, a number of important changes can be noted. First, the relative proportion of farms raising indigenous cattle, chickens, goats and sheep has increased by about two times between 1985/86 and 1999. The change is even more pronounced for farms with improved cattle increasing six fold (Table 37). The relative increase in farms raising livestock could be attributed to a number of reasons. The first is the increased desire by farmers to diversify their agricultural activities. During the interviews, farmers were unanimous about having animals as a buffer against crop failure. The second reason is the increase due to the general population increase. With an annual population increase of 2.8% and with limited employment opportunities outside agriculture, more people have had no choice but to seek employment opportunities in animal agriculture. The third reason is that with the eradication of tsetse and trypanosomosis in Unguja, farmers have perceived livestock production to be less risky because of the low disease challenge.

Secondly, the number of animals per farm in 1999 has also increased, *al beit* at different rates. The number of indigenous cattle increased by about half from 1.53 to 2.28 cattle per farm (Table 37). The number of crossbred cattle per farm has increased seven fold between 1985/86 and 1999. For sheep and goats, there has been an 86% increase in the number per farm. The number of indigenous chickens more than doubled while the number

of improved chickens per farm increased by 92%. The significant increase in the number of animals per farm could among other factors, be attributed to the relatively low mortality rate experienced in the absence of trypanosomosis in 1999 compared to 1985/86 when the disease had not been eradicated. However, disease still remains a major constraint to livestock production in Unguja because of the prevalence of other diseases. Most farmers interviewed reported East Coast Fever (88%), Lumpy Skin Disease (44%) and Helminthiasis (42%) as important diseases constraining livestock production (Table 38). Another reason for the increase in the number of animals, particularly for improved breeds is the increasing desire by farmers to intensify production.

Table 37. Average herd/flock sizes for cattle, chickens, sheep and goats in Unguja, pre- and post-tsetse intervention.

| Livestock species:  | Pre-tsetse control, 1985/86 |                 | Post-tsetse eradication, 1999 |                 | % change in |                 |
|---------------------|-----------------------------|-----------------|-------------------------------|-----------------|-------------|-----------------|
|                     | % of farms                  | Herd/flock size | % of farms                    | Herd/flock size | % of farms  | Herd/flock size |
| Indigenous cattle   | 31.5                        | 1.5 (5.26)*     | 77.2                          | 2.3 (4.36)      | 145.1       | 49.0            |
| Crossbred cattle    | 2.4                         | 0.07 (1.52)     | 18.1                          | 0.6 (3.13)      | 654.2       | 742.8           |
| Sheep and goats     | 5.6                         | 0.4 (4.80)      | 13.1                          | 0.8 (3.69)      | 134.0       | 86.1            |
| Indigenous chickens | 20.6                        | 3.3 (17.59)     | 47.6                          | 9.3 (12.26)     | 131.1       | 181.2           |
| Improved poultry    | 1.1                         | 3.7 (n.a.)      | 2.1                           | 7.1 (198.20)    | 91.0        | 92.4            |

n.a. not available

\* Standard deviations in parentheses

Table 38. Farmers' ranking of the importance of other animal diseases.

| Diseases               | District        |                |                 |               |              | Total (n=1,138) |
|------------------------|-----------------|----------------|-----------------|---------------|--------------|-----------------|
|                        | Central (n=392) | North-A (n=65) | North-B (n=255) | South (n=186) | West (n=240) |                 |
| East Coast Fever       | 88.5            | 90.8           | 91.8            | 90.8          | 79.2         | 88.2            |
| Lumpy Skin Disease     | 53.1            | 32.3           | 53.3            | 12.4          | 69.6         | 44.1            |
| Helminthiasis          | 29.3            | 58.5           | 53.3            | 29.6          | 40           | 42.1            |
| Foot and Mouth Disease | 15.8            | 6.2            | 10.9            | 0             | 26.3         | 14.8            |
| Heart Water            | 14              | 9.2            | 4.3             | 1.1           | 1.3          | 6.0             |
| Pneumonia              | 6.6             | 1.5            | 0.4             | 6.5           | 1.3          | 3.3             |
| Other Diseases         | 5.1             | 63.1           | 26.2            | 0.5           | 27.5         | 24.5            |

In terms of crop production, a number of observations can be noted in the changes observed in crop yields obtained. First, whereas areas cultivated for crops such as cassava, sweet potatoes, tania (cocoyams), maize and plantain increased or remained the same after tsetse intervention, yields obtained for these crops declined. This suggests a decline in productivity of land used to produce these crops.

Second, areas cultivated for cloves, yams and coconuts declined after tsetse intervention but yields obtained increased, suggesting that productivity of these crops has improved after tsetse eradication. This is not surprising especially for cloves as there has been deliberate efforts by the government to revive cloves production in Zanzibar (Personal

communication with Ministry of Agriculture Officials). Cloves has for a long time been the major traditional cash and export crop in Zanzibar. Available aggregate (national level) time series data for the period 1975/76-1996/97 show a general declining trend in production of the crop (Annex 7 Tables 1 and 2). Reasons given for the declining trend in cloves production include poor management of clove trees caused by low returns obtained by farmers as a result of low prices received. Other reasons have been the climatic variations, diseases as well as the insecurity of the three-acre land tenure system for clove production. One of the measures taken by the government in recent years was to restructure the marketing system of the crop as well as provision of good drying facilities to improve quality (Personal communication with Ministry of Agriculture officials). High grade cloves fetches a higher price. The measures taken by the government may have been one of the contributing factors to the increase in cloves production from 1,073 tons in 1995/96 to 11,368 tons in 1996/97 (Annex 7 Table 3).

Third, yields obtained for banana and vegetables increased after tsetse eradication while the area under banana remained the same and that under vegetable production increased, implying increase in productivity (output/acres) in the case of bananas.

### **3.3.3.1. Intensification of livestock and crop production**

Indicators of intensification in livestock production include adoption of high yielding animal breeds accompanied by improved nutritional and health management practices. Intensification in crop production requires the adoption of high yielding crop varieties, use of inorganic and organic fertilizers and other inputs that can raise output per unit area. How well farmers adopt these practices clearly depends on the availability of opportunities and their willingness to take advantage of such opportunities. In Zanzibar, these opportunities include the eradication of major animal diseases such as trypanosomosis which has provided a more favorable environment for raising improved livestock species and has opened up new opportunities for a more optimal use of land resources through integration of crop and animal agriculture as well as the availability of improved animal breeds and crop varieties. The extent however, to which farmers capitalize on such opportunities depends on their level of awareness of the opportunities.

When farmers were asked about their knowledge of the availability of improved livestock breeds in Unguja, 31% reported that they were aware of the availability of crossbred cattle whereas only 6% were aware of exotic breeds. About 13% were aware of the availability of improved poultry breeds while less than 1% knew of improved sheep and goat breeds (Table 39). When information was sought on farmers' preferences for livestock breeds, 62% reported that they preferred improved breeds while 36% preferred local breeds (Table 40). Among the reasons given for preferring improved breeds were their high level of productivity (65%), their ability to mature early (2%) and the fact that they are a source of good genetic material (1%). The reasons given for local breeds include the fact that they are easy to manage (15%), are disease resistant (11%) and can easily be obtained (5%) at low cost.

Table 39. Farmer awareness of the availability of improved livestock species in Unguja, Zanzibar.

| Farmers who are aware of<br>The availability of improved<br>livestock species (%): | District           |                   |                    |                  |                 | All districts<br>(n=1,138) |
|------------------------------------------------------------------------------------|--------------------|-------------------|--------------------|------------------|-----------------|----------------------------|
|                                                                                    | Central<br>(n=392) | North-A<br>(n=65) | North-B<br>(n=255) | South<br>(n=186) | West<br>(n=240) |                            |
| Pure-bred cattle: Yes                                                              | 5.1                | 7.7               | 5.9                | 1.6              | 11.7            | 6.4                        |
| No                                                                                 | 85.0               | 55.4              | 36.1               | 91.9             | 15.4            | 56.8                       |
| Non-responses                                                                      | 9.9                | 36.9              | 58.0               | 6.5              | 72.9            | 36.9                       |
| Crossbred cattle: Yes                                                              | 38.8               | 27.7              | 33.3               | 25.3             | 30.0            | 31.0                       |
| No                                                                                 | 58.0               | 6.1               | 32.2               | 68.3             | 10.0            | 34.9                       |
| Non-responses                                                                      | 3.2                | 9.2               | 34.5               | 6.4              | 60.0            | 22.7                       |
| Improved sheep and goats:                                                          |                    |                   |                    |                  |                 |                            |
| Yes                                                                                | 0.0                | 0.0               | 0.4                | 0.0              | 0.0             | 0.4                        |
| No                                                                                 | 80.6               | 52.3              | 27.1               | 90.3             | 15.0            | 53.1                       |
| Non-responses                                                                      | 19.4               | 47.7              | 72.6               | 9.7              | 85.0            | 46.9                       |
| Improved poultry: Yes                                                              | 26.5               | 12.3              | 12.6               | 4.3              | 11.3            | 13.4                       |
| No                                                                                 | 63.8               | 56.9              | 26.7               | 86.0             | 15.0            | 49.7                       |
| Non-responses                                                                      | 9.7                | 69.2              | 60.8               | 9.7              | 73.7            | 44.6                       |

Source: Economic Assessment of Livestock Development on Zanzibar Survey, 1999.

Table 40. Farmers' preference for improved livestock breeds and reasons.

| Farmers who prefer (%):        | District           |                   |                    |                  |                 | All districts<br>(n=1,138) |
|--------------------------------|--------------------|-------------------|--------------------|------------------|-----------------|----------------------------|
|                                | Central<br>(n=392) | North-A<br>(n=65) | North-B<br>(n=255) | South<br>(n=186) | West<br>(n=240) |                            |
| Local breeds: Number           | 221                | 8                 | 67                 | 55               | 57              | 408                        |
| %                              | 56.5               | 12.3              | 26.3               | 29.6             | 23.7            | 35.8                       |
| Improved breeds: Number        | 150                | 57                | 186                | 129              | 183             | 705                        |
| %                              | 38.2               | 87.7              | 72.9               | 69.6             | 76.3            | 62.0                       |
| Non-responses (%)              | 5.3                | 0                 | 0.8                | 0.8              | 0               | 2.2                        |
| Reasons for preference<br>(%): |                    |                   |                    |                  |                 |                            |
| Local breeds:                  |                    |                   |                    |                  |                 |                            |
| Disease resistance             | 19.9               | 1.54              | 7.06               | 13               | 13.8            | 11.1                       |
| Easy to obtain                 | 3.2                | 4.62              | 0.39               | 14.5             | 1.3             | 4.8                        |
| Easy to manage                 | 40.9               | 6.15              | 19.22              | 8.9              | 1.3             | 15.3                       |
| Improved breeds:               |                    |                   |                    |                  |                 |                            |
| High productivity              | 28.5               | 87.69             | 72.16              | 66.6             | 70.8            | 65.2                       |
| Improved genetic material      | 1.1                | 0                 | 0                  | 1                | 0               | 1.1                        |
| Early maturity                 | 1.6                | 0                 | 0                  | 2.6              | 0               | 2.1                        |
| Others                         | 0                  | 0                 | 0.39               | 0                | 0.8             | 0.6                        |

Source: Economic Assessment of Livestock Development on Zanzibar Survey, 1999.

### 3.3.3.1.1. Adoption of improved livestock breeds and crop varieties

In spite of farmers' willingness to acquire improved livestock breeds and improved crop varieties in Unguja, the level of adoption remains very low. Farmers do not at the present time have easy access to these resources nor do they have a wide range of options from which to choose. Currently, only 20% of the sample farmers report that they acquire

crossbred cattle from neighbors or other farmers whereas the percentage of farmers acquiring exotic cattle is only 5% (Table 41). Central and West Districts dominate in the number of farmers acquiring improved cattle breeds. For poultry farmers, only 7% report that they acquire improved poultry breeds from private breeding companies. The most important limiting factor to increased adoption of improved livestock breeds according to 46% of the sample farmers is inadequate finances (Table 42).

Table 41. Sources of improved livestock species in Unguja, Zanzibar.

| % of farmers who acquire improved livestock from this source: | District        |                |                 |               |              | All districts (n=1,138) |
|---------------------------------------------------------------|-----------------|----------------|-----------------|---------------|--------------|-------------------------|
|                                                               | Central (n=392) | North-A (n=65) | North-B (n=255) | South (n=186) | West (n=240) |                         |
| Exotic cattle:                                                |                 |                |                 |               |              |                         |
| Neighbors and other farmers                                   | 3.8             | 3.1            | 1.2             | 3.8           | 10.4         | 4.5                     |
| Government farm                                               | 1.5             | 3.1            | 0.0             | 0.0           | 0.4          | 1.7                     |
| Livestock market                                              | 0.0             | 0.0            | 3.1             | 0.0           | 0.0          | 3.1                     |
| Crossbreed cattle:                                            |                 |                |                 |               |              |                         |
| Neighbors/other farmers                                       | 27.8            | 21.5           | 11.8            | 15.1          | 24.2         | 20.1                    |
| Gov't farm                                                    | 3.8             | 3.1            | 5.1             | 2.7           | 4.2          | 3.8                     |
| Livestock market                                              | 0.8             | 1.5            | 14.1            | 0.0           | 0.8          | 4.3                     |
| Improved sheep and goats*                                     | n.r.            | n.r.           | n.r.            | n.r.          | n.r.         | n.r.                    |
| Improved poultry:                                             |                 |                |                 |               |              |                         |
| Neighbors and other farmers                                   | 2.8             | 1.5            | 0.0             | 2.7           | 0.0          | 2.3                     |
| Government farm                                               | 7.1             | 0.0            | 0.0             | 1.6           | 0.0          | 4.4                     |
| Livestock market                                              | 15.8            | 9.2            | 3.9             | 0.0           | 0.4          | 7.3                     |

Source: Economic Assessment of Livestock Development on Zanzibar Survey, 1999.

\* No respondent.

Table 42. Important constraints to the acquisition of improved livestock breeds in Unguja, Zanzibar.

| Farmers who consider this as a constraint | District        |                |                 |               |              | Total (n=1,138) |
|-------------------------------------------|-----------------|----------------|-----------------|---------------|--------------|-----------------|
|                                           | Central (n=392) | North-A (n=65) | North-B (n=255) | South (n=186) | West (n=240) |                 |
| Inadequate finances                       | 33.4            | 87.7           | 51.8            | 43.4          | 43.7         | 46.0            |
| Unavailability                            | 4.6             | 1.5            | 3.1             | 0.5           | 1.7          | 2.3             |
| Other factors                             | 5.1             | 4.6            | 9.0             | 0.5           | 5.4          | 4.9             |

Source: Economic Assessment of Livestock Development on Zanzibar Survey, 1999.

For those farmers who are able to acquire improved livestock breeds, the average price paid for a crossbred cattle is Tshs 182,000 (US\$ 228) ( $\pm$  90,000 Tshs) ( $\pm$  112.5 US\$) with a minimum price of Tshs 90,000 (US\$ 112.5) and a maximum of Tshs 360,000 (450 US\$). For exotic cattle breeds the average price is Tshs 287,000 (359 US\$) ( $\pm$  Tshs 95,000) ( $\pm$  119 US\$) (Table 43). The average price for improved poultry is Tshs 528 (US\$ 0.7) ( $\pm$  Tshs 304) ( $\pm$  0.4 US\$).

Table 43. Average prices paid by farmers for improved livestock breeds in Unguja, Zanzibar

|                                    | District       |                |                |                |                | All districts  |        |
|------------------------------------|----------------|----------------|----------------|----------------|----------------|----------------|--------|
|                                    | Central        | North-A        | North-B        | South          | West           | Amount         | %      |
| <b>Pure-bred cattle:</b>           |                |                |                |                |                |                |        |
| Average price<br>(1,000 Tshs/head) | 380<br>(475)   | 250<br>(312.5) | 263<br>(328.7) | 124<br>(155)   | 418<br>(522.5) | 287<br>(358.7) |        |
| Standard deviation                 | 113<br>(141.3) | 87<br>(108.7)  | 48<br>(60)     | 55<br>(68.7)   | 174<br>(217.5) | 95<br>(118.7)  |        |
| Maximum                            | 500<br>(625)   | 350<br>(437.5) | 300<br>(375)   | 350<br>(437.5) | 500<br>(625)   | 400<br>(500)   |        |
| Minimum                            | 47<br>(58.7)   | 2<br>(2.5)     | 200<br>(250)   | 60<br>(75)     | 80<br>(100)    | 78<br>(97.5)   |        |
| Number of farmers                  | 19             | 3              | 4              | 5              | 26             | 57             | 5.01%  |
| <b>Crossbreed cattle:</b>          |                |                |                |                |                |                |        |
| Average price<br>(1,000 Tshs/head) | 190<br>(237.5) | 190<br>(237.5) | 243<br>(303.7) | 106<br>(132.5) | 181<br>(226.3) | 182<br>(227.5) |        |
| Standard deviation                 | 99<br>(123.7)  | 116<br>(145)   | 86<br>(107.5)  | 62<br>(77.5)   | 89<br>(111.2)  | 90<br>(112.5)  |        |
| Maximum                            | 400<br>(500)   | 500<br>(625)   | 450<br>(562.5) | 200<br>(250)   | 250<br>(312.5) | 360<br>(450)   |        |
| Minimum                            | 30<br>(37.5)   | 20<br>(25)     | 100<br>(125)   | 40<br>(50)     | 40<br>(50)     | 46<br>(57.5)   |        |
| Number of farmers                  | 121            | 12             | 59             | 34             | 70             | 296            | 26.01% |
| <b>Improved poultry:</b>           |                |                |                |                |                |                |        |
| Average price                      | 390<br>(0.5)   | 790<br>(1.0)   | 384<br>(0.5)   | 614<br>(0.8)   | 461<br>(0.6)   | 528<br>(0.7)   |        |
| Standard deviation                 | 260<br>(0.3)   | 690<br>(0.9)   | 168<br>(0.2)   | 234<br>(0.3)   | 165<br>(0.2)   | 304<br>(0.4)   |        |
| Maximum                            | 1,500<br>(1.9) | 2,000<br>(2.5) | 650<br>(0.8)   | 1,500<br>(1.9) | 600<br>(0.7)   | 1,250<br>(1.6) |        |
| Minimum                            | 40<br>(0.05)   | 350<br>(0.4)   | 45<br>(0.06)   | 350<br>(0.4)   | 40<br>(0.05)   | 165<br>(0.2)   |        |
| Number of farmers                  | 62             | 5              | 7              | 7              | 26             | 107            | 9.40%  |

Remarks. Numbers in parentheses are values in US\$ (1 US\$ = 800 TSHS)

Source: Economic Assessment of Livestock Development on Zanzibar Survey, 1999.

### 3.3.3.1. 2. Access to land resources

According to estimates provided by the National Land Use Plan of 1993, the amount of grazing land in Unguja increased by 30% from 2,140 hectares in 1982 to 3,215 hectares in 1993. With the introduction of tsetse control measures in 1985/86 and the eventual eradication of tsetse flies in 1997, more land became available for crop and livestock production, particularly in the previously infested forest areas of the Island especially around Jozani forest. The government has however declared this forest a protected area to conserve its rich wild flora and fauna. As indicated by the survey results, 23% of the farmers reported that they have farm land in areas cleared of tsetse flies. North-B, West and Central Districts have 30%, 26% and 24% of the farmers with land in areas cleared of tsetse flies respectively. Of the total sample, 16% reported that they have acquired new



farm land in tsetse free areas (Table 44). For those farmers who did not have land in tsetse cleared areas, 46% have plans to do so in the future.

Table 44. Access to land in tsetse cleared areas in Unguja, Zanzibar.

|                                                                     | District           |                   |                    |                  |                 | All districts<br>(n=1,138) |
|---------------------------------------------------------------------|--------------------|-------------------|--------------------|------------------|-----------------|----------------------------|
|                                                                     | Central<br>(n=392) | North-A<br>(n=65) | North-B<br>(n=255) | South<br>(n=186) | West<br>(n=240) |                            |
| Farmers having farm land in tsetse cleared areas after eradication  |                    |                   |                    |                  |                 |                            |
| Number                                                              | 94                 | 5                 | 76                 | 26               | 62              | 263                        |
| %                                                                   | 24.0               | 7.7               | 29.8               | 14.0             | 25.8            | 23.0                       |
| Farmers acquiring new land in tsetse cleared areas                  |                    |                   |                    |                  |                 |                            |
| Number                                                              | 86                 | 2                 | 38                 | 10               | 48              | 184                        |
| %                                                                   | 22.0               | 3.1               | 15.0               | 5.4              | 20.0            | 16.2                       |
| Farmers intending to acquire land in tsetse cleared areas in future |                    |                   |                    |                  |                 |                            |
| Number                                                              | 237                | 11                | 93                 | 80               | 103             | 524                        |
| %                                                                   | 60.4               | 17.0              | 36.5               | 43.0             | 43.0            | 46.0                       |

Source: Economic Assessment of Livestock Development on Zanzibar Survey, 1999.

### 3.3.3.1.3. Integration of crops and livestock

Not only has the land area available for crop and livestock production increased in 1999, the proportion of farmers using land to integrate crops and livestock has also increased relative to the period before tsetse intervention in 1985/86. This enables a more efficient use of land resources as crop residues and by-products are fed to livestock and as animal manure is in turn used to enrich the soil. Among the sample farmers, 13% are feeding crop by-products to livestock while 8% are feeding concentrates and 4% providing mineral supplements (Table 45) to their animals. West District has the largest number of farmers feeding crop by-products, concentrates and mineral supplements. Only 4% of the farmers are feeding improved fodder to cattle, with the proportion varying from less than 1% in South District to 9% in West District.

Rotational grazing as another form of crop-livestock integration is also gaining prominence in more intensive production systems in Unguja. This practice is common among 59% of the sample farmers who allow cattle to fertilize farm plots and among 51% who grow crops on plots fertilized by cattle (Table 46). The future potential of this practice is also promising according to the intentions of 29% of the sample farmers.

Table 45. Feed stuffs fed to livestock in Unguja, Zanzibar, 1999.

| % of farms using these feed stuffs | District           |                   |                    |                  |                 | All                    |
|------------------------------------|--------------------|-------------------|--------------------|------------------|-----------------|------------------------|
|                                    | Central<br>(n=392) | North-A<br>(n=65) | North-B<br>(n=255) | South<br>(n=186) | West<br>(n=240) | Districts<br>(n=1,138) |
| Improved fodder                    | 5.1                | 4.6               | 1.2                | 0.5              | 9.2             | 4.1                    |
| Crop by-products                   | 11.0               | 1.5               | 14.9               | 5.9              | 33.3            | 13.3                   |
| Concentrates                       | 4.1                | 0.0               | 2.7                | 0.0              | 18.3            | 8.4                    |
| Mineral supplements                | 2.3                | 0.0               | 2.0                | 0.0              | 8.3             | 4.2                    |
| Other                              | 0.8                | 0.0               | 1.2                | 0.0              | 0.0             | 1.0                    |

Source: Economic Assessment of Livestock Development on Zanzibar Survey, 1999.

Table 46. Use of animal manure for crop production.

|                                                              | District           |                   |                    |                  |                 | Total     |
|--------------------------------------------------------------|--------------------|-------------------|--------------------|------------------|-----------------|-----------|
|                                                              | Central<br>(n=392) | North-A<br>(n=65) | North-B<br>(n=255) | South<br>(n=186) | West<br>(n=240) | (n=1,138) |
| Farmers who allow animals to fertilize crop fields           |                    |                   |                    |                  |                 |           |
| Number                                                       | 312                | 46                | 110                | 120              | 81              | 669       |
| %                                                            | 79.6               | 70.8              | 43.1               | 64.5             | 33.7            | 58.8      |
| Number of years using animal manure for crop production      |                    |                   |                    |                  |                 |           |
| Std. De.                                                     | 6.1                | 2.8               | 6.4                | 7.3              | 6.2             | 5.8       |
|                                                              | 5.8                | 1.5               | 7.4                | 5.9              | 4.6             | 5.0       |
| Farmers who grow crops on land fertilized with animal manure |                    |                   |                    |                  |                 |           |
| Number                                                       | 287                | 31                | 83                 | 108              | 67              | 576       |
| %                                                            | 92.0               | 67.4              | 75.5               | 90.0             | 82.7            | 86.1      |
| % of total                                                   | 73.2               | 47.7              | 32.6               | 58.1             | 27.9            | 50.6      |
| Farmers who intend to use animal manure in future            |                    |                   |                    |                  |                 |           |
| Number                                                       | 106                | 32                | 113                | 42               | 32              | 325       |
| %                                                            | 27.0               | 49.2              | 44.3               | 22.6             | 13.3            | 28.5      |

Source: Economic Assessment of Livestock Development on Zanzibar Survey, 1999.

#### 3.3.3.1.4. Adoption of animal power

Animal power is becoming an important ingredient in the adoption of more intensive systems of livestock and crop production. Animal power used for farm work and for transport of farm produce also enhances the adoption process. In Unguja, the use of animal traction for land preparation is unfortunately limited as only 3% of the sample farmers reported using oxen for ploughing. For transport purposes however, animal power is more popular among 36% of the sample farmers who use animals to transport their own products and among 16% of those who use them for commercial transport (Table 47). The future potential of the use of animal power in Unguja however, appears encouraging as 27% of the sample farmers indicated their intentions to use animals for ploughing and 28% for transport purposes.

Table 47. Use of farm animals for traction and transport.

| Farmers who use animal power for:                     | District        |                |                 |               |              | All districts (n=1,138) |
|-------------------------------------------------------|-----------------|----------------|-----------------|---------------|--------------|-------------------------|
|                                                       | Central (n=392) | North-A (n=65) | North-B (n=255) | South (n=186) | West (n=240) |                         |
| Plowing: Number                                       | 14              | 1              | 7               | 1             | 14           | 37                      |
| %                                                     | 3.6             | 1.5            | 2.7             | 0.5           | 5.8          | 3.2                     |
| Own transport: Number                                 | 102             | 5              | 45              | 16            | 60           | 228                     |
| %                                                     | 26.0            | 7.7            | 17.7            | 8.6           | 25.0         | 20.0                    |
| Commercial transport: Number                          | 80              | 8              | 45              | 16            | 31           | 180                     |
| %                                                     | 20.4            | 12.3           | 17.7            | 8.6           | 13.0         | 15.8                    |
| Farmers who intend to use animal power in future for: |                 |                |                 |               |              |                         |
| Plowing: Number                                       | 226             | 18             | 49              | 4             | 7            | 304                     |
| %                                                     | 57.6            | 27.7           | 19.2            | 2.2           | 2.9          | 26.7                    |
| Transport: Number                                     | 97              | 48             | 90              | 31            | 51           | 317                     |
| %                                                     | 24.7            | 73.8           | 35.3            | 16.7          | 21.2         | 27.7                    |

Source: Economic Assessment of Livestock Development on Zanzibar Survey, 1999.

### 3.3.3.1.5. Dairy intensification

A good indicator of intensification in dairy production is the degree to which dairy farmers use improved cattle breeds and how well they manage the animals through better feeding and disease control. A good dairy processing and marketing system also offers more access to market outlets as well as the purchase of inputs, thus enhancing intensification of dairy production. In Zanzibar, intensification of dairy production is constrained by inadequate numbers of improved dairy cattle breeds; poor quality feed stuffs consisting mostly of local pastures; low adoption of improved feeding methods involving the use of crop residues and by-products, concentrates and mineral supplements; and the absence of a reliable and efficient dairy marketing system.

To establish productivity parameters for intensified dairy production, a sample of 54 smallholder dairy farmers involved in an FAO/UNDP dairy project was selected out of a total of 76 farmers. Interviews were conducted with the farm operator and information was obtained on their performance over the last two years. According to Table 48, age at first calving for 39 of the dairy farmers averaged 3.1 ( $\pm 2.8$  sd) years with a minimum of 1.7 years and a maximum of 7.6 years. The calving interval averaged 14.5 ( $\pm 4.9$  sd) months with a minimum of 12 months and a maximum of 22 months. Daily milk production averaged 8.2 liters with a rainy season production of 8.9 liters and a dry season production of 7.4 liters. Maximum potential milk production averaged 17.5 liters. The estimated average daily milk production represents a 17% increase over the estimate reported for 1995 at the Bambi research station. In general, cows stayed in milk for 7.5 months (228 days), the longest being 11.3 months (342 days) and the shortest being 3 months (91 days). Values of these productivity parameters fall within the range of values reported for dairy cattle raised at the Bambi and Kizimbani state farms.

Table 48. Production and reproduction parameters for dairy cattle in Unguja, Zanzibar, 1999.

| Parameter                         | Dairy farmers responding |      | Average | Std. de. | Maximum | Minimum |
|-----------------------------------|--------------------------|------|---------|----------|---------|---------|
|                                   | Number                   | %    |         |          |         |         |
| Age at first calving (years)      | 39                       | 72.2 | 3.1     | 2.8      | 7.6     | 1.7     |
| Calving interval (months)         | 35                       | 64.8 | 14.5    | 4.9      | 22.0    | 12.0    |
| Lactation length (months)         | 39                       | 72.2 | 7.5     | 1.7      | 11.3    | 3.0     |
| Milk production (liters/cow/day): |                          |      |         |          |         |         |
| Rainy season                      | 36                       | 66.7 | 8.9     | 3.8      | 17.7    | 1.7     |
| Dry season                        | 38                       | 70.4 | 7.4     | 3.5      | 17.3    | 1.8     |
| Average                           | 37                       | 68.5 | 8.2     | 3.6      | 17.5    | 1.8     |

Source: Economic Assessment of Livestock Development on Zanzibar Survey, 1999.

Among the project dairy farmers, 87% zero-grazed cattle while 4% practised semi-zero-grazing. For 17%, grazing of cattle on the range lands was an alternative source of feeding for their dairy cattle. For farmers who zero-grazed, 57% fed improved fodder while 56% fed crop by-products as the main feed stuffs. About 80% of the farmers provided concentrates while 56% provided mineral supplements (Table 49).

Table 49. Feeding systems and feed stuffs fed to dairy cattle in Unguja, Zanzibar, 1999.

| Feeding system and type of feeding material: | Dairy farmers responding |      |
|----------------------------------------------|--------------------------|------|
|                                              | Number                   | %    |
| Zero grazing                                 | 47                       | 87.0 |
| Semi-zero grazing                            | 2                        | 3.7  |
| Extensive free range                         | 9                        | 16.7 |
| Feed stuffs:                                 |                          |      |
| Improved fodder                              | 31                       | 57.4 |
| Crop by-products                             | 30                       | 55.6 |
| Concentrates                                 | 43                       | 79.6 |
| Mineral supplements                          | 30                       | 55.6 |
| Other                                        | 5                        | 9.3  |

Source: Economic Assessment of Livestock Development on Zanzibar Survey, 1999.

The main method of breeding dairy cattle is by use of improved bulls for 57% of the sample farmers, use of Artificial Insemination (AI) (56%) and use of local bulls (19%) (Table 50). Farmers acquired improved dairy cattle mainly from the State dairy farms located at Bambi, Kizimbani and Mtoni. For those who used AI, the services were mostly obtained from the AI Center (54%). For 44% of the farmers, improved dairy cattle were obtained from their neighbors and other farmers while 28% used their own bulls for crossing. Private organizations provided dairy cattle to only 4% of the dairy farmers.

The average expenditure incurred per head of improved dairy cattle was estimated at 324,000 TShs with a maximum of 600,000 and a minimum expenditure of 200,000 TShs (Table 50).

Table 50. Breeding methods for dairy cattle and sources of breeding materials in Unguja, Zanzibar, post-tsetse eradication.

| Breeding system and type of breeding material:             | Dairy farmers responding |      |
|------------------------------------------------------------|--------------------------|------|
|                                                            | Number                   | %    |
| Use of improved bulls                                      | 31                       | 57.4 |
| Use of artificial insemination                             | 30                       | 55.6 |
| Use of local bulls                                         | 10                       | 18.5 |
| Source of improved dairy cattle:                           |                          |      |
| State farm and Artificial Insemination Center              | 29                       | 53.7 |
| Own bull                                                   | 15                       | 27.8 |
| Neighbors and other farmers                                | 24                       | 44.4 |
| Private organizations                                      | 2                        | 3.7  |
| Other source                                               | 1                        | 1.8  |
| Expenditure for improved dairy cattle<br>(1,000 TSHS/head) |                          |      |
| Average                                                    | 324                      |      |
| Standard deviation                                         | 110                      |      |
| Maximum                                                    | 600                      |      |
| Minimum                                                    | 200                      |      |

Source: Economic Assessment of Livestock Development on Zanzibar Survey, 1999.

### 3.3.3.1.6. Processing and marketing of milk and dairy products

Presently in Zanzibar, the only dairy plant with a daily capacity of 10,000 liters is non-operational, having stopped functioning in 1995. The plant was operated by the Zanzibar Dairy Corporation (ZADACO) which was established under the Companies Act (Companies Decree, Cap 153) in October 1987 to take over the functions of the Mapinduzi dairy plant following its closure that year. Between 1986 and 1995 ZADACO supplied an average of 1,134 tons of reconstituted powder milk per year and processed 4,208 kgs of butter and 33,204 liters of yoghurt per year (Table 51). Milk supply peaked in 1992 but by 1995 only 248 tons were supplied, due to the closure of the plant in that year. Most of the milk and dairy products supplied by the plant came from dry powder milk procured under the World Food Program. Milk supply to the plant from smallholders was very low partly due to the fixed price and the absence of an organized milk collection system. Milk supply to the plant fluctuated considerably.

At the present time, milk processing and marketing within the traditional sector is still very rudimentary. Milk is marketed in rural areas in its raw form, neither processed nor pasteurized. The main market for milk and other dairy products is in the urban area of Zanzibar town. Since there is no organized system of milk collection in rural areas where the milk is produced and transport facilities are inadequate, smallholder producers have difficulty accessing this market with the small quantities (average 2-3 litres) available for sale. In some rural areas there are milk vendors (middlemen) who purchase milk from producers and sell directly to consumers. The differential between the established producer price and the informal market price makes it difficult for farmers to capitalize on the high demand coming from the urban area.

Table 51. Milk and milk products produced by the Zanzibar Dairy Corporation, 1986-1995.

| Year    | Product                |                |                  |                     |                   |
|---------|------------------------|----------------|------------------|---------------------|-------------------|
|         | Milk<br>(1,000 litres) | Butter<br>(Kg) | Ghee<br>(Litres) | Yoghurt<br>(Litres) | Cream<br>(Litres) |
| 1986    | 1,831                  | 6,923          | 343              | 62,888              | 20,336            |
| 1987    | 1,958                  | 8,769          | 20               | 0                   | 23,885            |
| 1988    | 1,534                  | 8,146          | 11               | 4,333               | 21,339            |
| 1989    | 1,118                  | 5,809          | 72               | 171,816             | 16,071            |
| 1990    | 1,447                  | 2,092          | 3                | 20,288              | 0                 |
| 1991    | 0                      | 0              | 0                | 0                   | 0                 |
| 1992    | 1,912                  | 3,013          | 372              | 25,545              | 8,037             |
| 1993    | 1,043                  | 4,512          | 590              | 18,380              | 0                 |
| 1994    | 444                    | 2,280          | 834              | 13,290              | 0                 |
| 1995    | 248                    | 532            | 122              | 15,496              | 0                 |
| Average | 1,134                  | 4,208          | 237              | 33,204              | 8,966             |

Source: Mapinduzi Dairy Farm

Notes: 1990 figure does not include data for December

Production in 1995 was up to September only

### 3.3.4. Predictive scenarios for livestock and agricultural development through 2005, 2010 and 2015.

The overall goal of Zanzibar's agricultural policy is to promote sustainable development of the agriculture sector. To achieve this goal, a number of policies have been outlined. These policies include among others, increased livestock and agricultural productivity, liberalization and rationalization of production and processing of export crops, and reforms in the agricultural pricing and marketing system. Taking into account the past performance of the livestock and agricultural sub-sectors over the last 15 years (1985 - 1999) and the available opportunities for intensifying animal and crop production, the future production of livestock and crop products in Zanzibar is projected for the years 2005, 2010 and 2015 under three scenarios of low, medium and high performance. The current period (1999), which serves as the baseline for comparison, is an extension of the outcome of the government's policies put in place some years ago. The future performance of the livestock and agriculture sub-sectors is measured in terms of the output of meat, milk, eggs, and food and cash crops. Output projections under each scenario are based on a series of assumptions and data on key parameter values obtained from various sources over the period from 1985/86 to 1999.

#### 3.3.4.1. Meat

Under the low performance scenario, a comparison of the total domestic meat production in 1999 with the production in 1986 shows a 50% increase in total meat within 14 years. In 2005, 2010 and 2015, total meat production is projected to be 20%, 41% and 65% greater than the base year 1999 production respectively (Table 52). Growth in per capita production during the same period is expected to be lower at 4% by 2005 (3.35 kg), 7% by 2010 (3.46 kg) and 11% by 2015 (3.58 kg) respectively, owing to a projected rapid increase in human population.

Currently, chicken accounts for 55% of total domestic meat production followed by beef with 40% while lamb and mutton account for the remaining 5%. Projected share of the projected production of chicken and beef are expected to decline marginally to 53% and 38% by 2015 while the production of lamb and mutton is expected to increase by about 8%.

Table 52. Projections for beef, poultry, lamb and mutton production in Unguja, Zanzibar, 1986-2015 (Low performance scenario)

| Year | Beef            |                 | Lamb and Mutton |                 | Poultry meat    |                 | All meats       |                 |
|------|-----------------|-----------------|-----------------|-----------------|-----------------|-----------------|-----------------|-----------------|
|      | Total (Mtonnes) | Per capita (kg) | Total (Mtonnes) | Per capita (kg) | Total (Mtonnes) | Per capita (kg) | Total (Mtonnes) | Per capita (kg) |
| 1999 | 641             | 1.27            | 88              | 0.17            | 896             | 1.78            | 1,625           | 3.22            |
| 2005 | 765             | 1.31            | 123             | 0.21            | 1,070           | 1.83            | 1,958           | 3.35            |
| 2010 | 887             | 1.34            | 162             | 0.24            | 1,241           | 1.88            | 2,290           | 3.46            |
| 2015 | 1,028           | 1.37            | 214             | 0.29            | 1,439           | 1.92            | 2,681           | 3.58            |

#### Assumptions

1. Human population growth rate 2.5% per year
2. Cattle population estimated to grow at 3% per year
3. Cattle offtake rate estimated at 11.4% per year based on the 1986-1995 average cattle slaughters from Unguja Island only
4. Carcass weight for cattle estimated at 103 kg per head based on FAO Production Yearbook estimates for Tanzania.
5. Sheep and goats population estimated to grow at 5.73% per year based on the 1978 and 1993 inter-census annual growth rate.
6. Sheep and goats offtake rate estimated at 23.4% per year based on 1993 sheep and goats estimates for mainland Tanzania.
7. Carcass weight for sheep and goats estimated at 10 kg per head based on Ministry of Agriculture estimates.
8. Poultry population estimated to grow at 3%, per year
9. Offtake rate for poultry is assumed at 100% due to the short cycle nature of poultry production
10. Carcass weight for poultry is assumed at 1 kg per head based on MANLR estimates.

Under the medium performance scenario, the actual production for 1986 is retained but the baseline production is estimated under the assumption that there is less disease risk. The 1986 - 1999 differential in production is thus estimated at 83%. Total meat production is projected to about double within 16 years from 1,983 metric tonnes in 1999 to 3,835 metric tonnes in 2015 (Table 53). On a per capita basis, domestic meat production is projected to increase by only 20% between 1999 (3.74 kg) and 2015 (4.50 kg). While chicken and beef account for 53% and 42% under this scenario, these shares are expected to decline only marginally while the share of lamb and mutton are expected to about double by the year 2015.

Table 53. Projections for beef, poultry, lamb and mutton production in Unguja, Zanzibar, 1986-2015 (Medium performance scenario)

| Year | Beef            |                 | Lamb and Mutton |                 | Poultry meat    |                 | All meats       |                 |
|------|-----------------|-----------------|-----------------|-----------------|-----------------|-----------------|-----------------|-----------------|
|      | Total (Mtonnes) | Per capita (kg) | Total (Mtonnes) | Per capita (kg) | Total (Mtonnes) | Per capita (kg) | Total (Mtonnes) | Per capita (kg) |
| 1999 | 827             | 1.57            | 111             | 0.21            | 1,045           | 1.96            | 1,983           | 3.74            |
| 2005 | 1,407           | 1.65            | 166             | 0.26            | 1,322           | 2.08            | 2,895           | 3.99            |
| 2010 | 1,274           | 1.75            | 233             | 0.32            | 1,609           | 2.18            | 3,116           | 4.25            |
| 2015 | 1,550           | 1.82            | 327             | 0.38            | 1,958           | 2.29            | 3,835           | 4.49            |

#### Assumptions

1. Human population assumed to grow at 3% per year based on 1988 population census estimates for Zanzibar.
2. Cattle population estimated to grow at 4% per year based on the 1978 and 1993 inter-census annual growth rate
3. Cattle offtake rate estimated at 13% per year based on slaughter cattle from Unguja Island only
4. Carcass weight for cattle estimated at 110 kg per head
5. Sheep and goats population assumed to grow at 7% per year
6. Sheep and goats offtake rate assumed to be 25% per year
7. Carcass weight for sheep and goats estimated at 11 kg per head based on MANLR estimates.
8. Poultry population estimated to grow at 4%, per year
9. Offtake rate for poultry is assumed at 100% due to the short cycle nature of poultry production



10. Carcass weight for poultry is assumed at 1.1 kg per head based on MANLR estimates.

The high performance scenario, which represents the maximum potential possible, is projected under general assumption of the availability of all opportunities and resources. Under these conditions, total meat production in 1999 is more than double that of 1986 while per capita production increases by about half. By the year 2015, total meat production would exceed current production by 135% *ceteris paribus*. However, per capita production will only be 36% greater (Table 54).

Under the high performance scenario, the current share of beef, lamb and mutton in total meat production is increased to 44% and 7% respectively while the share of chicken declines to 49%, suggesting that beef producers are currently taking more advantage of available opportunities to increase production than producers of the other livestock products. By 2015 however, both the share of beef and chicken in total meat production are expected to decrease to 41% and 45% respectively while the share of lamb and mutton is expected to double.

Table 54. Projections for beef, poultry, lamb and mutton production in Unguja, Zanzibar, 1986-2015 (Medium performance scenario)

| Year | Beef            |                 | Lamb and Mutton |                 | Poultry meat    |                 | All meats       |                 |
|------|-----------------|-----------------|-----------------|-----------------|-----------------|-----------------|-----------------|-----------------|
|      | Total (Mtonnes) | Per capita (kg) | Total (Mtonnes) | Per capita (kg) | Total (Mtonnes) | Per capita (kg) | Total (Mtonnes) | Per capita (kg) |
| 1999 | 1,101           | 1.96            | 171             | 0.31            | 1,207           | 2.15            | 2,479           | 4.42            |
| 2005 | 1,475           | 2.14            | 303             | 0.44            | 1,618           | 2.35            | 3,396           | 4.93            |
| 2010 | 1,883           | 2.30            | 488             | 0.60            | 2,065           | 2.52            | 4,436           | 5.42            |
| 2015 | 2,403           | 2.47            | 787             | 0.81            | 2,636           | 2.71            | 5,826           | 6.00            |

#### Assumptions

- Human population assumed to grow at 3.5% per year
- Cattle population assumed to grow at 5% per year
- Cattle offtake rate assumed to be 15% per year based on slaughters of cattle from Unguja Island only
- Carcass weight for cattle assumed to be 120 kg per head
- Sheep and goats population estimated to grow at 7% per year
- Sheep and goats offtake rate estimated at 30% per year
- Carcass weight for sheep and goats estimated at 12 kg per head based on MANLR estimates.
- Poultry population estimated to grow at 5%, per year
- Offtake rate for poultry is assumed at 100% due to the short cycle nature of poultry production
- Carcass weight for poultry is assumed at 1.2 kg per head based on MANLR estimates.

#### 3.3.4.2. Milk

Milk production under the low, medium and high performance scenarios is shown in Table 55. Under the low scenario, total domestic milk production increased by 48% from 2.45 million liters (6.7 liters per capita) in 1986 to 3.62 liters in (7.2 liters per capita) 1999. Total milk production is projected to increase by 19% by year 2005 with the rate of increase doubling by 2010 and more than tripling by 2015. Under the medium scenario, total milk production will increase from 6.1 million liters (11.5 liters per capita) in base year 1999 to 11.5 million liters (13.4 liters per capita) by year 2015. Under the optimal

production conditions assumed under the high performance scenario, domestic milk production in Zanzibar is projected to more than double from 11.2 million liters in 1999 to 24.4 million liters by the year 2015. Per capita production however, will increase by only 26% from 20 liters to 25 liters (Table 55).

Table 55. Projections for milk production per capita in Unguja, Zanzibar, 1986-2015.

| Year | Low scenario         |                     | Medium scenario      |                     | High scenario        |                     |
|------|----------------------|---------------------|----------------------|---------------------|----------------------|---------------------|
|      | Total (1,000 liters) | Per capita (liters) | Total (1,000 liters) | Per capita (liters) | Total (1,000 liters) | Per capita (liters) |
| 1999 | 3,619                | 7.18                | 6,119                | 11.50               | 11,167               | 19.92               |
| 2005 | 4,321                | 7.39                | 7,743                | 12.19               | 14,965               | 21.72               |
| 2010 | 5,009                | 7.58                | 9,421                | 12.79               | 19,099               | 23.34               |
| 2015 | 5,807                | 7.76                | 11,462               | 13.43               | 24,376               | 25.08               |

#### Assumptions

1. Human population growth rate 2.5%, 3% and 3.5% per year for low, medium and high scenarios respectively
2. Total cattle population estimated to grow at 3% , 4% and 5% per year for low, medium and high scenarios respectively
3. Proportion of indigenous cattle is estimated to be 94%, 92% and 90% for low, medium and high scenarios respectively
4. Cattle herd structure is composed of 41.23% cows for both indigenous and improved cattle.
5. Proportion of improved cattle is estimated at 6%, 8% and 10% for low, medium and high scenarios respectively.
6. Calving rates for indigenous cattle are assumed to be 55%, 60% and 65% for low, medium and high scenarios respectively
7. Calving rates of improved cattle are assumed to be 67%, 76% and 85% for low, medium and high scenarios respectively
8. Lactation lengths for indigenous cattle are estimated at 180, 200 and 220 days per year for low, medium and high scenarios respectively
9. Lactation lengths for improved cattle are estimated at 280, 305 and 320 days per year for low, medium and high scenarios respectively

#### 3.3.4.3. Eggs

Table 56 shows the projected total egg production and per capita production respectively under low, high and medium scenarios. Total production of eggs under low scenario is projected to increase from 10.4 million eggs in 1999 to 16.8 million eggs by 2015, an increase of about 60%. During the same time period, per capita egg production is projected to increase by about 4%. In the medium scenario, total egg production is projected to increase from 13.3 million eggs in 1999 to 24.9 million eggs by 2015, an increase of about 87%. For the same period, per capita egg production is expected to increase by 16%. In the high scenario, total egg production is projected to increase from 16.4 million eggs in 1999 to 35.9 million eggs by 2105, an increase of about 118%. During the same time period per capita egg production is projected to increase by 27%.

Table 56. Projections of total and per capita eggs production in Unguja, Zanzibar, 1986-2015

| Year | Low scenario     |                    | Medium scenario  |                    | High scenario    |                    |
|------|------------------|--------------------|------------------|--------------------|------------------|--------------------|
|      | Total<br>(1,000) | Per capita<br>(No) | Total<br>(1,000) | Per capita<br>(No) | Total<br>(1,000) | Per capita<br>(No) |
| 1999 | 20,950           | 42                 | 26,641           | 50                 | 32,918           | 59                 |
| 2005 | 25,016           | 43                 | 33,709           | 53                 | 44,113           | 64                 |
| 2010 | 29,000           | 44                 | 41,013           | 56                 | 56,301           | 69                 |
| 2015 | 33,619           | 45                 | 49,898           | 58                 | 71,856           | 74                 |

## Assumptions

1. Human population growth rate 2.5%, 3% and 3.5% per year for low, medium and high scenarios respectively
2. Total poultry population estimated to grow at 3%, 4% and 5% per year for low, medium and high scenarios respectively
3. Offtake rate for poultry is assumed at 100% for all the three scenarios
4. Carcass weight for poultry is assumed at 1 kg, 1.1 kg and 1.2 kg for low, medium and high scenarios respectively.

**3.3.4.4. Projections for livestock production systems**

Considering the livestock productions in 1993, 97% was classified as extensive system while only 3% was intensive. In 1999, extensive livestock production system constituted 86% while intensive systems made up 14%. This gives an annual decline of 1.9% for the extensive system. Based on this decline rate, the extensive system will constitute 76.7%, 69.6% and 63.3% by 2005, 2010 and 2015 respectively. Since the extensive system is declining, one can reasonably assume that this is in favor of more intensive systems. Thus the projected rates for the intensive systems are 23.3%, 30.4% and 36.7% for the years 2005, 2010 and 2015 respectively.

**3.3.4.5. Implications of the projections in livestock products**

Even though future total and per capita meat, milk and eggs production will increase in Zanzibar as projected, domestic production in general is very low. The projected quantities do not seem to meet the consumption needs which currently are estimated at 3.9 kg of red meat, 2.5 kg of poultry meat, 25 litres of milk and 50 eggs per capita per year. Nevertheless, the projections indicate that Zanzibar will continue to experience a deficit in meat, milk and eggs consumption and will continue to rely on imports of these products unless concerted efforts are made to increase domestic production.

**3.3.4.6. Crop production projections, 1999 to 2015.**

Zanzibar's agricultural sector review of 1999 estimated that the contribution of food crop production to domestic food supply declined from 60% in 1970 to 42% in 1980 and further to less than 35% in the 1990's. The decline is expected to continue due the downward trend in clove prices. As the main export crop of Zanzibar the price of cloves plummeted from US\$ 9,600 per tonne in the early 1980's to US\$600 in 1994. This adversely affected the agricultural economy, reducing the contribution of cloves to agricultural GDP from 98% in 1989 to 74% in 1993.

Total crop production in Zanzibar shows a lot of fluctuations from one year to the other due largely to uneven rainfall distribution. Crop production is also being constrained by low usage of improved inputs and high yielding crop varieties due to low purchasing power of the farmers and lack of credit facilities. Other constraints include poor farm management practices, poor soil fertility, crop pests and diseases and lack of effective extension and research services. However, the potential for increasing productivity is great given recent government policies and measures to open up opportunities for agricultural development in Zanzibar.

Projections for the main food and cash crops in Zanzibar are shown in Tables 57 to 59. These projections have been done under three scenarios which generally assume a declining growth rate in the low scenario, a constant growth rate in the medium scenario and a positive growth rate under the high scenario. These assumptions stem from the fact that crop production in Zanzibar has at best remained constant otherwise decreased over the last ten years. The main food crops like cassava, sweet potatoes, banana and rice have relatively higher total and per capita production than cash crops such as cloves. Both total and per capita food and cash crops production only show a significant growth rate in the high scenario only where a positive growth rate is envisaged. This indicates that deliberate efforts must be made by the GoZ to increase production of the main food and cash crops so as to earn the much need foreign exchange and meet the domestic consumption needs.

Table 57. Projections of total and per capita production of food and cash crops in Zanzibar, 1999-2015 (Low performance scenario).

| Crop                   | 1999        |                 | 2005       |                 | 2010        |                 | 2015       |                 |
|------------------------|-------------|-----------------|------------|-----------------|-------------|-----------------|------------|-----------------|
|                        | Total (MT)* | Per capita (kg) | Total (MT) | Per capita (kg) | Total (MT)* | Per capita (kg) | Total (MT) | Per capita (kg) |
| Cloves                 | 5.9         | 10              | 5.5        | 10              | 5.1         | 10              | 4.8        | 10              |
| Cassava                | 144.3       | 290             | 133.8      | 230             | 125.6       | 190             | 118.0      | 160             |
| Maize                  | 1.0         | 2               | 0.92       | 2               | 0.87        | 1               | 0.80       | 1               |
| Rice                   | 15.4        | 31              | 14.3       | 24              | 13.4        | 20              | 12.6       | 17              |
| Banana                 | 32.5        | 65              | 30.2       | 52              | 28.3        | 43              | 26.6       | 36              |
| Sorghum                | 0.32        | 1               | 0.30       | 1               | 0.28        | 0.4             | 0.27       | 0.4             |
| Legumes                | 1.28        | 3               | 1.2        | 2               | 1.1         | 2               | 1.0        | 1               |
| Sweet potato           | 22.3        | 45              | 21.0       | 36              | 19.6        | 30              | 18.4       | 25              |
| Other roots and tubers | 9.7         | 19              | 9.0        | 15              | 8.4         | 13              | 7.9        | 11              |

\* MT = metric tonnes

**Assumptions:**

In the low scenario, total annual production for each of the main cash and food crop is projected to decline by 1.25% per year. The agricultural sector review of 1999 for Zanzibar projected that total annual production for most food and cash crops have been declining steadily since 1980's through to 1990's. The downward trend is expected to continue.

Table 58. Projections of total and per capita production of food and cash crops in Zanzibar, 1999-2015 (Medium performance scenario).

| Crop                   | 1999        |                 | 2005       |                 | 2010        |                 | 2015       |                 |
|------------------------|-------------|-----------------|------------|-----------------|-------------|-----------------|------------|-----------------|
|                        | Total (MT)* | Per capita (kg) | Total (MT) | Per capita (kg) | Total (MT)* | Per capita (kg) | Total (MT) | Per capita (kg) |
| Cloves                 | 8.0         | 20              | 8.0        | 10              | 8.0         | 10              | 8.0        | 10              |
| Cassava                | 148.0       | 280             | 148.0      | 230             | 148.0       | 200             | 148.0      | 170             |
| Maize                  | 1.0         | 2               | 1.0        | 2               | 1.0         | 1               | 1.0        | 1               |
| Rice                   | 15.8        | 30              | 15.8       | 25              | 15.8        | 21              | 15.8       | 19              |
| Banana                 | 33.3        | 63              | 33.3       | 53              | 33.3        | 45              | 33.3       | 39              |
| Sorghum                | 0.3         | 1               | 0.3        | 1               | 0.3         | 0.5             | 0.3        | 0.4             |
| Legumes                | 1.3         | 2               | 1.3        | 2               | 1.3         | 2               | 1.3        | 2               |
| Sweet potato           | 23.1        | 43              | 23.1       | 36              | 23.1        | 31              | 23.1       | 27              |
| Other roots and tubers | 9.9         | 19              | 9.9        | 16              | 9.9         | 14              | 9.9        | 12              |

In the medium scenario, total annual production for each of the main cash and food crops is projected to remain the same as that of 1997. The current production levels have almost remained constant since 1997.

Table 59. Projections of total and per capita production of food and cash crops in Zanzibar, 1999-2015 (High performance scenario).

| Crop                   | 1999        |                 | 2005       |                 | 2010        |                 | 2015       |                 |
|------------------------|-------------|-----------------|------------|-----------------|-------------|-----------------|------------|-----------------|
|                        | Total (MT)* | Per capita (kg) | Total (MT) | Per capita (kg) | Total (MT)* | Per capita (kg) | Total (MT) | Per capita (kg) |
| Cloves                 | 10.0        | 20              | 38.1       | 60              | 116.4       | 140             | 355.3      | 370             |
| Cassava                | 185.0       | 330             | 705.6      | 1,020           | 2,153.3     | 2,630           | 6,571.2    | 6,750           |
| Maize                  | 1.6         | 3               | 6.1        | 10              | 18.6        | 20              | 56.7       | 60              |
| Rice                   | 1.6         | 3               | 6.1        | 10              | 18.6        | 20              | 56.7       | 60              |
| Banana                 | 52.1        | 90              | 198.8      | 290             | 606.7       | 740             | 1,851.6    | 1,900           |
| Sorghum                | 0.5         | 1               | 1.9        | 3               | 6.0         | 7               | 18.4       | 19              |
| Legumes                | 2.0         | 4               | 7.8        | 10              | 23.8        | 30              | 72.6       | 70              |
| Sweet potato           | 36.1        | 60              | 137.8      | 200             | 420.6       | 510             | 1,283.5    | 1,320           |
| Other roots and tubers | 15.5        | 30              | 59.3       | 90              | 181.1       | 220             | 552.6      | 570             |

In the high scenario, total annual production for each of the main cash and food crop is projected to increase by 1.25% per year.

### 3.3.5. Issues requiring attention by the Zanzibar authorities and other partners

It has been reported elsewhere that cattle herds without trypanosomosis are more efficient than infected cattle herds because the absence of trypanosomosis will enable herds to grow faster over time, resulting in more milk and meat production. Apart from benefits from

increased milk and meat production, there will be benefits to crop production through the increased availability of animal manure and animal draught power for traction and transportation of agricultural products.

In general, the farm level survey results suggest that tsetse eradication has stimulated livestock production as well as increased crop-livestock integration. Cattle herd sizes have increased between 1985/86 and 1999, suggesting that tsetse control and eradication measures undertaken between 1985/86 and 1997 have stimulated livestock growth. Moreover, farmers intend to keep more crossbred cattle and use more manure for crop production. The increase in land productivity for some of the crops mentioned above may be associated with intensification in the smallholder farming systems in Zanzibar. Indicators of intensification in crop production include adoption of high yielding crop varieties, use of inorganic and organic fertilizers and other inputs that can raise output per unit area. Use of improved crop varieties by smallholder farmers in Zanzibar appear to be low. Very few farmers reported the use of improved varieties for rice, vegetables, fruits and maize. None of the sample farmers reported the use of improved banana varieties. Thus, the increase in banana productivity may be associated with increased use of manure (organic matter) after tsetse intervention, suggesting more integration of livestock and crops in the farming systems after tsetse intervention. There is evidence of crop-livestock integration from the farmer level survey data in terms of use of animal manure for crop production (Table 43) and use of farm animals for traction and transport of agricultural produce (Table 44).

The rate at which the smallholder farmers in Zanzibar can intensify livestock and crop production and benefit from tsetse eradication depends on the rate at which they adopt technologies. Technologies such as use of crossbred animals which have relatively high production potential, use of improved seed varieties, use of improved breeding methods, disease control and good animal nutrition are necessary for intensification. However, a number of constraints for which farmers have limited knowledge and/or resources to address were identified from the survey results. Farmers may need external assistance to accelerate adoption of various technologies.

- Most of the farmers interviewed (77%) keep indigenous cattle which are low meat and milk producers, producing between 1 and 3 litres of milk per cow daily. Options available to the farmer for obtaining a high yielding animal are purchase of a crossbred animal to replace the indigenous animal or upgrading the indigenous cattle using artificial insemination and/or improved bulls. The acquisition of improved livestock breeds such as crossbred animals is mainly constrained by inadequate finances as indicated 46% of the farmers interviewed. Upgrading of indigenous cattle is constrained by unavailability of artificial insemination services (presently the artificial insemination unit is non-operational due to lack of liquid nitrogen) and improved bulls as majority of the farmers keeping indigenous cattle use local bulls. Currently the artificial insemination unit is non-operational due to lack of liquid nitrogen.

Interventions by the government and other parties interested in livestock development may include:

- (i) Establishment of heifer in trust schemes or smallholder credit schemes. Heifer in trust schemes may be more effective than credit schemes since credit given in cash may be directed to other uses unless it is given in kind.
  - (ii) Provision of artificial insemination service as a strategy to improve genetic potential of dairy animals.
  - (iii) Establishment of improved bull centres to complement the use of AI
  - (iv) Training of farmers on heat detection and record keeping
- Almost all interviewed farmers are aware and knowledgeable that tsetse flies have been eradicated in Unguja, Zanzibar. However, other diseases such as East coast Fever, Lumpy Skin Disease, Helminthiasis, Foot and Mouth Disease, Heart Water and Pneumonia as ranked by farmers in declining order of importance still constrain cattle production in rural areas. Most of the Veterinary Investigation Centers (VICs) lack the necessary drugs and vaccines

Intervention by government and/or other parties interested in livestock development

- (i) Strengthening animal health service in the rural areas.
  - (ii) Establish a revolving fund for purchase of veterinary drugs and vaccines
  - (iii) Gradually involve the private sector in the provision of veterinary service
  - (iv) Training of farmers on characteristics of common diseases
- Most of the farmers (86%) interviewed are practising extensive free grazing whereby cattle graze on natural pastures without supplementation. The remaining 14% practice zero or semi-zero grazing whereby animals are fed on natural pastures or home grown fodder with little supplementation. Very few farmers reported the use of supplementary feeds such as concentrates, minerals, crop by-products. Cassava peels was the only crop being used as reported by some of the sample farmers.

Intervention by government and/or other parties interested in livestock development

- (i) Farmer training on the use of supplementary feeds

- (ii) Feed conservation techniques for use during dry season
  - (iii) Fodder establishment-fodder grasses mixed with legumes to improve nutritive value
- Overall the results of the survey show that the number farmers selling milk as well as average quantity of milk sold have increased after tsetse intervention. Moreover, farmers interviewed indicated their intentions to increase milk production in the future through adoption of improved cattle breeds. This will obviously increase milk production in the rural areas and the issue of establishing an organized and efficient milk marketing and processing system cannot be ignored. The only milk processing plant in Zanzibar town which could process surplus milk from farmers and increase shelf life has been closed. Milk marketing is already being regarded by the Ministry of Agriculture as a constraint to dairy development in the Island (Personal Communication with Dr. Kassim Juma).

Intervention by government and/or other parties interested in livestock development

- (i) Encourage formation of farmer groups in the rural areas for input supply and milk marketing
- (ii) Promote informal milk processing and marketing by private market agents
- (iii) Establish milk collection centers in rural areas

The fact that household income averaged TShs 41,232 (US\$ 52) per month with approximately 97% of the households reporting an average income of less than TShs 100,000 (US\$ 125) is a reflection of the generally low income level of rural households in Zanzibar. This underlines the need for intervention and justifies streamlined efforts and increased investments for poverty elimination in rural areas of Zanzibar.



#### **4.0. FRAMEWORK FOR ECONOMIC IMPACT ASSESSMENT OF TSETSE CONTROL/ERADICATION**

In this section, we first explain why we need to assess the impact of a tsetse/trypanosomosis control/eradication programme. Next, we review some of the previous work on the economic impact of tsetse and trypanosomosis. This is followed by a discussion of the various components a framework should contain. The data requirements for applying the framework then follow.

##### **4.1. Why a framework for impact assessment**

To objectively evaluate the economic impact of a tsetse control/eradication programme and provide valuable and reliable information for decision-making, an analytical framework is required. However, before developing such a framework, it is essential to know why impact assessment should be carried out at all. This helps to determine the various factors to be considered, how each factor interacts with one another, what type of data should be collected for each defined parameter and how the data are to be used. It also helps to accommodate all the changes (direct and indirect) that have or are likely to occur (at farm or national level) as a result of the intervention.

Specifically, an impact assessment of a tsetse control/eradication intervention should answer three important questions. The first relates to the public investment nature of the intervention. Does or will the intervention generate sufficiently large benefits to justify the investments incurred? Answers to these questions are needed for decisions on future investments in other disease control/eradication interventions. Secondly, who are the main beneficiaries of the eradication intervention? To what extent do not only livestock and crop producers benefit from the absence of trypanosomosis, but also consumers from the increase in crop and livestock production?. Finally, what lessons can effectively be drawn from how the control/eradication intervention was or will be implemented? Providing answers to these questions requires that accurate data be collected on the relevant parameters; that appropriate procedures and methodologies be defined for analyzing the data; and that an analytical framework be developed to tie together all the relevant factors associated with the incremental changes attributable to the intervention.

##### **4.2. Previous work**

Trypanosomosis is a parasitic disease caused by the tsetse fly. The disease causes significant economic losses in livestock, notably cattle, sheep, goats, donkeys and pigs, leading to reduced meat, milk, manure and draught power. FAO (1994) estimates that annual losses in the potential of farm production due to trypanosomosis amounts to about US\$ 4 billion with annual control costs ranging between US\$ 600 million and US\$ 1.2 million. WHO (1999) also estimates that over 55 million people are at risk of contracting human trypanosomosis with more than 300,000 people infected with "sleeping sickness". Before proposing a framework for deriving such estimates, a brief review of some of the impact assessment methods used in the past is in order.

Previous attempts to assess the impacts of the incidence of trypanosomosis on the productivity of animals have either compared the infection status of individual animals within a herd or have compared the level of risk among herds across different geographical areas. In a study of the epidemiology and incidence of trypanosomosis, Camus (1981a) tested over 3,000 animals in 191 cattle herds in the north of Ivory Coast for the rate of infection with trypanosomosis. Based on productivity data established on fertility and mortality parameters, he developed a static model for estimating losses due to trypanosomosis. After calculating the maximum extraction rates for each of four genotypes -- N'Dama, Baoule, N'Dama x Baoule and Zebu crossbreeds -- he then estimated the average annual losses per animal due to trypanosomosis as the difference between the potential production value of trypanosomosis-infected and non-infected cattle herds. Using this method, Camus (1981b) estimated the annual total losses attributable to trypanosomosis in northern Ivory Coast to be 92 million Francs CFA. While the work of Camus provided the basis for a methodology for economic assessment of trypanosomosis control, it failed to account for the dynamics of the cattle herd and its evolution over time. Far from taking a holistic view, the model only partially considered the outputs of the cattle sub-sector, neglecting the yet important output -- milk. Camus' framework therefore generated values that were grossly underestimated.

Brandl (1988) assessed the economic impacts of trypanosomosis control in cattle by the use of a herd simulation model. The model was superior to that of Camus by its very dynamic nature. The model simulated the development of a herd in a time sequence, on the basis of initial herd structure, productivity and management parameters as well as the physical and monetary outputs. With 24 age classes for female and male animals, 17 input parameters for each age class are specified for each of two scenarios involving *with tsetse control* and *without tsetse control*. Herd growth, milk off-take and animal off-take were estimated *ex ante*, and the profitability of tsetse control in terms of the benefits and costs associated with the use of the sterile insect technique to eradicate tsetse in the Sideradougou area of southern Burkina Faso were assessed. Brandl then compared a scenario involving tsetse eradication using the sterile insect technique with three other scenarios involving no tsetse control but with low, medium and high prevalence levels of trypanosomosis infection. Results of the herd simulation model showed that *without tsetse control*, the cattle population in the Sideradougou area would increase by less than 1% per year and between 2% and 5% per year *with tsetse control*. Based on these growth rates, he estimated that the presence of trypanosomosis would reduce milk off-take by 38% and animal off-take by 5% to 3.1%. By applying results of the herd model to alternative control methods, Brandl (1988) concluded that for smaller areas of application, the sterile insect technique would only become profitable with medium and high losses due to trypanosomosis and with calculation periods of over 15 years.

Putt *et al.* (1980) have provided one of the most comprehensive economic assessments of the costs and benefits of tsetse control operations in northern Nigeria. By using statistics of trypanocidal treatments augmented by the expert opinions of veterinarians and local stock owners, they estimated the costs and benefits of tsetse eradication under two levels

of assumptions. The first assumption was that tsetse eradication projects are only justifiable if the constraints they remove are of sufficient importance that the opportunities they create are picked up by people and secondly, that people would apply the same agricultural and livestock techniques after tsetse clearance as they did before. This assumption however applied strictly for rare situations like Northern Nigeria where after tsetse was cleared, people maintained the same traditional livestock production techniques. The more likely situation is that after tsetse has been cleared in an area, people will likely adopt some mixed farming practices, limited integration of crop and livestock production and sedentarization of livestock. This situation as pointed out by Putt *et al.* (1980 pp 443-444) is more likely to occur for most of Africa and the survey findings in Zanzibar certainly reflect this likely situation.

Drawing from results of field studies conducted under contrasting disease and production situations across Africa, Swallow (1999) developed a dynamic framework for measuring the impacts of trypanosomosis on agriculture. Following the classification of Putt *et al.* (1980), Swallow distinguished between the direct and indirect impacts of the incidence of trypanosomosis and those of trypanosomosis risk. He showed that the direct impacts of the incidence of trypanosomosis could be measured from morbidity, mortality, work efficiency of animals and the costs associated with the treatment of trypanosomosis-diseased animals whereas the direct impacts of trypanosomosis risk could be derived from the management activities that livestock farmers undertake because of the risk to which their animals are, or could be, exposed to. The indirect impacts on the other hand, of trypanosomosis incidence, could be measured as the changes that occur in human settlement, crop production and land use attributable to the reduced productivity of existing animals while the indirect impacts of trypanosomosis risks could be measured as the changes in human settlement and crop production that occur because of the livestock management practices followed by farmers who raise livestock under trypanosomosis risk. Applying the framework, Swallow (1999) concluded that trypanosomosis directly constrains the productivity of cattle, sheep and goats by reducing birth rates, increasing abortion rates, and increasing mortality rates among young animals; making the production of meat, milk and animal traction by existing animals less efficient. In mixed crop-livestock production systems Swallow (1999) notes, the impact of trypanosomosis on the number and work efficiency of oxen has repercussions on crop production with estimated reductions in total agricultural production varying from 2% to 10%.

The important point about the preceding studies is that a framework for economic impact assessment should account for all the effects, direct as well as indirect, attributable to tsetse and trypanosomosis. Such a framework is provided in Figure 2. It suggests that the impact of tsetse/trypanosomosis should be viewed and assessed in a wider context of the farming system and economy, being cognisant of the varied and complex interrelationships among the system's physical, biological and socio-economic components.

Figure 2. Framework for economic impact assessment of tsetse control and eradication

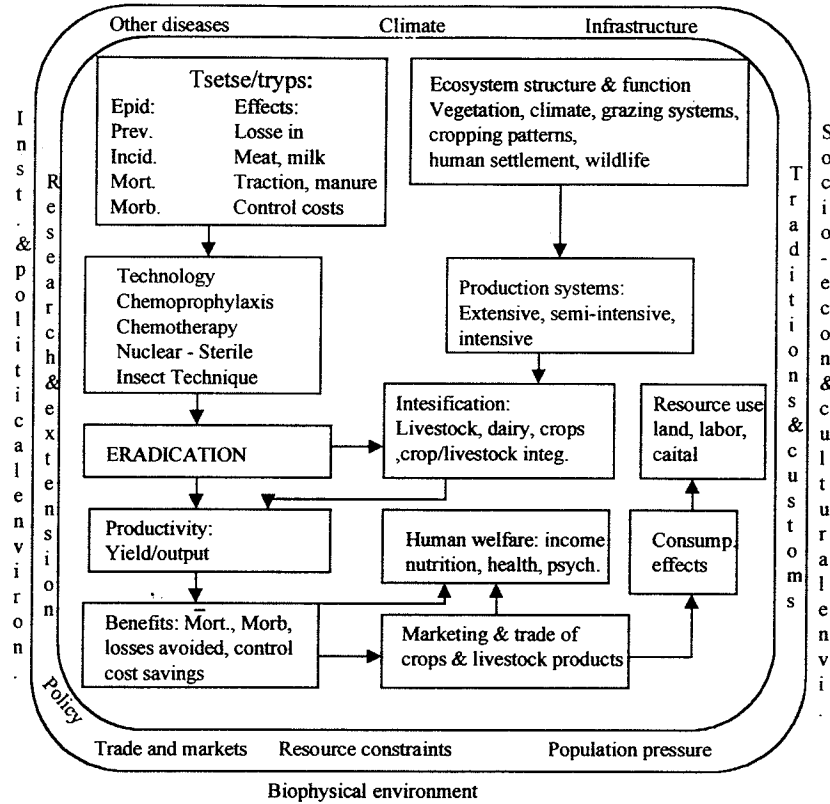

Fig. 2. Framework for economic impact assessment of tsetse control/eradication.

### **4.3. Important considerations for developing a framework**

The type of effects to be quantified are the following:

#### **4.3.1. Direct losses**

For Zanzibar where human trypanosomosis is not an issue, the direct economic effects of animal trypanosomosis arise from:

- (i) mortality losses incurred;
- (ii) morbidity losses experienced; and
- (iii) the costs of control (treatment and prophylaxis) and/or eradication.

The consequences of the direct losses are sometimes difficult to value in economic terms. It may be easy to value the death of an animal but it may not be easy to quantify and value the effects of poor performance due to increased rates of abortion or poor growth rates due to anaemia. Trypanosomosis-infected animals are sometimes subject to the influences of other animal diseases as well as malnutrition, making it difficult to isolate the productivity effects of trypanosomosis. Also, the death of an animal and the magnitude with which its productivity is affected by trypanosomosis may well depend on the level of trypanosomosis risk to which it is exposed and whether or not it is trypanotolerant or well managed.

The direct costs of treating animals by chemotherapy, protecting them from infection by chemoprophylaxis or total elimination of the vector by mechanical or nuclear means provides a good indication of the direct consequences of trypanosomosis. However, the absence of proper diagnosis and optimal treatment methods sometimes make it difficult to obtain accurate estimates of the benefits and costs. Occasionally, costs become overstated when there is blanket treatment of herds in which not all animals are infected and understated when infected animals go untreated. These facts should be taken into consideration by any framework designed to assess economic impact.

#### **4.3.2. Indirect losses**

What is of greater significance than the direct losses due to trypanosomosis but more difficult to value in economic terms are the indirect losses which arise from:

- (i) Constraints on the production of cattle, sheep, goats and donkeys (including some wildlife);
- (ii) constraints placed on land use for crop and livestock production; and

(iii) limitations placed on crop-livestock integration.

These constraints are due to peoples' perceptions of the risk of their animals contracting trypanosomosis and their adoption of production systems that fail to make use of the natural resources available in tsetse infested areas. In areas of high challenge, livestock keeping is highly precluded and therefore the indirect consequences of trypanosomosis are most evident. Because land use in areas of high trypanosomosis risk is avoided (mostly when human sleeping sickness is concerned) and only restricted to periods of low risk, optimal use of natural resources is reduced, thus making the indirect economic losses far more important than losses due to mortality and morbidity.

Successful control/eradication of tsetse infestations removes the direct losses and permits more efficient utilization of natural resources, thus giving rise to a number of direct and indirect benefits. Among the direct benefits are the mortality and morbidity losses avoided and the savings in control and treatment costs. These benefits clearly depend on the level of trypanosomosis challenge because areas with low challenge are usually well utilized by livestock whereas the high challenge in other areas often precludes livestock and even crop production. The benefits to be quantified and valued include:

#### **4.3.3. Direct benefits**

##### **4.3.3.1. Mortality losses avoided**

Complete eradication of tsetse from an area clears the cattle and other livestock species of the trypanosome parasite thus eliminating the possibility of an animal getting sick and eventually dying from trypanosomosis. The product gained by preventing the death of an animal constitutes the benefit arising out of the mortality avoided as the disease is eradicated. The value of a lost animal to the livestock owner due to death or premature slaughter is to be measured in terms of the market price that the owner would have obtained under conditions of good health.

##### **4.3.3.2. Morbidity losses avoided**

Livestock infected with the trypanosome parasite experience a reduction in productivity due to a loss in condition, lowered milk production, decreased fertility, abortion and a reduction in work force. Because of the varying response of individual animals to infection, these productivity parameters are to be quantified and valued with care. Farm level data on these parameters may be difficult to obtain. However, they can be estimated under experimental conditions.

##### **4.3.3.3. Control and treatment costs saved**

Several methods have been used in Zanzibar to control and eradicate tsetse and trypanosomosis. Bush clearing was widely practised during the 1950s and 1960s, particularly in Mangapwani. During the 1970s and 1980s, a combination of various

control methods involving insecticide impregnated screens, bait-oxen fly-rounds and biconical traps were used. Chemoprophylactic measures were applied and infected cattle were treated with trypanocidal drugs. Following the suppression of apparent fly densities by the various control methods, the Sterile Insect Technique was used to finally eradicate the disease in 1997. With eradication, these control measures are no longer being undertaken, leading to important benefits from the savings in control costs.

#### **4.3.4. Indirect benefits**

Indirect benefits occur when eradication of tsetse and trypanosomosis removes constraints on land, making it available for use by people. The changes that occur in the use of the land constitute the benefits, which only become evident when (i) the land is used for livestock production; (ii) the land is arable and is used for crop production; and (iii) interactions occur between livestock and crop production activities leading to mutual benefits.

##### **4.3.4.1. Constraints on livestock production eliminated**

Eradication of tsetse flies from an area creates opportunities for increased carrying capacity as livestock utilize the fodder and water resources which otherwise would not be accessible to animals in the presence of tsetse flies. It also avoids the losses in livestock that would have been incurred in their attempt to utilize the resources in the tsetse infested areas. These benefits are best measured in terms of the additional meat, milk, hides and skins, manure and work force from animals resulting from the additional carrying capacity. The magnitude of the benefits however, depend on (i) the presence of fodder and water resources in the tsetse free areas and (ii) the extent to which people move cattle and other livestock into the area to utilize the resources. To determine the additional carrying capacity, data is needed on (i) total land made available following tsetse eradication; (ii) the proportion of land that is suitable for use by animals; (iii) percentage of stock owners making use of the tsetse free area; and the number of animals making use of the resources in the area. Taking all of these factors into account may not truly reflect the value of the benefit realized from an animal that makes use of the additional carrying capacity. What matters in the final analysis is data on the value of the animal at sale.

##### **4.3.4.2. Constraints on agricultural production eliminated**

The extent to which agricultural production is constrained by tsetse flies in Unguja is limited because of the absence of human sleeping sickness, the risk of which often keeps people away from cultivating land in the infested areas. There is no evidence in Unguja that people have abandoned the cultivation of arable land because of tsetse flies. Rather, those agricultural production activities that go together with raising cattle, donkeys and small ruminants have been constrained because of the fear of these animals contracting trypanosomosis. Quantifying the benefits of eliminating constraints on agricultural production therefore depends on the ability to isolate the avoided losses in crop production.

#### **4.3.4.3. Constraints on livestock-crop integration eliminated**

Elimination of tsetse and trypanosomosis from an area enhances greater integration between livestock and agricultural production as cattle, sheep, goats and donkeys are allowed to remain in the arable areas being cultivated. As the animals make use of crop residues and by-products, they in turn provide manure and other animal products (e.g. meat, milk, hides and skins, animal power) to the farmer. As animal manure improves soil quality, crop yields increase, leading to greater agricultural output. This depends however, on (i) the symbiotic relationship between stock owners and farmers and how they are willing to co-exist with each other; and (ii) how well farmers and stock raisers adopt technologies that promote increased use of crop residues and by-products as animal feed, manure for soil fertility improvement and animal traction for plowing and transport. To value these benefits, data are needed on farm sizes, proportion of farmers integrating livestock and agricultural activities, percentage of farmers adopting animal traction for plowing and traction.

#### **4.4. Application of the framework to economic analysis**

The economic impact of a disease control/eradication intervention is assessed in relation to the value of the outcome without the intervention. Returns or benefits derived from the intervention represent the additional earnings realised if the intervention takes place compared to what would or would have happened in its absence. Benefits and costs of the intervention are measured as the incremental changes between the intervention and the non-intervention scenario. Benefit-cost analysis then compares the value of the benefits with the value of the costs as a guide to determine whether the intervention is economically superior to the alternative scenario.

There are generally two types of costs associated with a disease control/eradication intervention: (i) Costs incurred to control/eradicate the disease that would not have been incurred in the absence of the intervention; and (ii) any livestock production revenues foregone that are no longer earned due to the control/eradication measures. There are also two types of benefits from disease control/eradication: (i) Increased revenue from improved productivity, i.e. revenue due to avoided production losses from mortality and morbidity, as well as (ii) savings in control costs avoided after achieving eradication. Incremental benefits are estimated as the difference between production value obtained "with" intervention versus the "without" scenario. The "with" scenario represents what actually obtains with the intervention and so is usually based on available data. The "without" scenario, on the other hand, describes what was happening "before" the intervention or would have happened "after" had the intervention not taken place.



#### 4.4.1. Data needs for estimating mortality losses

It is useful to spell out the data variables in more detail as a guide for compiling sufficient data for assessing economic impact.

Total cattle population (same for sheep, goats and donkeys if important in the system)

*The following variables for calves, immature cattle and adult cattle:*

Cattle population under risk: types, numbers, by production system

% of cattle affected by trypanosomosis

% of cattle dead (mortality) due to trypanosomosis (calves, immature and adult cattle)

% of cattle dead from other animal diseases (calves, immature and adult cattle)

Prevalence: in calves, immature and adult cattle

Incidence: in calves, immature and adult cattle

Mortality: in calves, immature and adult cattle

Life weight (kg/head)

Milk yield (liters/per cow per year)

Beef yield (kg carcass/head/year)

% of breeding females

Calving rate (%)

Manure production (kg/head/year)

Hectares worked (hours/draught animal/year)

Off-take rates (%) in calves, immature and adults per year

Farm gate prices for beef, milk, lamb and mutton, draught animal, manure

#### 4.4.2. Data needs for estimating morbidity losses

Total cattle population (same for sheep, goats and donkeys if important in the system)

*The following variables for calves, immature cattle and adult cattle:*

Cattle population under risk: types, numbers, by production system

% of cattle affected by trypanosomosis

Prevalence: in calves, immature and adult cattle

Incidence: in calves, immature and adult cattle

% of life weight reduction due to trypanosomosis

% of milk reduction due to trypanosomosis

% reduction in work force due to trypanosomosis

% reduction in manure due to trypanosomosis

Age at first calving (months)

Calving interval (months)

Calving rate (%)

Calf/cow ratio

Lactation length (days)

Abortion rate (%)

Farm gate prices for beef, milk, lamb and mutton, draught animal, manure

#### 4.4.3. Data needs for estimating control/eradication costs

##### *Capital investment costs*

Buildings (administrative and factory)  
 Radiation equipment and accessories  
 Equipment (office, laboratory, factory, etc.)  
 Airplanes  
 Vehicles  
 Traps and targets

##### *Recurrent costs*

Labor costs (salaries, wages, allowances)  
 Building running and maintenance (water, electricity, etc.)  
 Vehicle and airplane running and maintenance (fuel, spare parts, lubricants, etc.)  
 Quantities used of insecticides, chemicals and drugs and their prices  
 Trap maintenance and checking  
 Packaging materials  
 Administrative costs (e-mail, telephone, fax, etc.)

#### 4.4.4. Data needs for estimating indirect losses on livestock and agriculture production

Total national land area  
 % of total land area infected by tsetse flies  
 % of land area abandoned due to tsetse flies  
 % of total land area cleared of tsetse flies  
 % of cleared land that is arable  
 % of cleared land fit for grazing  
 % of cleared land used by cattle (and other livestock species)  
 % of cleared land cultivated for crops  
 Number of farmers acquiring new land tsetse cleared areas  
 Number of farmers cultivating cleared area  
 Number of farmers grazing cattle in cleared area  
 % of cattle farms with infected cattle  
 % of cattle farms with infected cattle losing cattle due to trypanosomosis  
 % of herd size infected by trypanosomosis (indigenous and improved cattle by age and sex structure)  
 % of infected cattle dead due to trypanosomosis (indigenous and improved cattle by age and sex structure)  
 % of farms with milking cows (indigenous and improved cattle)  
 % of farms with milking cows infected by trypanosomosis (indigenous and improved cattle)

- % of farms with infected milking cows having a reduction in milk production (indigenous and improved cattle)
- % of farms using crop residues and by-products as animal feed
- % of farms feeding concentrates and mineral supplements to cattle
- % of farms using animal manure for soil fertility improvement
- % of farms using animal power for plowing and transport
- % of adult cattle used for traction (oxen)
- Crop area prepared per animal per year
- Crop yields per hectare
- Farm-gate prices of crops cultivated
- Reduction in traction due to the disease per traction animal per
- % of farms adopting improved breeds of cattle (and other livestock species)

#### 4.4.5. Other data needs

- Discount rate (%)
- Exchange rate (TSHS per 1US\$)
- Elasticities of demand and supply for various livestock products and crops
- Shadow prices of livestock products and crops
- Quantities of livestock products and crops imported and exported
- Value of livestock products and crops imported and exported
- Total human population
- Gross Domestic Product (GDP)
- Agricultural GDP
- Livestock GDP

#### 4.4.6. Calculations required

##### 4.4.6.1. Mortality and morbidity losses

###### *Beef loss:*

- Land area covered by cattle at risk of trypanosomosis
- Proportion of land covered by cattle at risk, %
- Cattle at risk of trypanosomosis, %
- Herd in trypanosomosis area at year start
- Number of breeding females
- Number of calves born during the year
- Herd size affected by trypanosomosis during the year
- Number of calves affected by trypanosomosis
- Number of calves dead due to trypanosomosis**
- Number of adult males in the herd
- Number of immature cattle in the herd
- Number of immature cattle with trypanosomosis
- Number of immature cattle dead due to trypanosomosis**

Number of adult cattle in the herd  
 Number of adult cattle with trypanosomosis  
**Number of adult cattle dead due to trypanosomosis**  
**Total cattle dead due to trypanosomosis**  
 Calf beef loss due to trypanosomosis mortality  
 Immature cattle beef loss due to trypanosomosis mortality  
 Adult cattle beef loss due to trypanosomosis mortality  
**Total beef loss due to trypanosomosis mortality**  
 Number of calves morbid from trypanosomosis  
 Calf beef loss from morbidity  
 Number of immature morbid cattle  
 Immature beef loss due to morbidity  
 Number of adult cattle morbid from trypanosomosis  
 Adult cattle beef loss due to morbidity  
**Total beef loss due to trypanosomosis morbidity**  
**Total herd beef loss due to trypanosomosis**  
**Farm gate value of beef loss**  
**National value of beef loss**

***Milk loss:***

Number of milking cows with trypanosomosis  
 Survival rate of milking cows with trypanosomosis  
 Number of milking cows surviving trypanosomosis  
 Quantity milk reduction from trypanosomosis morbidity  
 Number of milking cows dead due to trypanosomosis  
 Quantity of milk lost from dead cows  
**Total milk loss due to trypanosomosis**  
**Farm gate value of milk loss**  
**National value of milk loss**

***Animal traction loss***

Number of adult cattle used for traction  
 Reduction in traction days due to trypanosomosis  
**Traction hectares reduced due to trypanosomosis**  
**Farm gate value of traction hectares lost**  
**National value of traction hectares lost**

***Manure loss***

Quantity of manure lost due to dead calves, immature and adult cattle  
 Quantity of manure from calves reduced due to trypanosomosis

Quantity of manure from immature reduced due to trypanosomosis  
 Quantity of manure from adult cattle reduced due to trypanosomosis  
**Total manure loss due to trypanosomosis**  
**Farm gate value of manure loss**  
**National value of manure loss**

***Total loss due to trypanosomosis:***

Total mortality and morbidity losses  
 Total cost of trypanosomosis control/eradication  
**Total farm gate value of output loss from trypanosomosis**  
**Total national cost of trypanosomosis**  
**Trypanosomosis loss per head of cattle**  
**Trypanosomosis loss per hectare in trypanosomosis area**

**4.4.6.2. Economic value of livestock and agriculture production under conditions of trypanosomosis**

***Livestock***

Total calves net of trypanosomosis mortality  
 Calves net of total mortality  
 Number of calves for disposal  
 Immature cattle net of trypanosomosis mortality  
 Immature cattle net of total mortality  
 Number of immature cattle for disposal  
 Adult cattle net of trypanosomosis mortality  
 Adult cattle net of total mortality  
 Number of adult cattle for disposal  
**Total number of cattle for disposal**  
 Beef production from calves  
 Beef production from immature cattle  
 Beef production from adult cattle  
**Total beef production**  
**Gross national value of beef production**  
 Milking cows net of trypanosomosis mortality  
 Milking cows net of total mortality  
**Total milk production**  
**Gross national value of milk production**  
 Number of hectares of animal traction  
**Total national income from animal traction**  
 Total manure production  
**Total national value of manure production**  
 Quantity of hides produced

**Total national value of hides**

Net cattle population at year end

Herd growth, heads of cattle

**National value of herd growth****Total gross national value of output**

Total value of cattle at year 1 start and year X end

**Total costs of production****Total net farm income from cattle in trypanosomosis area**

Productivity per cattle head in trypanosomosis area

% change in herd size

Year-end carrying capacity, ha/head

% change in carrying capacity

Carrying capacity in trypanosomosis area

**Crops**

Total number of crop farms cultivated in tsetse cleared areas

Total land area cultivated in tsetse cleared areas

Total quantity (of each crop) produced in tsetse cleared areas

Value of crops produced in tsetse cleared areas

Quantity of forage, crop residues and by-products produced in tsetse cleared areas

Value of forage, crop residues and by-products produced in tsetse cleared areas

Crop productivity per ha in trypanosomosis cleared areas

**4.4.6.3. Decision criteria**

Benefit-cost ratio

Net present value

Internal rate of return

Total welfare gains

Producer welfare gains

Consumer welfare gains

## 5.0. Summary and conclusion

The purpose of this assignment was to collect baseline data on the livestock and agriculture situation in Unguja, Zanzibar before the initiation of tsetse/trypanosomosis control/eradication in 1985/86 and the current situation in 1999. While serving as inputs for a future economic impact assessment of tsetse/trypanosomosis control/eradication, the data were to be used to (i) describe the developments in livestock and agriculture that have occurred since the initiation of the intervention in 1985/86 and (ii) predict future developments in livestock and agriculture production. To enable the economic impact assessment to be carried out, a framework of analysis was to be developed.

The approach adopted consisted of a review of the relevant documents on tsetse/trypanosomosis in Zanzibar, collection of data on relevant parameters from these secondary sources; field visits involving informal discussions with key informants and other stake holders; design of a field survey using a formal questionnaire; and data compilation, analysis and report writing.

Based on the informal discussions, the secondary and primary data gathered, there is the general conclusion that the livestock and agriculture situation in Unguja, Zanzibar in 1999 has changed significantly from what it was before the initiation of tsetse/trypanosomosis control/eradication in 1985/86. The overall change is evidenced by increased growth in the livestock sub-sector relative to the crops sub-sector. Livestock contribution to GDP for example, increased from 12% in 1986 to 34% in 1997 whereas the share of crops in GDP dropped from 81% in 1986 to 59% in 1997.

Whereas areas cultivated for crops such as cassava, sweet potatoes, tania (cocoyams), maize and plantain increased or remained the same after 1985/86, yields obtained for these crops declined, suggesting a decline in productivity of land used to produce these crops. Improvements have however, been observed for some crops. Areas cultivated for cloves, yams and coconuts declined after 1985/86, but the yields obtained increased, suggesting that productivity of these crops has improved. This is not surprising especially for cloves as there has been deliberate efforts by the government to revive cloves production in Zanzibar. With regard to livestock, not only has the relative proportion of farms raising cattle and small ruminants increased in 1999 compared to 1985/86, the number of farms with improved cattle breeds has also increased, making it possible for improved cattle to supply 35% of the total milk production compared to about 10% before the intervention. Evidence for intensification of livestock and agricultural activities in Unguja is provided by the increased crop-livestock integration through more farmers using manure for their crop production while in turn using crop by-products to feed their animals. The use of animal power for ploughing and transport activities is also increasing. While several factors may have contributed to the achievement of these results, there is general consensus among people in Zanzibar that the eradication of tsetse and trypanosomosis in 1997 has resulted in significant gains in the livestock sub-sector. Zanzibar's Agricultural Sector Review of 1999 indicates that the IAEA sponsored tsetse-eradication project produced some of the

best successful results of donor funded projects in East Africa. The information in this report provides some support to this claim.

Although the total production of livestock and agriculture has been projected to increase in the near future, per capita consumption of major livestock and crop products generally fall short of the planned targets. Current production trends indicate that the domestic consumption needs may not be met. Imports will continue to be needed to fill the deficit. However, continued reliance on food imports cannot be sustained and could impact negatively to both livestock and agricultural production. Deliberate efforts must be made by Zanzibar authorities in collaboration with private sector and other stakeholders to tackle constraints which are affecting the livestock and agricultural sector. These constraints include poor livestock and crop extension services, processing and marketing of crop and livestock products, diseases and low usage of inputs and improved crop and livestock varieties. Provision of affordable and smallscale oriented credit facilities could greatly improve livestock and crop production.

This report does not purport to have assessed the economic impact of tsetse eradication in Unguja, Zanzibar. Rather, it only provides data on some key parameters and proposes a framework that could be used to carry out an economic impact assessment.



## References

- Baumhover, A.H., A.J. Graham, B.A. Bitter, D.E. Hopkins, W.D. New, F.H. Dudley and R.C. Bushland, 1955. "Screw-worm control through release of sterilized flies". *Journal of Economic Entomology*, 48: 462.
- Bouvry Stratford M. 1986. Cattle trypanosomiasis situation on Zanzibar (URT/81/017) FAO Field document No. 7. Zanzibar, 21 pp.
- Brandl, E.F. 1988. *Economics of trypanosomiasis control in cattle*. Farming Systems and Resource Economics in the Tropics, Vol. 1. Wissenschaftsverlag Vauk Kiel, Germany.
- Camus, E. 1981a. Epidemiologie et incidence clinique de la trypanosomose dans le nord de la Cote d'Ivoire. *Rev. Elev. Med. Vet. Pays Trop.*, 34 (3): 289-295.
- Camus, E. 1981b. Evaluation economique des pertes provoques par la trypanosomose sur quatre types genetiques bovins dans le nord de la Cote d'Ivoire. *Rev. Elev. Med. Vet. Pays Trop.*, 34 (3): 297-300.
- FAO (1994). Opening Address of Y. Cheneau in: A systematic approach to tsetse and trypanosomosis control; Proceedings of the FAO Panel of Experts; held in Rome, Italy, from 1 to 3 December 1993. FAO Animal and Prod. Health Paper, 121, 1-3.
- FAO (Food and Agriculture Organisation), 1987. Livestock Development Phase III. Project findings and recommendations. UNDP/FAO Project DP/URT/81/017. Rome 49 pp.
- GURT/FAO/IAEA (Government of United Republic of Tanzania/Food and Agriculture Organisation/International Atomic Energy Agency), 1994. Tsetse Fly Eradication on Zanzibar. Project Document URT/5/016, Zanzibar.
- Hafidh, H.S., Khamis, I.S., Salum, S.H. and Stratford, M.B. 1987. Background data for the control of cattle trypanosomiasis on Zanzibar, Tanzania. Report prepared for the Ministry of Agriculture and Livestock, Zanzibar. FAO Project URT/81/017 Field document No. 10. 43 pp.
- IAEA/FAO (International Atomic Energy Agency/Food and Agriculture Organisation), 1997. Eradicating the Tsetse Fly on Zanzibar Island.
- Jordan, A.M. 1986. *Trypanosomiasis control and African rural development*. Longman Publishers, London. pp. 223-242.
- Kadigi, R.J. 1995. Industry review of ruminant livestock. Ministry of Agriculture, Dar es Salaam, Tanzania.

Knippling, E.F. 1960. "The eradication of the screw-worm fly". *Sci. Amer.*, 203: 54-61.

Langley, P.A., H. Maly and F. Ruhm, 1972. "Application of the sterility principle for the control of the Mediterranean fruit fly (*Ceratitis capitata*): Pupal metabolism in relation to mass-rearing techniques". *Ent. Exp. Appl.*, 15: 23-34.

URT (United Republic of Tanzania) Statistical Abstracts. Department of Statistics, Ministry of State Planning and Investment, Zanzibar. 1997 and previous years.

Molyneux, D.H., 1977. Vector relationships in the trypanosomatidae. *Advances in Parasitology*, 15, 1-82.

Muller, P. and Nagel, P. 1994. Tsetse fly eradication on Zanzibar Island. Environmental surveys. FAO Project. URT/5/016-07-01. Rome, 97 pp.

Putt, S.N.H., A.P.M. Shaw, R.W. Matthewman, D.M. Bourn, M. Underwood, A.D. James, M.J. Hallam and P.R. Ellis. 1980. *The social and economic implications of trypanosomiasis control: A study of its impact on livestock production and rural development in northern Nigeria*. Study No. 25. 549 pp.

RGZ (Revolutionary Government of Zanzibar), 1998. Five year post tsetse eradication development programme in Zanzibar. Ministry of Agriculture, Livestock and Natural Resources, Commission of Livestock and Agriculture, Zanzibar.

RGZ (Revolutionary Government of Zanzibar), 1999. Agriculture Sector Review. Report prepared by Food and Agriculture Organisation of the United Nations. April, 1999.

Schonefeld, A.A. 1988. Pilot trial for the control of *Glossina austeni* on the Island of Zanzibar. FAO Project TCP/URT/6758. Assistance in Trypanosomiasis Control, Zanzibar, Rome, 33 pp.

Spharim, Y. 1974. Economic feasibility of establishing a pilot plant for control of the Mediterranean fruit fly by distribution of sterile males. IAEA-SM-186/22: 151-158. International Atomic Energy Agency, Vienna.

Swallow, M.B. 1999. Impacts of trypanosomiasis on African Agriculture. Paper presented at the International Scientific Council for trypanosomiasis Research and Control, Maputo, Mozambique, Sept. 29 - Oct. 4, 1997.

Turner, D.A. 1984. The distribution of the tsetse fly, *Glossina austeni* Newstead on Zanzibar (Unguja) Island, Republic of Tanzania: A report of a survey carried out between November 1983 and February 1984. IAEA Report.

URT (United Republic of Tanzania), 1998. Five year post-tsetse eradication livestock development programme in Zanzibar. Agriculture and Livestock Commission, Zanzibar.

UNDP/FAO, 1993. Animal Disease Control Project, Zanzibar. The URT Project findings and recommendations. Rome, 25 pp.

WHO, (1999). World Health Organization, Division of Control of tropical Diseases (CTD). Internet Home Page of 12 June 1999. <http://www.who.int/ctd/html/trypanoburtre.html>

Wizara ya Kilimo, Mifugo na Mali Asili (1999) Ripoti ya Mwaka 1998. February 1999.

Zanzibar Integrated Land and Environmental Management Project (1995). National Land Use Plan.

## ANNEX 1

Table A 1.1. Total, per capita and agricultural Gross Domestic Product in Zanzibar, 1980 to 1997.

| Year                        | GDP at current prices |            |              |                    |                              |                          | GDP at constant 1976 prices |            |              |
|-----------------------------|-----------------------|------------|--------------|--------------------|------------------------------|--------------------------|-----------------------------|------------|--------------|
|                             | Total                 | Per capita | Agricultural | Agric. as % of GDP | Livestock as % of agric. GDP | Crops as % of agric. GDP | Total                       | Per capita | Agricultural |
|                             | Million TShs          | TShs       | Million TShs |                    |                              |                          | Million TShs                |            | Million TShs |
| 1980                        | 1,431                 | 2,849      | 654          | 45.7               |                              |                          | 624                         | 1,242      | 285          |
| 1982                        | 2,229                 | 4,206      | 1,201        | 53.9               |                              |                          | 784                         | 1,479      | 423          |
| 1984                        | 2,870                 | 5,134      | 1,613        | 56.2               |                              |                          | 685                         | 1,225      | 385          |
| 1986                        | 4,767                 | 8,927      | 1,816        | 38.1               | 12.2                         | 81.0                     | 734                         | 1,375      | 280          |
| Average annual <sup>1</sup> | 2,756                 | 4,998      | 1,272        | 46.0               |                              |                          | 726                         | 1,329      | 334          |
| 1988                        | 9,412                 | 16,421     | 4,433        | 47.1               | 22.2                         | 72.0                     | 768                         | 1,340      | 362          |
| 1990                        | 16,921                | 27,903     | 7,919        | 46.8               | 15.3                         | 77.5                     | 815                         | 1,344      | 381          |
| 1992                        | 34,698                | 54,965     | 13,012       | 37.5               | 22.7                         | 69.2                     | 880                         | 1,394      | 330          |
| 1994                        | 56,537                | 84,766     | 19,279       | 34.1               | 28.9                         | 64.5                     | 942                         | 1,228      | 321          |
| 1996                        | 84,225                | 110,775    | 32,342       | 38.4               | 32.6                         | 61.2                     | 1,038                       | 1,365      | 398          |
| 1997                        | 99,208                | 126,266    | 37,997       | 38.3               | 33.8                         | 59.4                     | 1,089                       | 1,386      | 417          |
| Average annual <sup>2</sup> | 41,437                | 59,432     | 16,184       | 39.0               | 24.0                         | 67.3                     | 893                         | 1,350      | 349          |

<sup>1</sup> Includes all the years from 1980 to 1986

<sup>2</sup> Includes all the years from 1987 to 1997

## ANNEX 2.

Table A 2.1. Names of villages sampled.

| North A   | North B        | West        | South      | Central     |            |
|-----------|----------------|-------------|------------|-------------|------------|
| Moga      | Mangapwani     | Mfenesini   | Pete       | Charawe     | Ghana      |
| Mkokotoni | Fujoni         | Mwakaje     | Muungoni   | U. Kaeboni  | Tunduni    |
| Pale      | Zingwezingwe   | Bumbwisudi  | Kitogani   | U. Kaepwani | Mgeni haji |
|           | Kiomba mvua    | Mwachealale | Muyuni A   | Bungi       | Pagali     |
|           | Mkadini        | Mbuzini     | Muyuni B   | Kikungwi    | Bambi      |
|           | Kitope         | Fuoni       | Muyuni C   | Ndijani     | Cheju      |
|           | Kilombero      | Kimara      | Kibuteni   | Kiboje      | Jendele    |
|           | Muwanda        | Kizimbani   | Makunduchi | Machui      | Kisomanga  |
|           | Donge Mtambile | Dole        |            | Mchangani   | Umbuji     |
|           | Donge Kipande  | Kianga      |            |             |            |
|           | Mahonda        |             |            |             |            |

## ANNEX 3

Table A 3.1. Number of sampled villages and households.

| Districts     | Cattle population (1993) | Human population (1995) | Number of villages (1987) | Number of Households (1995) | Number of villages infested with tsetse flies, 1985/86 | Number of villages to be sampled | Number of households to be sampled |
|---------------|--------------------------|-------------------------|---------------------------|-----------------------------|--------------------------------------------------------|----------------------------------|------------------------------------|
| North A       | 8,465                    | 70,000                  | 27                        | 11,290                      | 1                                                      | 3                                | 68                                 |
| North B       | 6,849                    | 44,000                  | 23                        | 7,097                       | 13                                                     | 11                               | 266                                |
| Central       | 12,743                   | 60,500                  | 36                        | 9,758                       | 31                                                     | 18                               | 414                                |
| South         | 3,406                    | 27,500                  | 17                        | 4,435                       | 10                                                     | 8                                | 198                                |
| Urban         | 1,164                    | 203,000                 | 1                         | 32,742                      | 0                                                      | 0                                | 0                                  |
| West          | 13,132                   | 72,000                  | 21                        | 11,613                      | 9                                                      | 10                               | 254                                |
| All Districts | 45,750                   | 477,000                 | 125                       | 76,935                      | 64                                                     | 50                               | 1,200                              |

## ANNEX 4

**Instructions and explanations to enumerators accompanying questionnaire for the economic impact assessment of tsetse control and eradication in Zanzibar Island**

Prior to completing each questionnaire, the enumerator must establish whether the person being interviewed is the household head or the major decision maker. If none of these is available the questionnaire should not be completed for that household. The enumerator is expected to have properly understood each question in the questionnaire.

Upon meeting the farmer the enumerator should explain the purpose of the survey and request the farmer's permission to have a discussion with him/her. Seek for his/her patience and cooperation during the exercise. Do not read each question to the farmer. Rather, endeavor to have a friendly, yet constructive dialogue with the farmer while tactfully trying to fill in the responses. Do not make any promises to the farmer. During the interview if there are any answers that do not respond adequately to the question(s) being asked, probe further until you establish that the question has been adequately responded to. If the farmer does not seem to understand the question as it is, devise an alternative way of phrasing the

question such that the message gets to the farmer. Also, if the respondent fails to remember the answer to a question relating to the period before or during tsetse intervention, refer to particular events at that time. Ask if an extension agent ever visited his/her farm at that time and see if he/she can remember.

**The first ten questions** pertain to the household head or the household decision maker. They seek to obtain general information on household characteristics and are quite straight forward.

**Questions 11 to 55** deal with the livestock enterprise as a whole. These questions seek to establish the status of livestock development at the farm level from when the farmer began livestock production to the present. They also seek to explore the future potential of livestock development with particular emphasis on the use of improved livestock genetic resources, especially cattle, small ruminants and poultry. As well, they seek to establish livestock productivity parameters, animal disease situation with emphasis on tsetse and trypanosomosis, feeding and management practices.

**Questions 11 and 12** are intended to establish the proportion of farmers who were involved in livestock production before and after the tsetse control and eradication program and the respective livestock numbers during those periods. They also want to explore reasons for changes in livestock numbers. The enumerator should complete the table in **question 12** paying particular attention to the numbers of each livestock species at the time the farmer began the livestock enterprise and the current situation. The enumerator should use his personal judgement to determine whether what the farmer intends to have in the future is realistic. It should be guided by his present resources.

**Questions 13 to 15** seek to establish the availability, sources, costs and the use of improved livestock species.

**Questions 16 to 20** are self explanatory.

**Questions 21 to 31** are intended to establish farmers' knowledge of tsetse and trypanosomosis, their control strategies, costs, risk avoidance strategies and the potential for development in view of tsetse eradication. **Questions 21 to 23** attempt to determine the proportion of farmers who were affected by tsetse and trypanosomosis, how they responded to the disease and when the last case was observed. Bearing in mind that tsetse was eradicated in 1997 and laboratory results indicate that no case of animal trypanosomosis has been detected so far since then, any response by a farmer to part two of **question 23** after 1997, the farmer should be noted and questioned further. Such farmers will need to be followed up later. Recognizing that no data exist in Unguja on the incidence, morbidity and mortality due to trypanosomosis **question 24** seeks to establish these parameters. **Question 30** seeks to establish the proportion of farmers who have moved into or are making use of areas cleared of tsetse.

**Questions 31 to 47** are specific to the dairy enterprise because dairy production offers more possibilities for increased intensification and therefore contributing to food security. These questions seek to establish the pre- and post-tsetse eradication productivity parameters for dairy. They also seek to establish the implications of tsetse eradication on the current status of dairy production and the future potential for development. For **question 32** the enumerator should establish the type and size of containers used by the farmer for measuring milk. For **question 35** the enumerator should specify the age of the cow during its first calving in years or months which ever is applicable. For **question 45** the enumerator should establish that the farmer is using the feed material on a regular basis and not just once or occasionally.

**Questions 47 to 54** are meant to establish crop-livestock interactions through the use of manure for crop production and pasture improvement, use of crop by-products for animal feed and the use of animal power. To complete the table in **question 48**, the enumerator should first of all establish whether the manure is used in fresh form or dry. Then ask for the type of containers used by the farmer, make an assessment of its weight when filled with manure and find out the number of fully filled containers used for each purpose

Questions 56 to 66 deal with crop production and seek to establish the past, present and future potential of the crop production system at the farm level. They also attempt to establish the implications of tsetse eradication on current crop production and the future potential. Allusion is made to the fact that as tsetse become eradicated, increased intensification will call for the use of the improved varieties. Therefore it is necessary to establish farmers' access to and use of improved plant genetic material in questions 60 and 61. Questions 62 to 66 are intended to explore the extent to which farmers are already and will take advantage of the tsetse cleared areas for crop production. For question 57 the enumerator should first of all establish the type and size of container used by the farmer for measuring the output from each crop. The enumerator should also use his/her judgement to establish the size of the plot by physical inspection where possible. It should be stated whether the plot size is in acres or hectares.

## ANNEX 5

Table A 5.1. Enumerators used during the survey.

| No. | Enumerator name                 | Qualification                                            | Year of experience |
|-----|---------------------------------|----------------------------------------------------------|--------------------|
| 1   | Mashavu Yahya Ali               | Certificate in agriculture & livestock Production (CALP) | 6                  |
| 2   | Abdulla Moh'd abdulla           | Certificate in Animal health & production                | 16                 |
| 3   | Moh'd Ali Ameir                 | Diploma in Range Management                              |                    |
| 4   | Fatma w. suleiman               | Diploma in Animal Health                                 |                    |
| 5   | Maryam R. Mzee                  | Certificate in Animal health & Production                | 8                  |
| 6   | Abubakar Hassan Kisoma          | Diploma in Animal Production                             | 11                 |
| 7   | Silima Hassan                   | Diploma in Crop Production                               | 19                 |
| 8   | Salum Mwinyi                    | Certificate in agriculture & Livestock Production        | 11                 |
| 9   | Amos Lamek                      | Diploma in horticulture                                  | 19                 |
| 10  | mussa Salum Abdulla             | Certificate in agriculture & Livestock Production        | 4                  |
| 11  | Daudi Ramadhani                 | Certificate in agriculture & Livestock Production        | 18                 |
| 12  | Juma Omar                       | Diploma in Lab. tech. Chemistry                          | 19                 |
| 13  | Sudi Nahoda Hassan              | Msc. Agronomy                                            | 15                 |
| 14  | Abdul Rahim Hamid               | Diploma in Animal Production                             | 19                 |
| 15  | Said Kassim Yussuf              | Certificate in AI. & Animal Health                       | 22                 |
| 16  | Abeid Khamis Ramad'n            | Diploma in Animal Health                                 | 18                 |
| 17  | Juma Ramadhan Juma              | Certificate in agriculture & Livestock Production        | 4                  |
| 18  | Ishaka Abdul Wakil              | Msc. Agronomy                                            | 15                 |
|     | <b>Name of field supervisor</b> | <b>Qualification</b>                                     |                    |
| 1   | Khalfan M. Saleh                | Diploma in tsetseControl                                 | 12                 |
| 2   | Dr. Waridi Abdulla<br>Mussa     | Doctor of veterinary Medicine                            | 13                 |

## ANNEX 6

Fig. Prevalence of trypanosomosis in Jozani forest (south district) and Mgeni Haji (central district) of Unguja, Zanzibar.

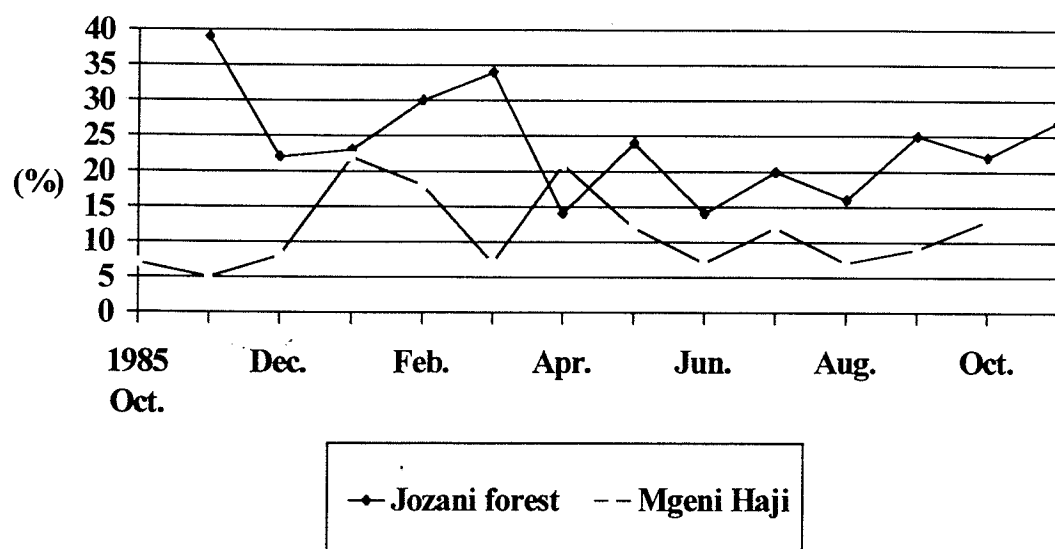

## ANNEX 7

Table A 7.1. Crop production in Unguja, Zanzibar, pre-tsetse control - 1975/75 to 1985/86 (tons)

| Year            | Cloves | Cassava | Maize | Rice   | Banana  | Sorghum | Legumes | Sweet potato | Other roots and tubers |
|-----------------|--------|---------|-------|--------|---------|---------|---------|--------------|------------------------|
| 1975/76         | 10,159 | 299,268 | 4,639 | 22,137 | 107,182 | 3,427   | 530     | 63,111       | 4,246                  |
| 1976/77         | 4,441  | 257,300 | 3,615 | 25,914 | 103,336 | 2,607   | 1,605   | 45,893       | 8,215                  |
| 1977/78         | 769    | 209,422 | 3,252 | 24,755 | 99,950  | 1,069   | 1,174   | 32,459       | 20,075                 |
| 1978/79         | 12,571 | 187,791 | 2,979 | 10,192 | 77,713  | 1,188   | 1,042   | 31,118       | 10,379                 |
| 1979/80         | 6,482  | 269,159 | 3,431 | 22,464 | 67,873  | 1,557   | 2,356   | 17,847       | 16,569                 |
| 1980/81         | 7,497  | 289,356 | 4,774 | 20,166 | 60,718  | 2,298   | 2,894   | 41,029       | 31,896                 |
| 1981/82         | 6,150  | 200,768 | 3,596 | 18,580 | 36,013  | 1,990   | 2,036   | 34,892       | 23,478                 |
| 1982/83         | 7,226  | 319,137 | 3,463 | 18,357 | 117,543 | 1,893   | 2,768   | 43,417       | 27,600                 |
| 1983/84         | 4,698  | 231,796 | 2,164 | 14,645 | 54,623  | 1,875   | 1,619   | 34,405       | 22,094                 |
| 1984/85         | 8,900  | 275,800 | 5,249 | 20,118 | 113,635 | 2,452   | 2,956   | 62,046       | 28,727                 |
| 1985/86         | 136    | 221,748 | 2,011 | 15,635 | 60,064  | 870     | 1,715   | 19,671       | 20,170                 |
| Average 1975-86 | 6,275  | 251,049 | 3,561 | 19,360 | 81,695  | 1,929   | 1,881   | 38,717       | 19,404                 |

Source: Department of Agriculture, Zanzibar



Table A 7.2. Land area under food crop production in Unguja, Zanzibar, pre-tsetse control - 1975/76 to 1985/86 (hectares)

| Year              | Cassava | Maize | Rice   | Banana | Sorghum | Legumes | Sweet potato | Other roots and tubers |
|-------------------|---------|-------|--------|--------|---------|---------|--------------|------------------------|
| 1975/76           | 65,839  | 12757 | 32467  | 23580  | 12562   | 2915    | 23143        | 934                    |
| 1976/77           | 56606   | 9942  | 38007  | 22734  | 9560    | 8849    | 16829        | 2318                   |
| 1977/78           | 46073   | 8942  | 36292  | 21989  | 3921    | 6500    | 11903        | 5294                   |
| 1978/79           | 41314   | 8206  | 14948  | 17097  | 4356    | 2356    | 11410        | 2682                   |
| 1979/80           | 59215   | 9433  | 32948  | 14932  | 5708    | 13278   | 6544         | 4282                   |
| 1980/81           | 63658   | 13129 | 29576  | 13358  | 8425    | 16528   | 15044        | 7931                   |
| 1981/82           | 44169   | 9889  | 26957  | 7923   | 7296    | 11737   | 12794        | 5796                   |
| 1982/83           | 70217   | 9523  | 26924  | 25862  | 6941    | 15544   | 15919        | 6879                   |
| 1983/84           | 50996   | 5952  | 21479  | 12019  | 6875    | 8947    | 12615        | 5692                   |
| 1984/85           | 60676   | 14459 | 29507  | 25000  | 8992    | 16616   | 22750        | 7428                   |
| 1985/86           | 48,785  | 5,529 | 22,992 | 13,214 | 3,192   | 9,275   | 7,213        | 5,201                  |
| Average 1975-1985 | 55,231  | 9,796 | 28,372 | 17,973 | 7,075   | 10,231  | 14,197       | 4,948                  |

Table A 7.3. Crop production in Unguja, Zanzibar, during tsetse control and eradication, 1986/87 to 1996/98 (tons)

| Year            | Cloves | Cassava | Maize | Rice   | Banana  | Sorghum | Legumes | Sweet potato | Other roots and tubers |
|-----------------|--------|---------|-------|--------|---------|---------|---------|--------------|------------------------|
| 1986/87         | 12,035 | 156,799 | 1,768 | 8,112  | 54,240  | 460     | 1,833   | 30,651       | 14,610                 |
| 1987/88         | 2,027  | 174,131 | 1,184 | 20,361 | 109,098 | 335     | 1,828   | 14,034       | 14,856                 |
| 1988/89         | 12,703 | 113,840 | 1,268 | 20,570 | 22,800  | 438     | 937     | 14,232       | 7,357                  |
| 1989/90         | 881    | 208,236 | 1,087 | 17,959 | 27,726  | 392     | 2,296   | 34,447       | 10,668                 |
| 1990/91         | 1,705  | 179,352 | 1,392 | 12,186 | 46,672  | 563     | 2026    | 30,732       | 13340                  |
| 1991/92         | 16,052 | 175,826 | 1,236 | 11,258 | 23,184  | 443     | 1,208   | 34,407       | 9,022                  |
| 1992/93         | 1,757  | 149,122 | 645   | 15,580 | 18,476  | 445     | 991     | 34,600       | 11,216                 |
| 1993/94         | 1,774  | 168,364 | 812   | 11,690 | 20,472  | 272     | 1,403   | 26,011       | 14,280                 |
| 1994/95         | 5,344  | 141,128 | 1,093 | 11,719 | 16,626  | 139     | 941     | 12,853       | 6,201                  |
| 1995/96         | 1,073  | 133,940 | 522   | 18,607 | 21,824  | 113     | 916     | 15,432       | 6,180                  |
| 1996/97         | 11,368 | 26,948  | 229   | 26,045 | 5,796   | 68      | 10      | 6,941        | 1,776                  |
| Average 1985-97 | 6,065  | 147,971 | 1,021 | 15,826 | 33,356  | 333     | 1,308   | 23,121       | 9,955                  |

Source: Department of Agriculture, Zanzibar

Table A 7.4. Land area under food crop production in Unguja, Zanzibar, during tsetse control and eradication, 1986/87 to 1996/97 (hectares)

| Year              | Cassava | Maize | Rice   | Banana | Sorghum | Legumes | Sweet potato | Other roots and tubers |
|-------------------|---------|-------|--------|--------|---------|---------|--------------|------------------------|
| 1986/87           | 34,496  | 4,861 | 16,245 | 11,933 | 1,687   | 10,279  | 11,239       | 3,612                  |
| 1987/88           | 43,533  | 7,397 | 25,451 | 27,275 | 2,795   | 11,248  | 5,848        | 3,985                  |
| 1988/89           | 28,460  | 7,925 | 23,966 | 5,700  | 3,647   | 5,663   | 5,930        | 1,986                  |
| 1989/90           | 52,059  | 6,793 | 22,448 | 6,932  | 3,264   | 16,289  | 14,353       | 2,810                  |
| 1990/91           | 44,838  | 8,733 | 23,571 | 11,668 | 4,688   | 14,764  | 12,805       | 3,553                  |
| 1991/92           | 43,957  | 7,722 | 16,705 | 5,796  | 3,689   | 8,446   | 14,336       | 2,365                  |
| 1992/93           | 37,281  | 4,030 | 19,616 | 4,619  | 3,708   | 6,698   | 14,418       | 2,999                  |
| 1993/94           | 42,091  | 5,074 | 27,044 | 5,118  | 2,263   | 9,833   | 10,838       | 3,857                  |
| 1994/95           | 35,282  | 6,834 | 19,532 | 4,157  | 1,158   | 6,097   | 5,356        | 1,670                  |
| 1995/96           | 33,485  | 3,263 | 21,363 | 5,456  | 938     | 6,251   | 6,430        | 1,661                  |
| 1996/97           | 6,737   | 1,430 | 32,557 | 1,449  | 563     | 62      | 2,892        | 490                    |
| Average 1985-1998 | 36,565  | 5,823 | 22,590 | 8,191  | 2,376   | 8,693   | 9,495        | 2,635                  |

Source: Department of Agriculture, Zanzibar

## ANNEX 8

Table A 8.1. Land area (acres) cultivated for important food and cash crops after tsetse intervention in 1999 in Unguja, Zanzibar.

| Type of crop   | District |         |         |       |      | All districts |
|----------------|----------|---------|---------|-------|------|---------------|
|                | Central  | North-A | North-B | South | West |               |
| Coconut        | 1.7      | 1.5     | 1.5     | 1.8   | 2.8  | 1.9           |
| Cassava        | 1.3      | 1.6     | 1.6     | 1.1   | 1.4  | 1.4           |
| Plantain       | 2.9      | 1.0     | 1.0     | 0.7   | 0.0  | 1.1           |
| Sweet potatoes | 0.9      | 1.5     | 1.5     | 0.7   | 1.0  | 1.1           |
| Tania          | 1.2      | 1.2     | 1.2     | 0.9   | 1.0  | 1.1           |
| Banana         | 1.2      | 0.8     | 0.8     | 1.2   | 1.0  | 1.0           |
| Cloves         | 1.2      | 0.6     | 0.6     | n.a   | 2.5  | 1.0           |
| Rice           | 1.0      | 1.0     | 1.0     | 0.8   | 1.1  | 1.0           |
| Maize          | 1.2      | 0.5     | 0.5     | 1.1   | 1.1  | 0.9           |
| Yams           | 0.7      | 0.5     | 0.5     | 0.8   | 0.9  | 0.7           |
| Vegetables     | 1.0      | 0.6     | 0.6     | 0.9   | 0.5  | 0.7           |

Table A 8.2. Quantities of food and cash crops harvested from cultivated areas before tsetse intervention in 1985/86 in Unguja, Zanzibar.

| Type of crop   | District |         |         |       |       | All Districts |                                   |
|----------------|----------|---------|---------|-------|-------|---------------|-----------------------------------|
|                | Central  | North-A | North-B | South | West  | Average       | % of farmers responding (n=1,138) |
| Cassava        | 632      | 829     | 849     | 578   | 1,240 | 826           | 43.5                              |
| Rice           | 554      | 374     | 432     | 750   | 581   | 538           | 24.7                              |
| Maize          | 451      | 300     | 358     | 363   | 674   | 429           | 9.0                               |
| Banana         | 66       | 24      | 30      | 40    | 58    | 44            | 31.0                              |
| Plantain       | 5        | 46      | 4       | 10    | n.a   | 13            | 1.3                               |
| Sweet potatoes | 519      | 1,017   | 1,019   | 559   | 1,380 | 899           | 26.1                              |
| Yams           | 626      | 50      | 388     | 387   | 648   | 420           | 5.5                               |
| Cloves         | 200      | 244     | 448     | n.a   | 227   | 224           | 4.0                               |
| Coconut        | 2,825    | 428     | 778     | 418   | 1,219 | 1,134         | 15.5                              |
| Tania          | 346      | 510     | 378     | 357   | 233   | 365           | 5.0                               |
| Vegetables     | 259      | 10      | 85      | 32    | 284   | 134           | 4.1                               |

Source: Source: Averages and percentages are computed from Ministry of Agriculture statistics, Zanzibar.

Table A 8.3. Food and cash crop yields obtained before tsetse intervention in 1985/86 in Unguja, Zanzibar (Kg/acre)

| Type of crop   | District |         |         |       |       | All Districts |                                   |
|----------------|----------|---------|---------|-------|-------|---------------|-----------------------------------|
|                | Central  | North-A | North-B | South | West  | Average       | % of farmers responding (n=1,138) |
| Cassava        | 522      | 528     | 524     | 503   | 912   | 597           | 43.5                              |
| Rice           | 583      | 378     | 366     | 600   | 528   | 492           | 24.7                              |
| Maize          | 410      | 600     | 377     | 370   | 695   | 477           | 9.0                               |
| Banana*        | 55       | 34      | 32      | 34    | 61    | 44            | 31.0                              |
| Plantain*      | 29       | 73      | 13      | 26    | 0     | 44            | 1.3                               |
| Sweet potatoes | 590      | 969     | 842     | 717   | 1,190 | 885           | 26.1                              |
| Yams           | 763      | 100     | 377     | 472   | 953   | 545           | 5.5                               |
| Cloves         | 200      | 387     | 193     | 0     | 86    | 170           | 4.0                               |
| Coconut        | 2,004    | 245     | 314     | 299   | 445   | 580           | 15.5                              |
| Tania          | 449      | 785     | 353     | 322   | 175   | 370           | 5.0                               |
| Vegetables     | 341      | 20      | 185     | 60    | 861   | 260           | 4.1                               |

\* Bunches

Source: Averages and percentages are computed from Ministry of Agriculture statistics, Zanzibar.

Table A 8.4. Land area (acres) cultivated for important food and cash crops after tsetse intervention in 1999 in Unguja, Zanzibar.

| Type of crop   | District |         |         |       |                | Total |
|----------------|----------|---------|---------|-------|----------------|-------|
|                | Central  | North-A | North-B | South | West           |       |
| Coconut        | 1.7      | 1.5     | 1.5     | 1.8   | 2.8            | 1.9   |
| Cassava        | 1.3      | 1.6     | 1.6     | 1.1   | 1.4            | 1.4   |
| Plantain       | 2.9      | 1.0     | 1.0     | 0.7   | 0.0            | 1.1   |
| Sweet potatoes | 0.9      | 1.5     | 1.5     | 0.7   | 1.0            | 1.1   |
| Tania          | 1.2      | 1.2     | 1.2     | 0.9   | 1.0            | 1.1   |
| Banana         | 1.2      | 0.8     | 0.8     | 1.2   | 1.0            | 1.0   |
| Cloves         | 1.2      | 0.6     | 0.6     | n.a   | 2.5            | 1.0   |
| Rice           | 1.0      | 1.0     | 1.0     | 0.8   | 1.1            | 1.0   |
| Maize          | 1.2      | 0.5     | 0.5     | 1.1   | 1.1            | 0.9   |
| Yams           | 0.7      | 0.5     | 0.5     | 0.8   | 0.9            | 0.7   |
| Vegetables     | 1.0      | 0.6     | 0.6     | 0.9   | <del>0.5</del> | 0.7   |

Table A 8.5. Quantities of food and cash crops harvested from cultivated areas after tsetse intervention in 1999 in Unguja, Zanzibar.

| Type of crop   | District |         |         |       |      | All Districts |                                   |
|----------------|----------|---------|---------|-------|------|---------------|-----------------------------------|
|                | Central  | North-A | North-B | South | West | Average       | % of farmers responding (n=1,138) |
| Cassava        | 611      | 711     | 978     | 487   | 1164 | 790           | 85.6                              |
| Rice           | 502      | 430     | 426     | 295   | 560  | 443           | 40.5                              |
| Maize          | 416      | 150     | 418     | 315   | 661  | 392           | 17.6                              |
| Banana         | 74       | 29      | 37      | 47    | 74   | 52            | 63.6                              |
| Plantain       | 24       | 57      | 3       | 21    | n.a  | 21            | 4.4                               |
| Sweet potatoes | 508      | 1177    | 1281    | 215   | 1005 | 837           | 50.6                              |
| Yams           | 434      | 525     | 410     | 360   | 628  | 471           | 13.5                              |
| Cloves         | 320      | 100     | 528     | n.a   | 297  | 249           | 5.2                               |
| Coconut        | 2379     | 492     | 782     | 547   | 1420 | 1,124         | 23.0                              |
| Tania          | 351      | 450     | 363     | 231   | 380  | 355           | 13.9                              |
| Vegetables     | 429      | 177     | 73      | 49    | 258  | 197           | 16.0                              |

Table A 8.6. Food and cash crop yields obtained after tsetse intervention in 1999 in Unguja, Zanzibar (Kg/acre)

| Type of crop   | District |         |         |       |       | All Districts |                                   |
|----------------|----------|---------|---------|-------|-------|---------------|-----------------------------------|
|                | Central  | North-A | North-B | South | West  | Average       | % of farmers responding (n=1,138) |
| Cassava        | 477      | 434     | 596     | 443   | 826   | 559           | 85.6                              |
| Rice           | 512      | 413     | 410     | 369   | 491   | 443           | 40.5                              |
| Maize          | 353      | 300     | 836     | 297   | 630   | 457           | 17.6                              |
| Banana*        | 63       | 35      | 45      | 41    | 75    | 53            | 63.6                              |
| Plantain*      | 8        | 57      | 3       | 32    | 0     | 19            | 4.4                               |
| Sweet potatoes | 577      | 801     | 871     | 299   | 1,005 | 756           | 50.6                              |
| Yams           | 611      | 1,050   | 820     | 429   | 714   | 687           | 13.5                              |
| Cloves         | 267      | 159     | 838     | 0     | 120   | 252           | 5.2                               |
| Coconut        | 1,442    | 328     | 521     | 297   | 514   | 608           | 23.0                              |
| Tania          | 290      | 369     | 298     | 269   | 396   | 324           | 13.9                              |
| Vegetables     | 452      | 305     | 126     | 55    | 561   | 285           | 16.0                              |

\* Bunches

Source: 1999 Survey results.

**ANNEX 9****Terms of Reference**

The main duties of the mission team were to:

- (i) Obtain appropriate information on the livestock situation and related agricultural and other relevant economic parameters on Unguja Island of Zanzibar before initiation of tsetse/trypanosomosis intervention operations in 1985/86 and 1999 and
- (ii) establish parameters and sampling procedures to enable future impact assessments of tsetse eradication on livestock and agriculture development as well as well-being of people on Unguja.

These objectives were to be accomplished within two missions to Unguja, Zanzibar.

**First Mission:**

During the first mission the team was expected to :

- Prepare a questionnaire to retrospectively collect relevant information on the livestock and agriculture situation in 1985/86 before initiation of tsetse intervention operations, taking into account some available data and reports.
- Prepare a questionnaire for assessing the current status and future potential of livestock and agriculture development in Zanzibar, taking into account current livestock and agricultural practices, as well as, the potential for intensified systems, with particular reference to the potential for genetically upgraded cattle breeds. Incorporate into the data compilation procedure measures for data quality assurance.
- Prepare a time frame for the data compilation and the economic impact exercise and advise on additional action to be taken by the Government, IAEA and other collaborators.
- Collaborate closely with the local authorities to identify and provide all necessary instructions to enumerators who will interview farmers, cattle owners and other people in Zanzibar in connection with the data collection exercise.
- Define an appropriate data evaluation procedure and a convenient mode of data presentation and of evaluation of relevant current and anticipated developments.

**Second Mission**

During the second mission the team was expected to:

- Screen the completed questionnaires and, when necessary, interview selected farmers, livestock owners and other people, in order to obtain any complementary information.
- Summarise the status of livestock and agricultural systems in 1985/86. Highlight indicative key parameters for livestock productivity and performance and stress the respective implications for agricultural systems and for marketing of agricultural products.
- Summarise the status of livestock and agriculture development in 1999. Highlight indicative key parameters that show changes in livestock numbers, productivity and performance. Quantify and

qualify the changes and assess whether they are related to or due to the tsetse fly intervention and eradication operations that were implemented in late 1997.

- Prepare some predictive scenarios for the livestock and agricultural development through 2005, 2010 and 2015, taking into consideration the livestock and agricultural development over the past 15 years (1985 - 1999) and the assessed potential of livestock and agricultural development of Zanzibar and respective development plans of the Zanzibar authorities.
- Advise on issues that require attention by the Zanzibar authorities and other partners involved in livestock and agriculture development in Zanzibar.
